# Supplementary material for: Indium(iii) triflate-catalysed [4 + 2] benzannulation reactions of o-alkynylbenzaldehydes with enolisable carbonyl compounds: selective synthesis of naphthyl ketones
Source: Royal Society of Chemistry journal article supplement (doi:10.1039/c3ob41439f), 2013-10-03

## Supporting Information

### **Indium(III) Triflate-Catalysed [4+2] Benzannulation Reactions of *o*-Alkynylbenzaldehydes with Enolisable Carbonyl Compounds: Selective Synthesis of Naphthyl Ketones**

Karuppusamy Sakthivel and Kannupal Srinivasan\*

School of Chemistry, Bharathidasan University, Tiruchirappalli-620 024  
Tamil Nadu, India.

Fax: +91-431-2407043; E-mail: [srinivasank@bdu.ac.in](mailto:srinivasank@bdu.ac.in)

Copies of  $^1\text{H}$  and  $^{13}\text{C}$  NMR spectra of all products....2-65

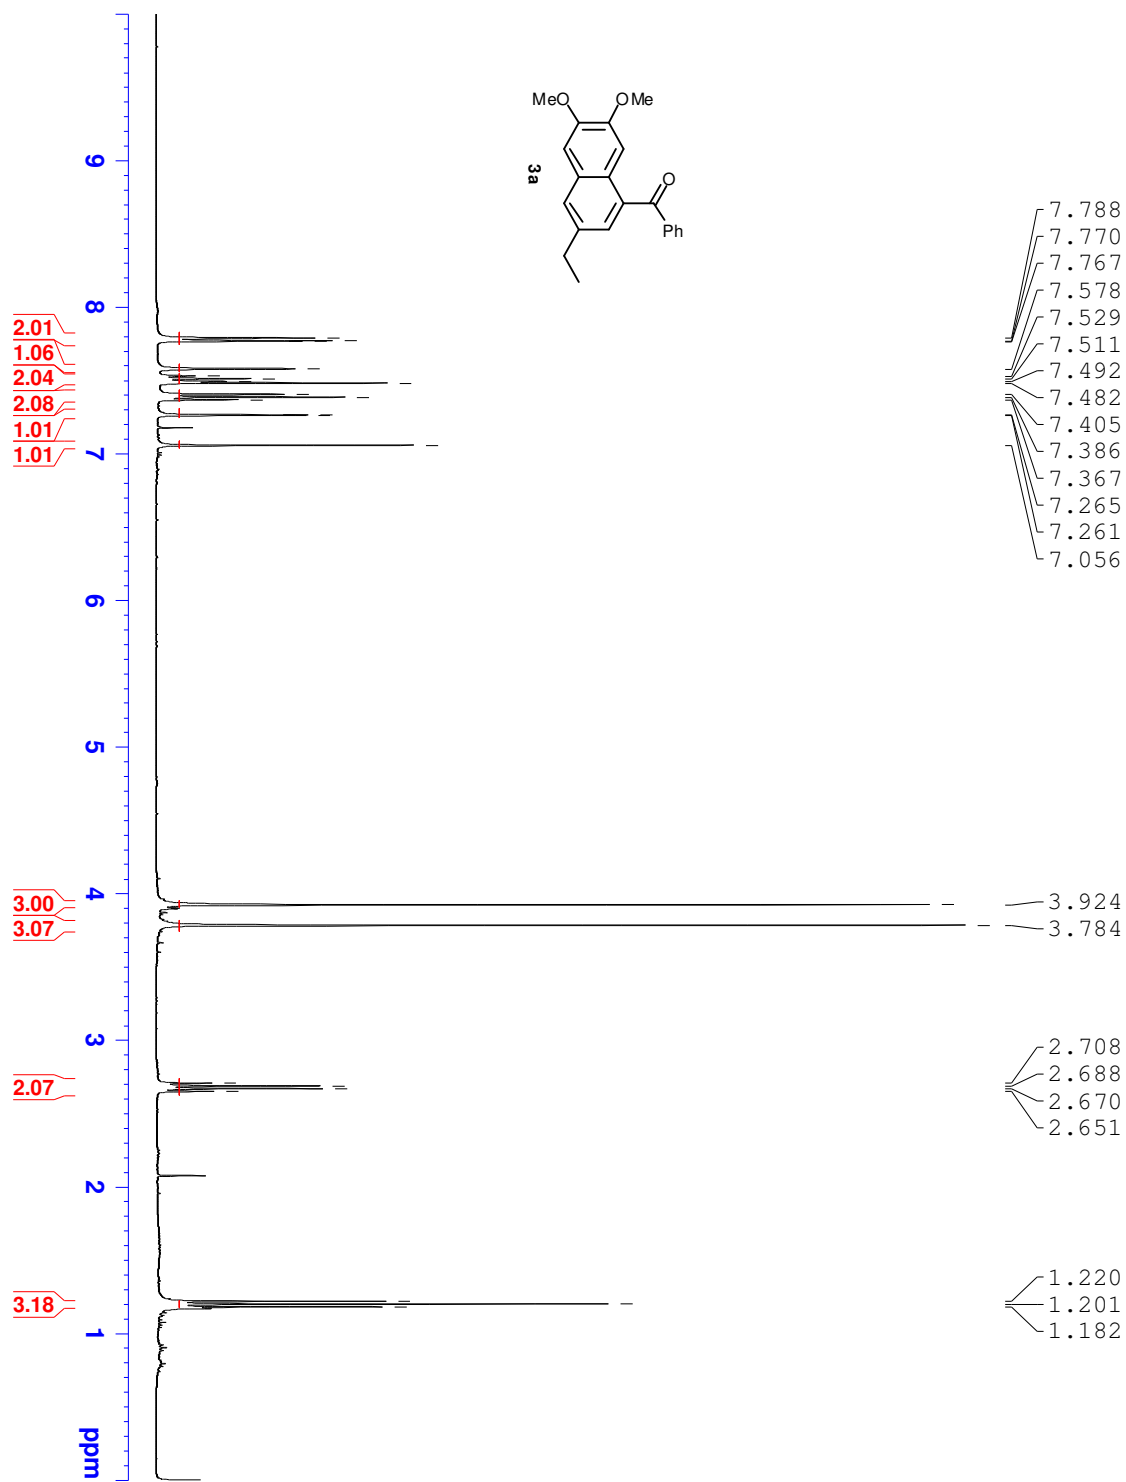

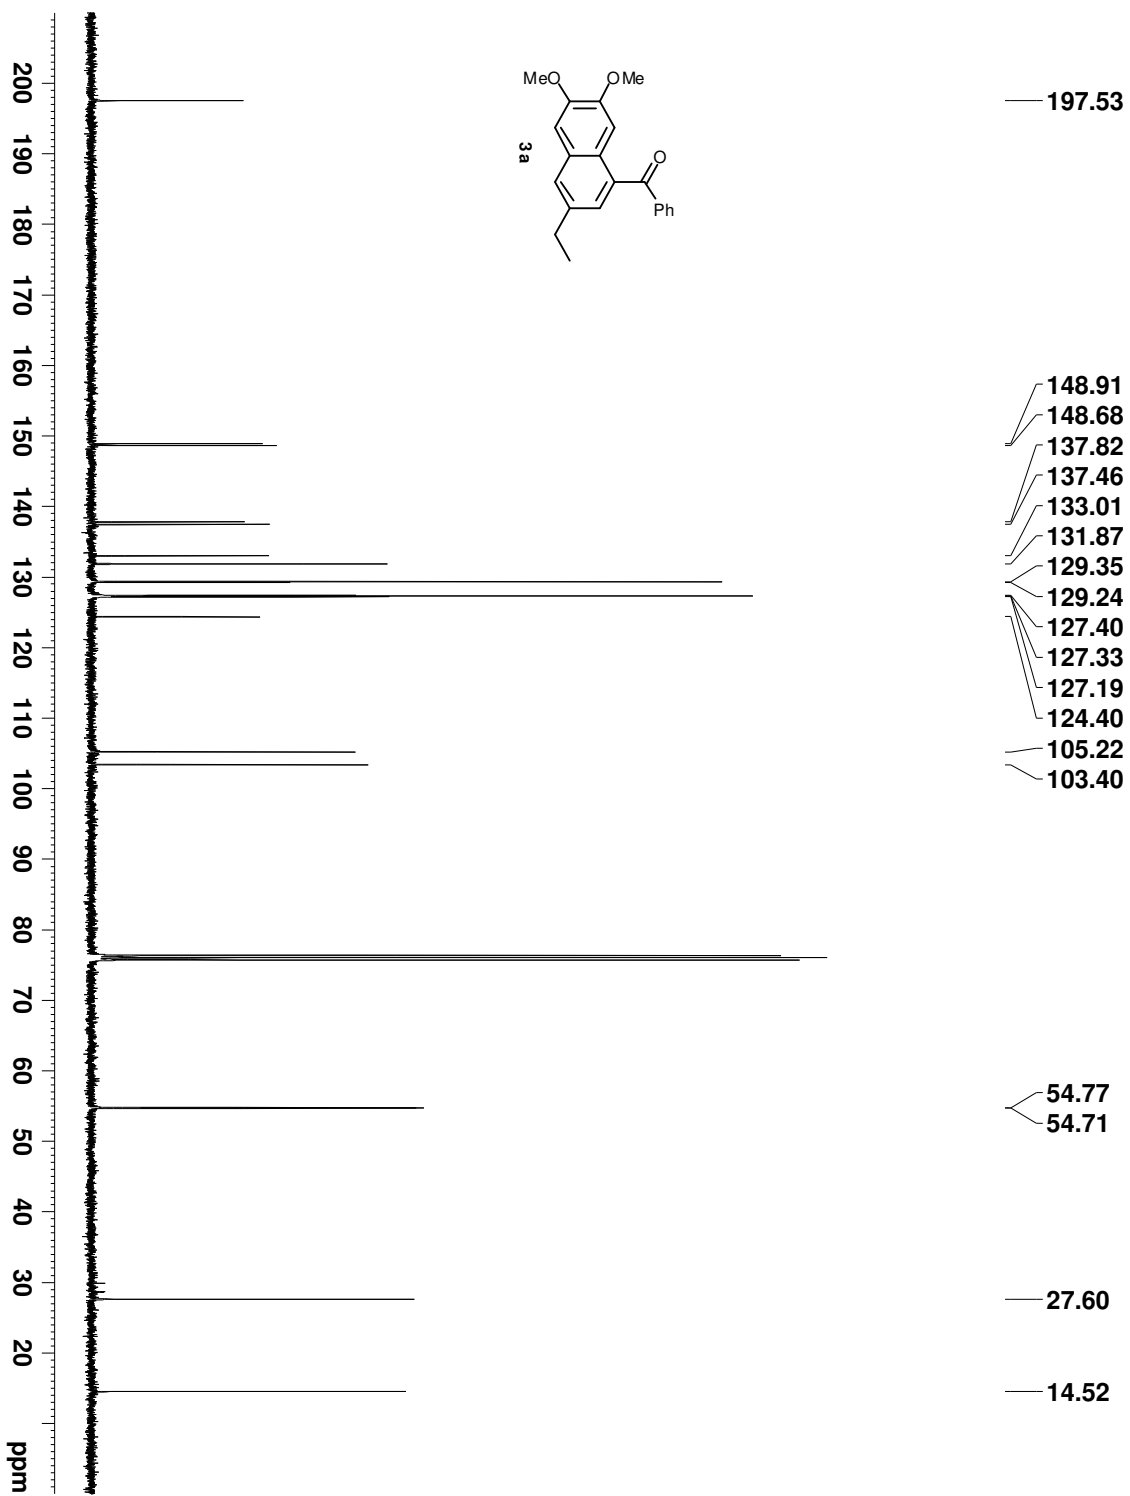

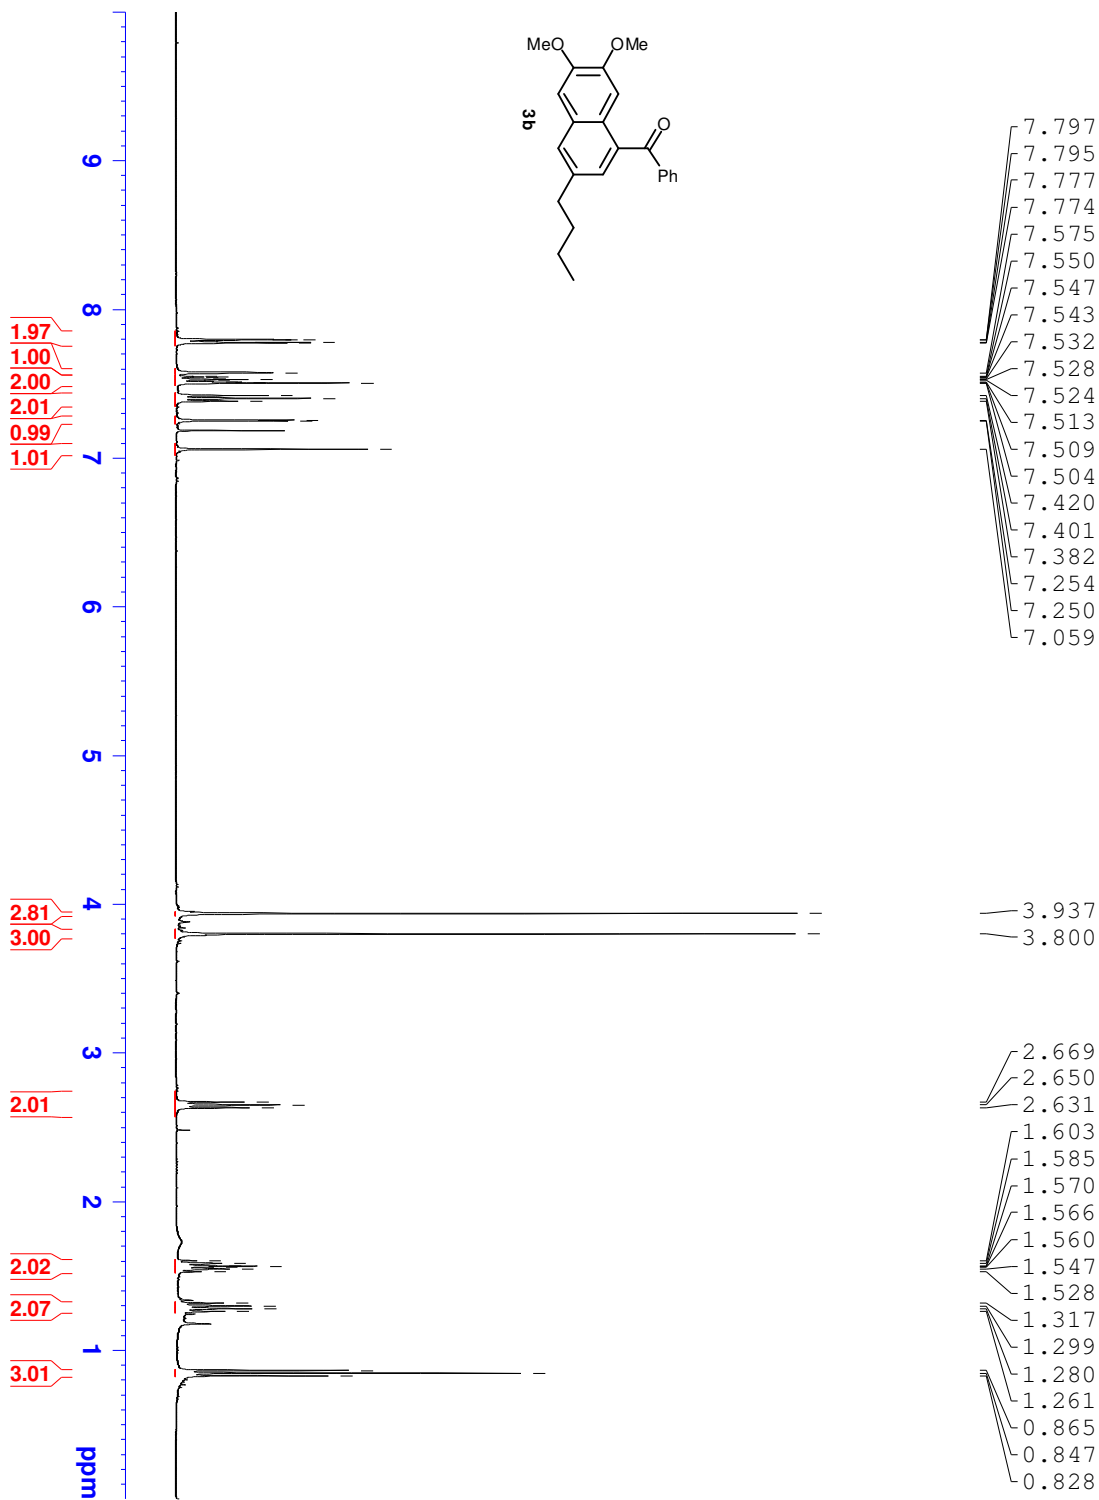

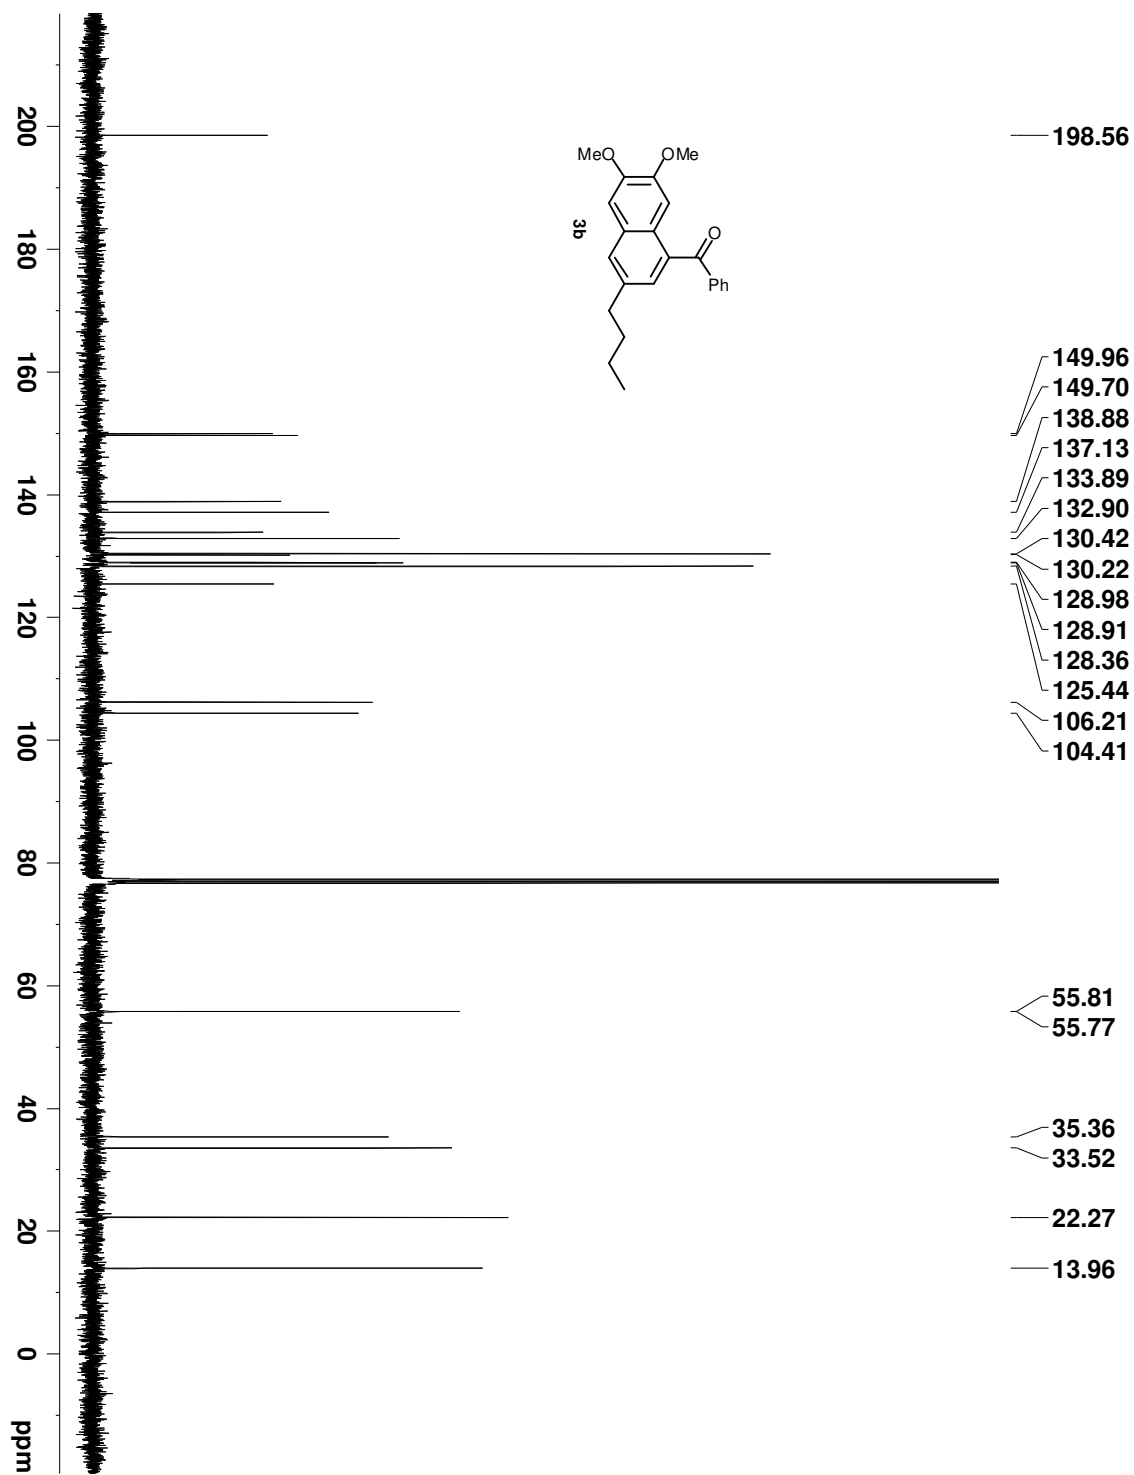

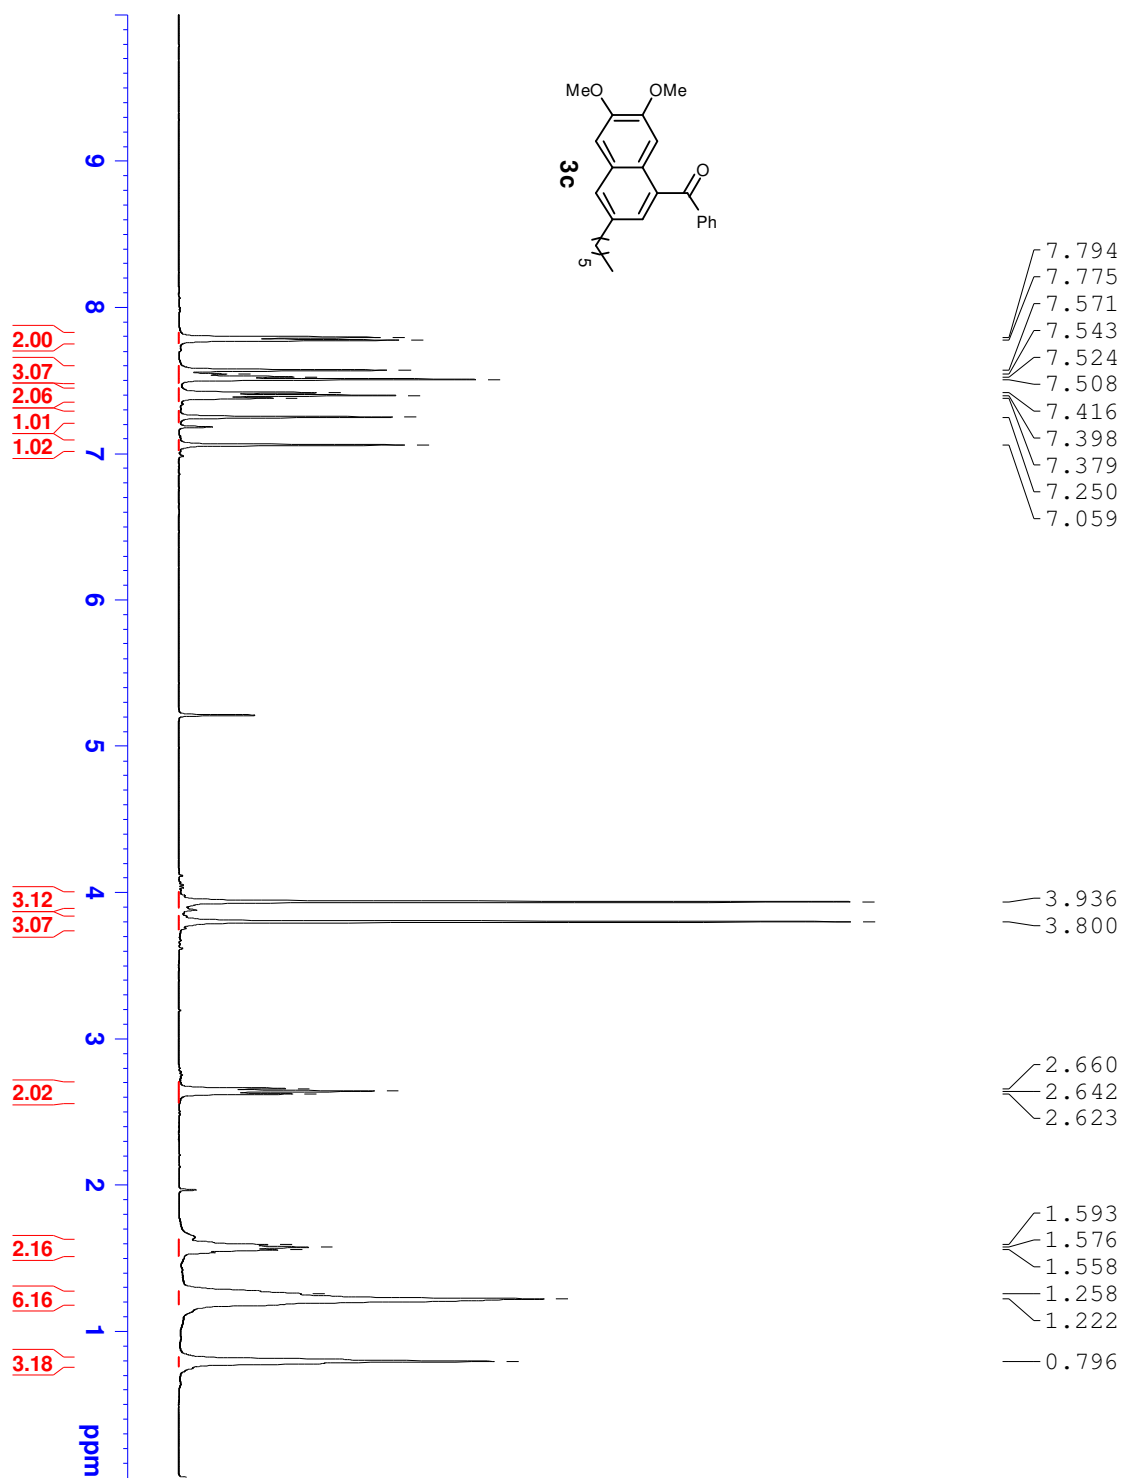

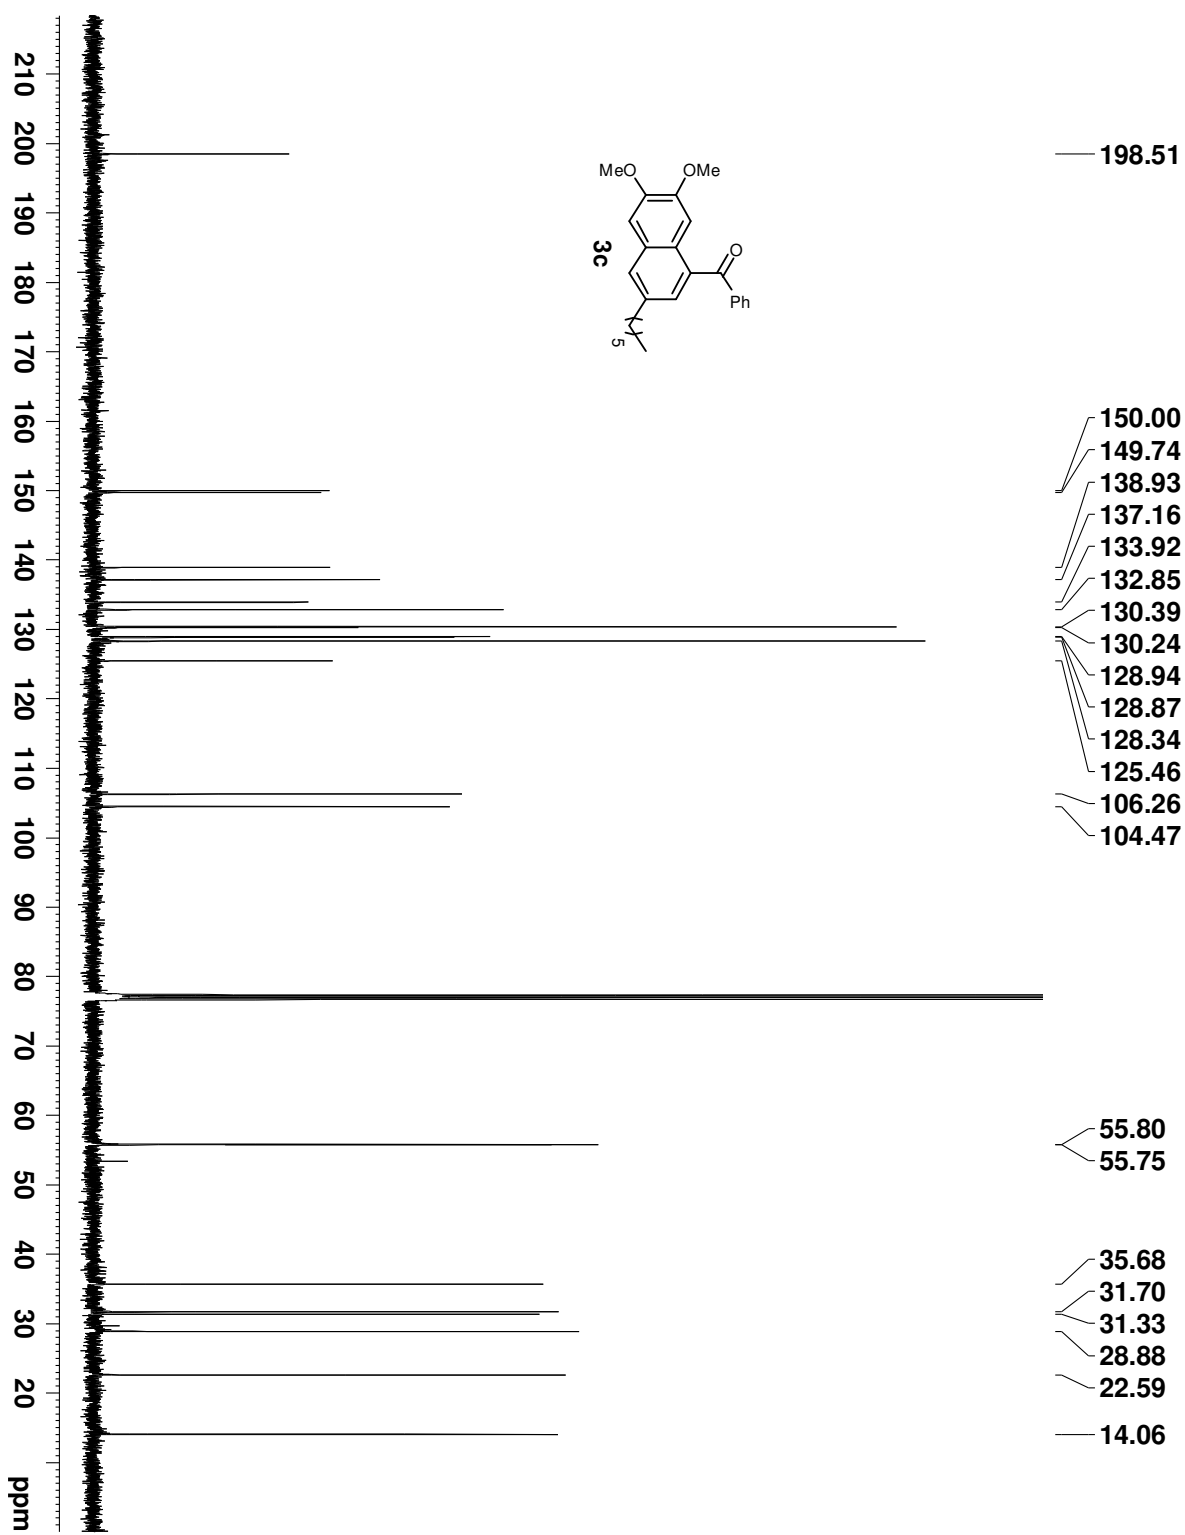

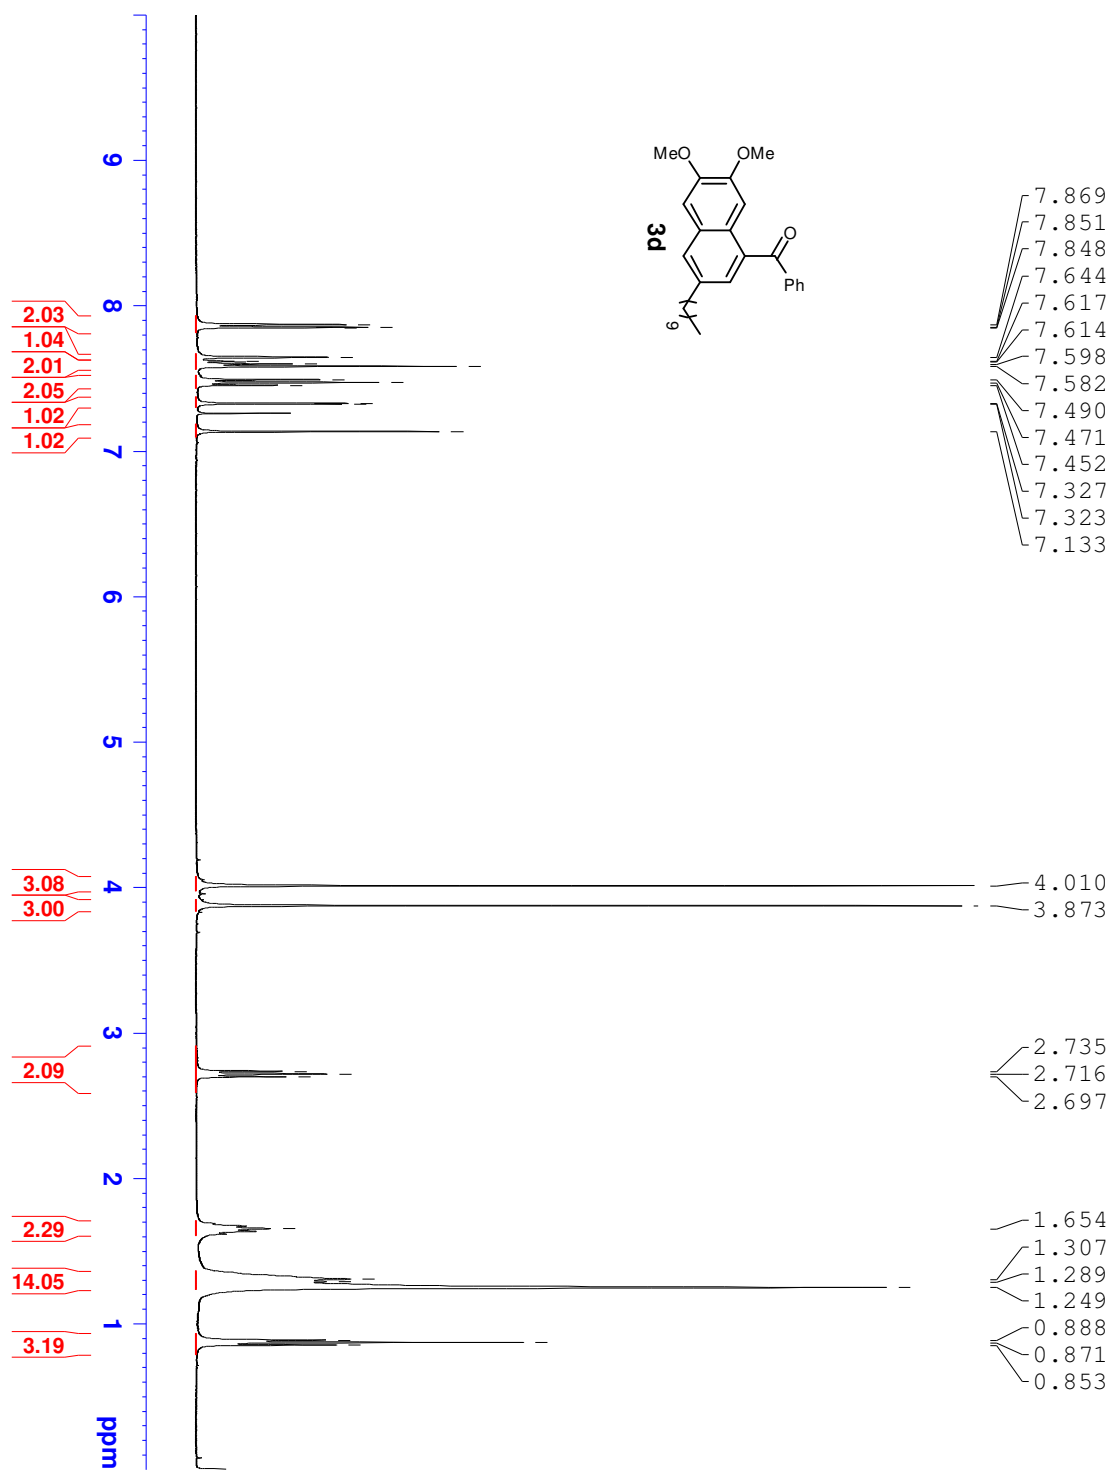



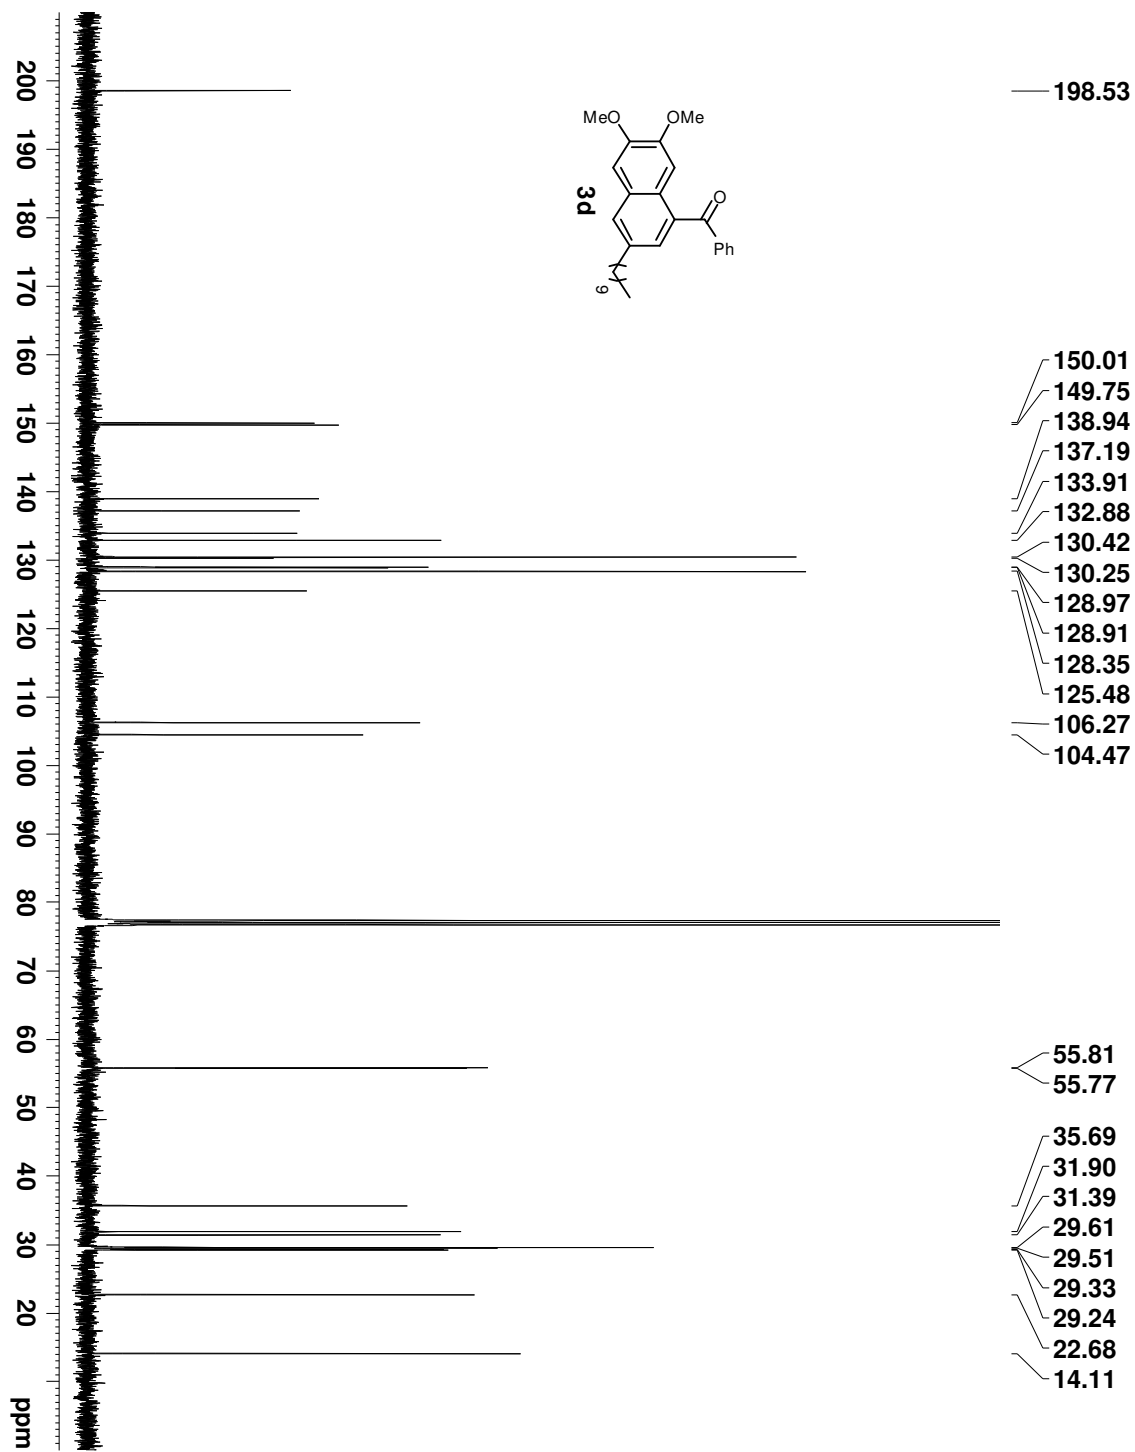

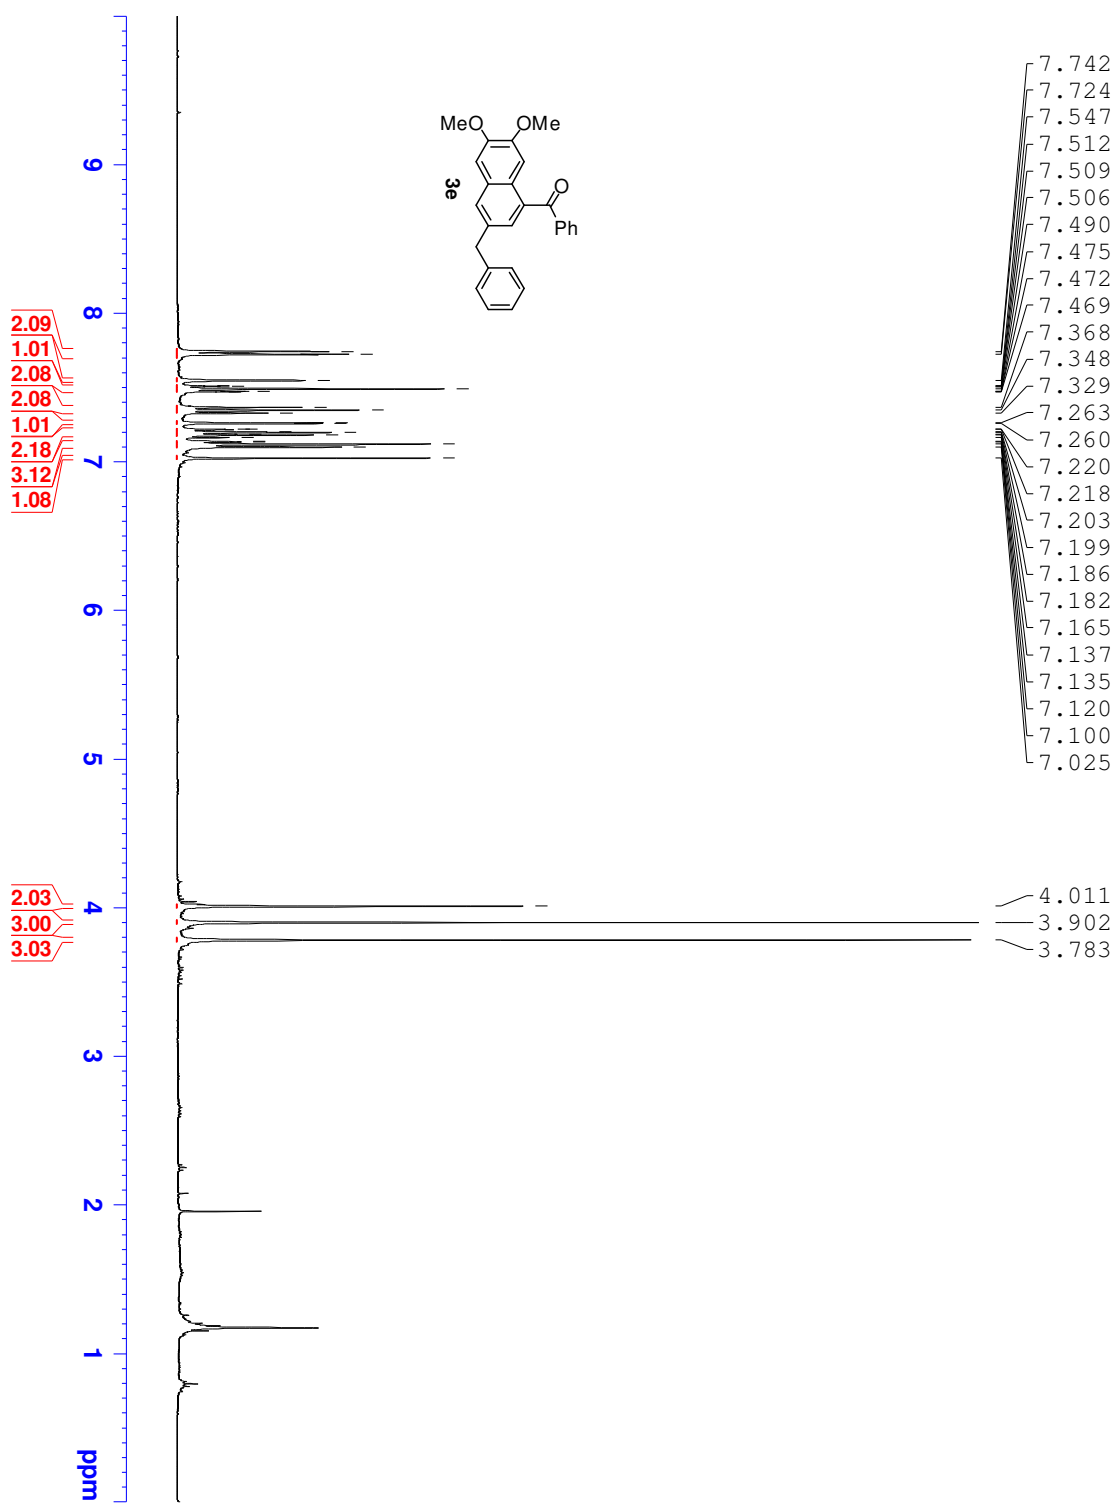

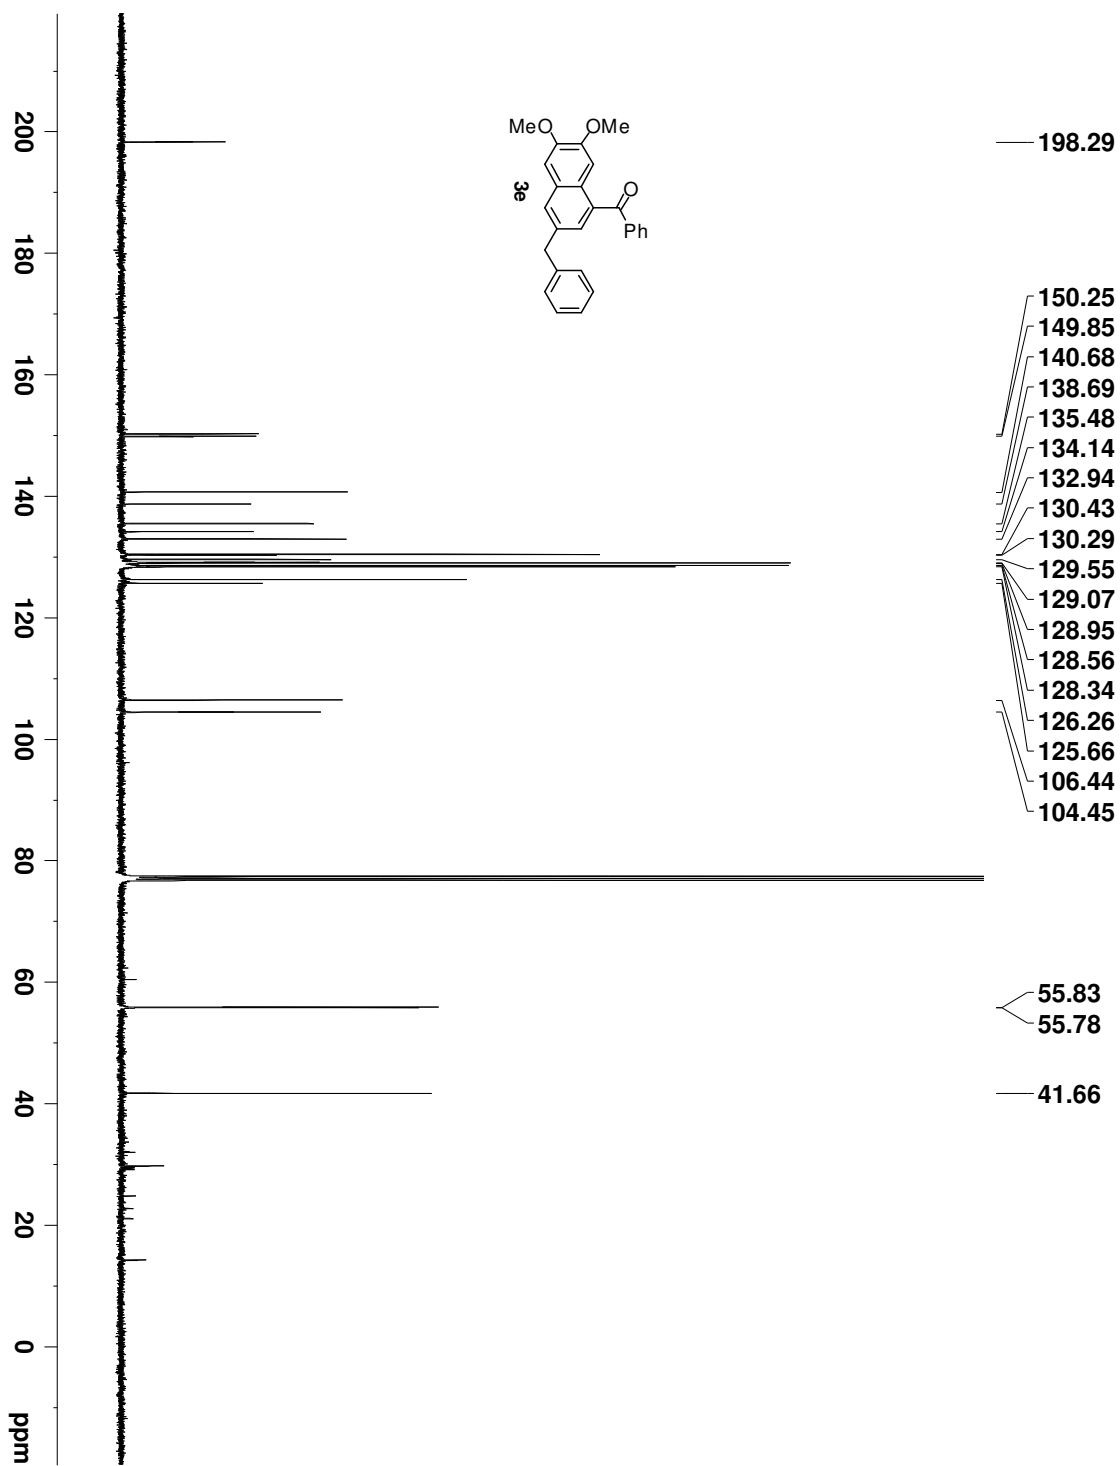

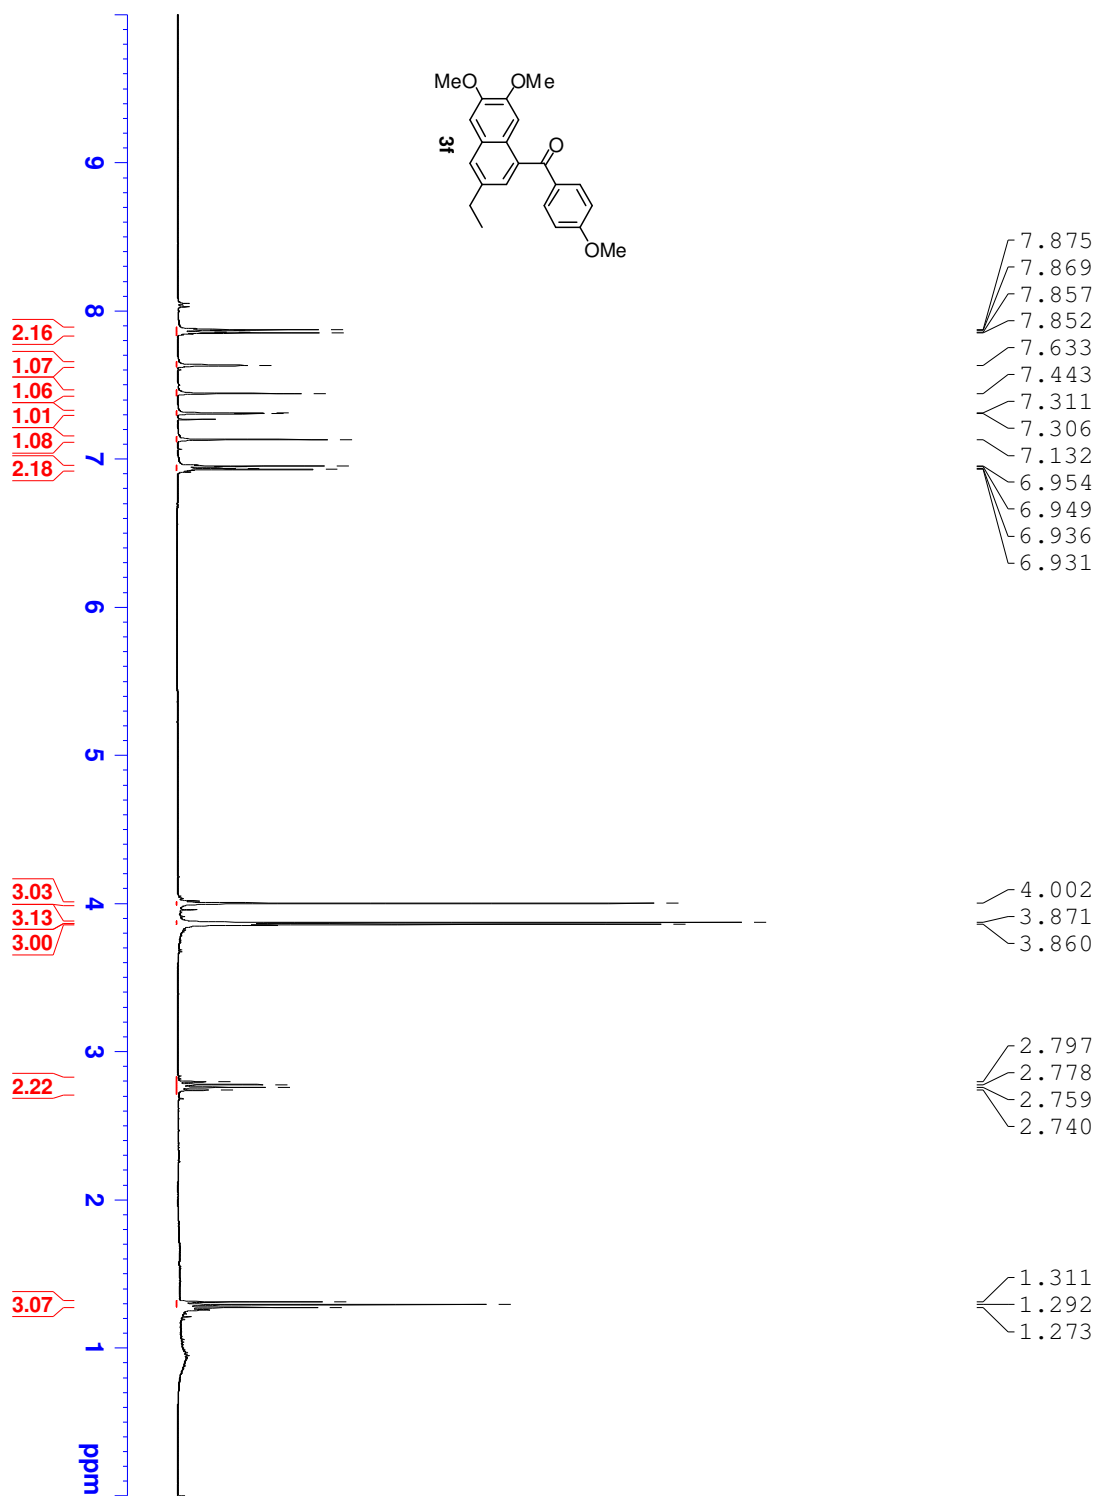

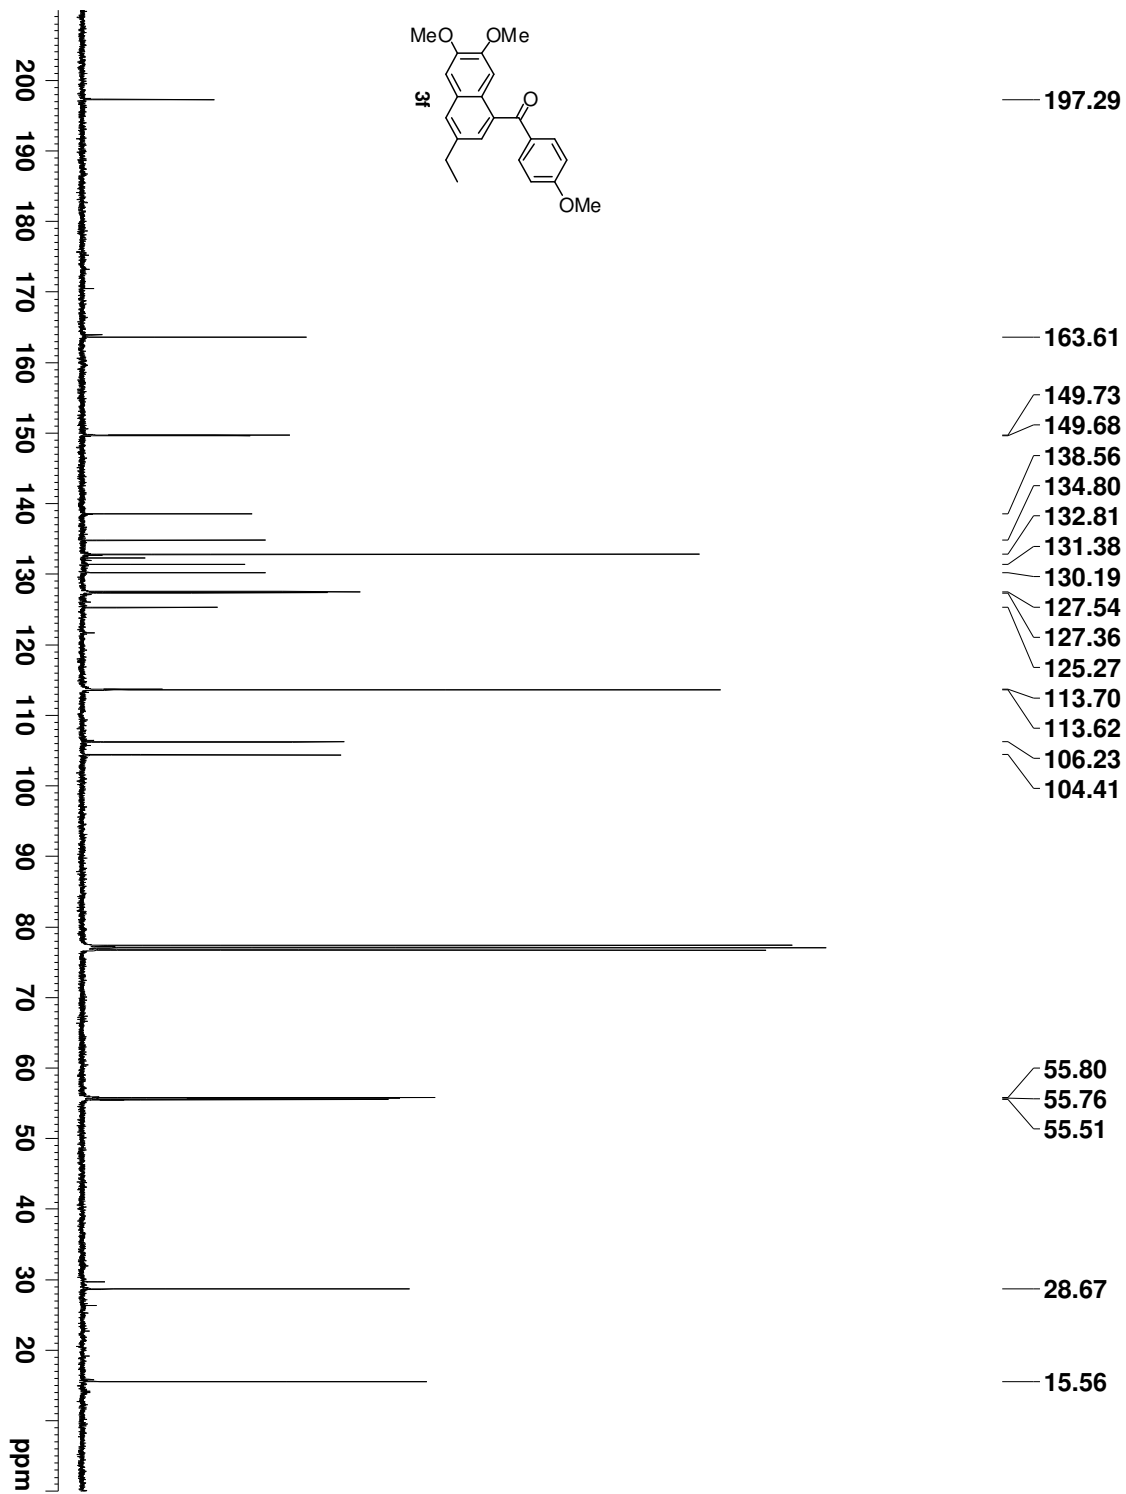

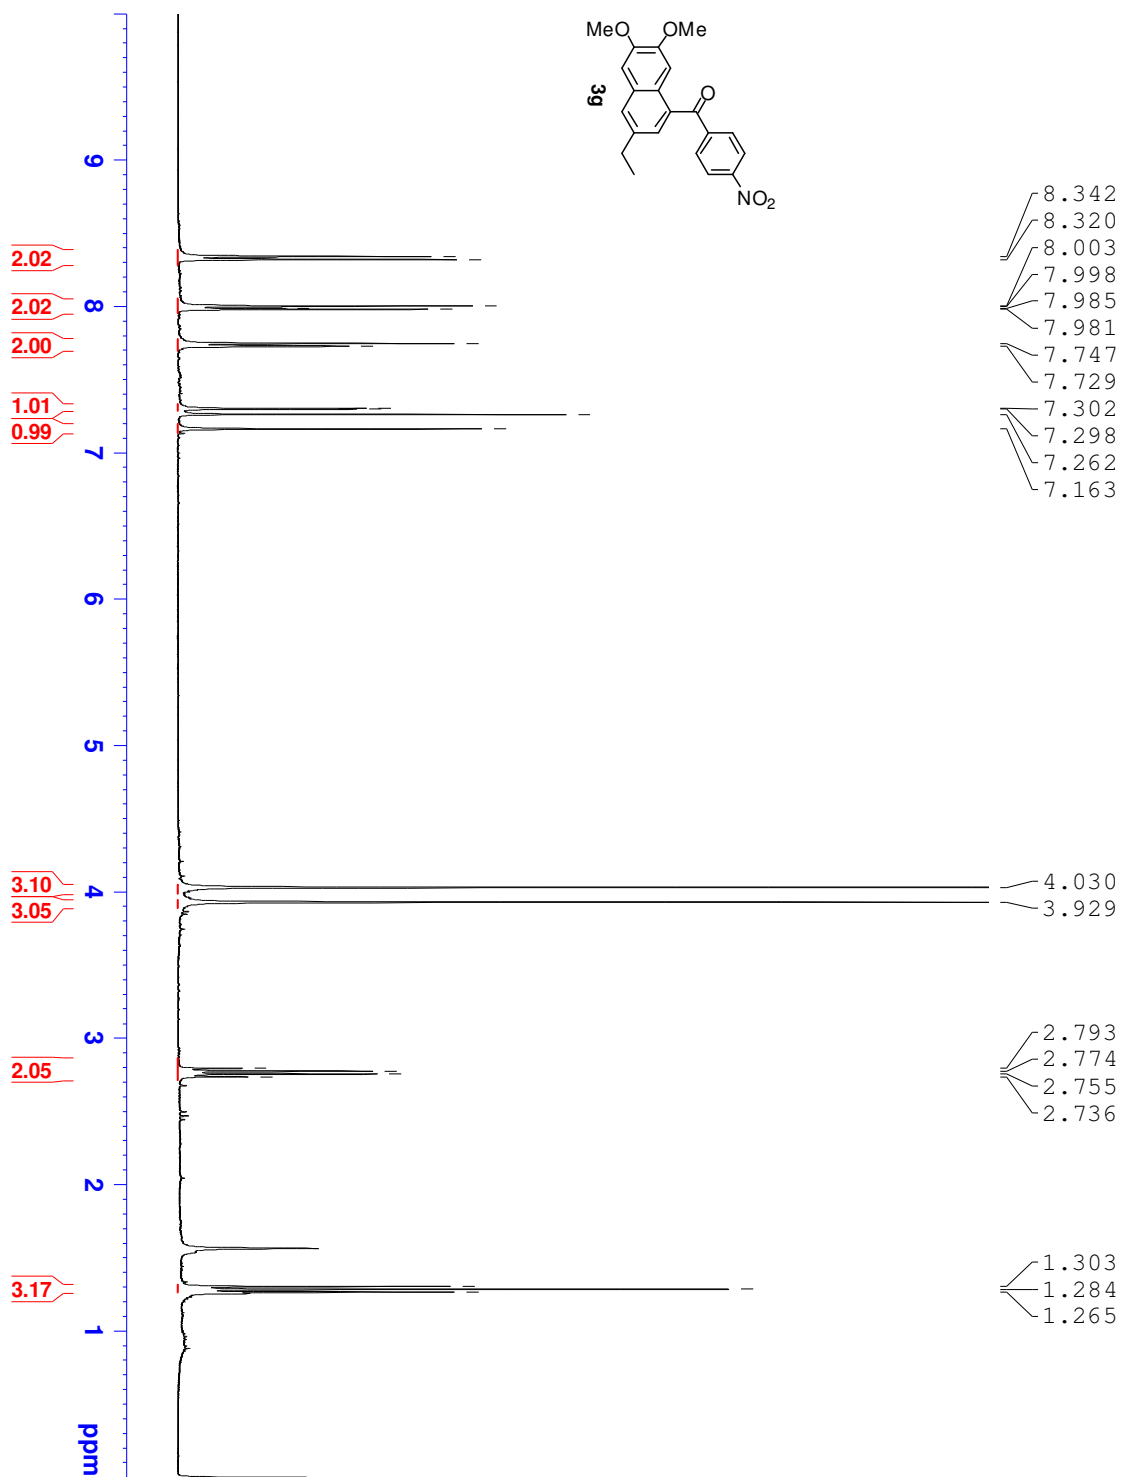

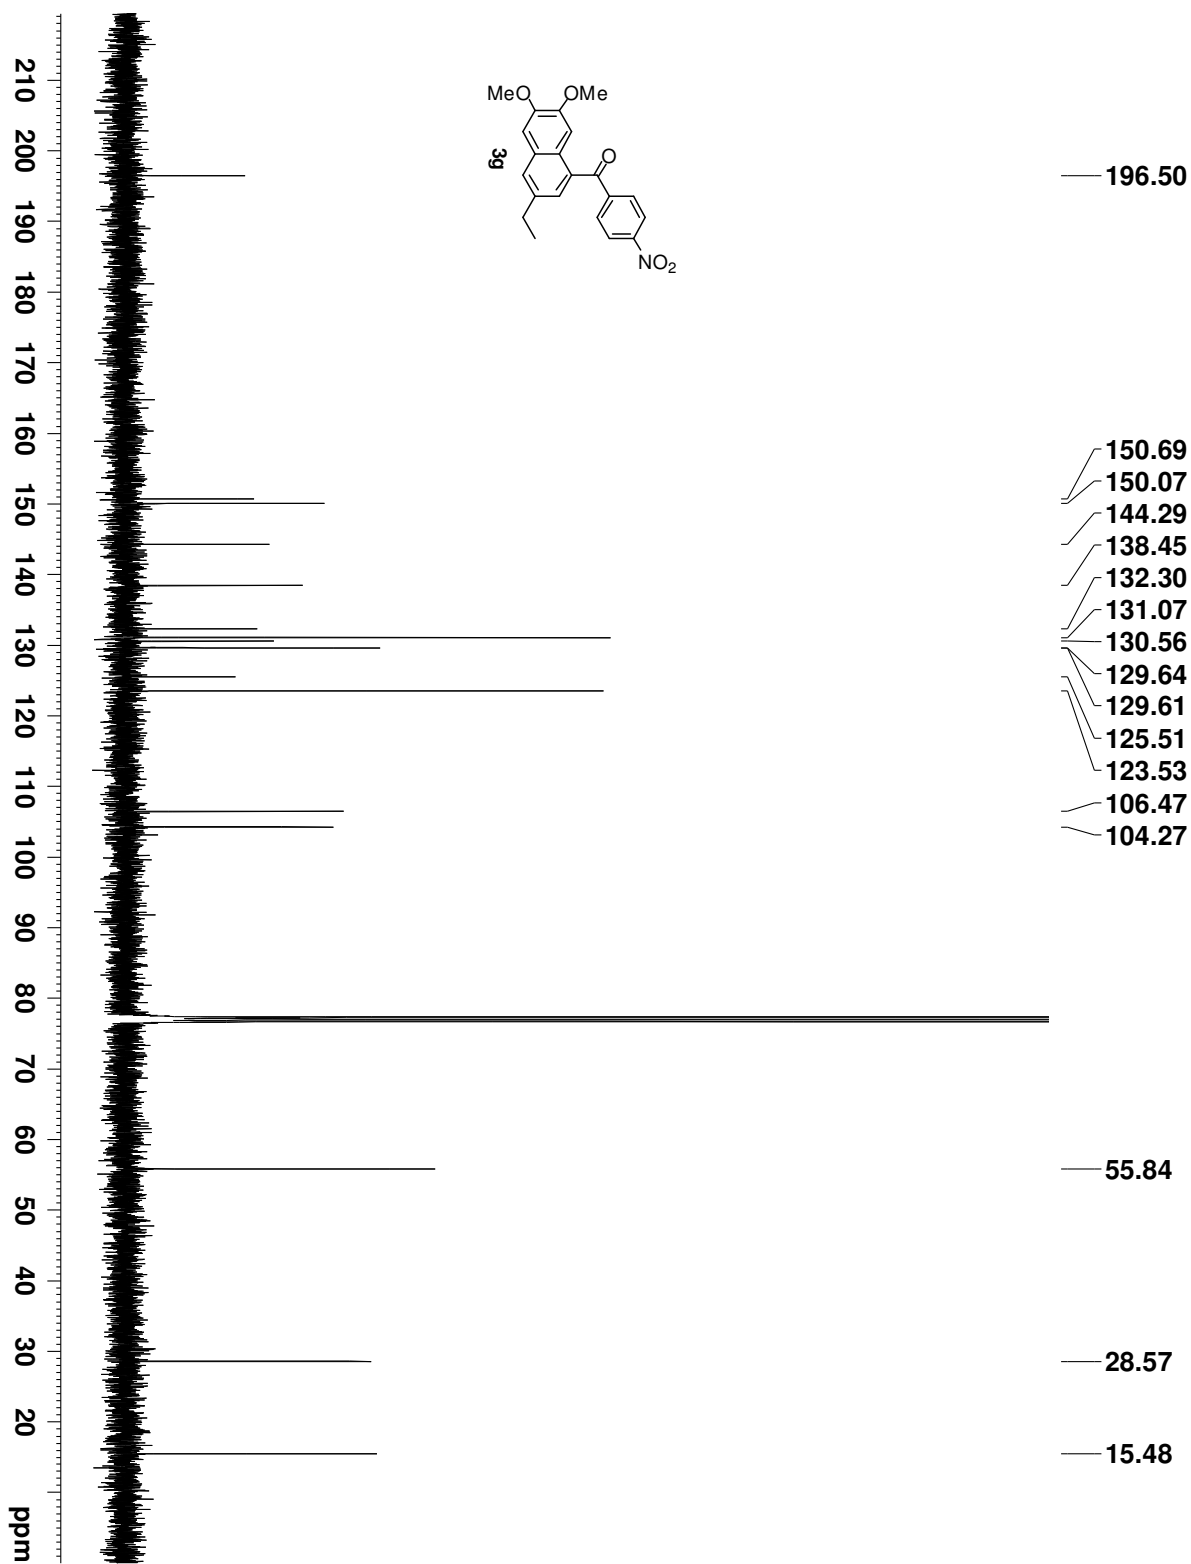

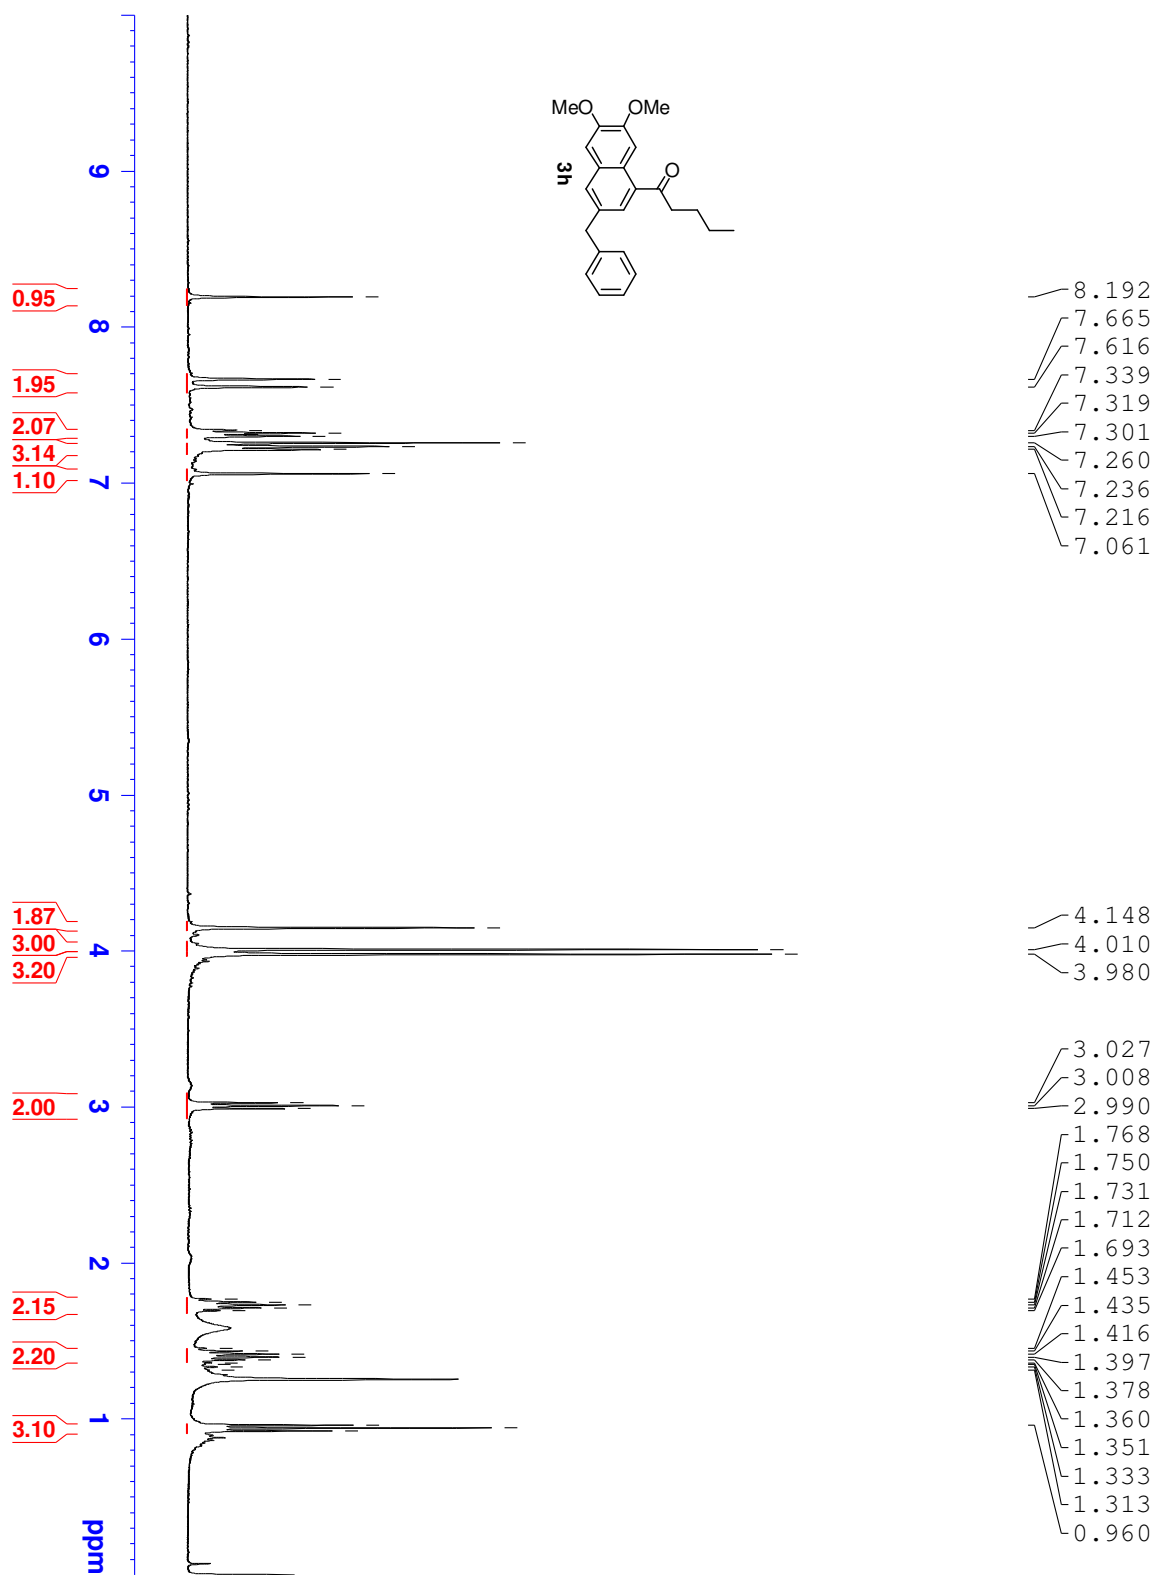



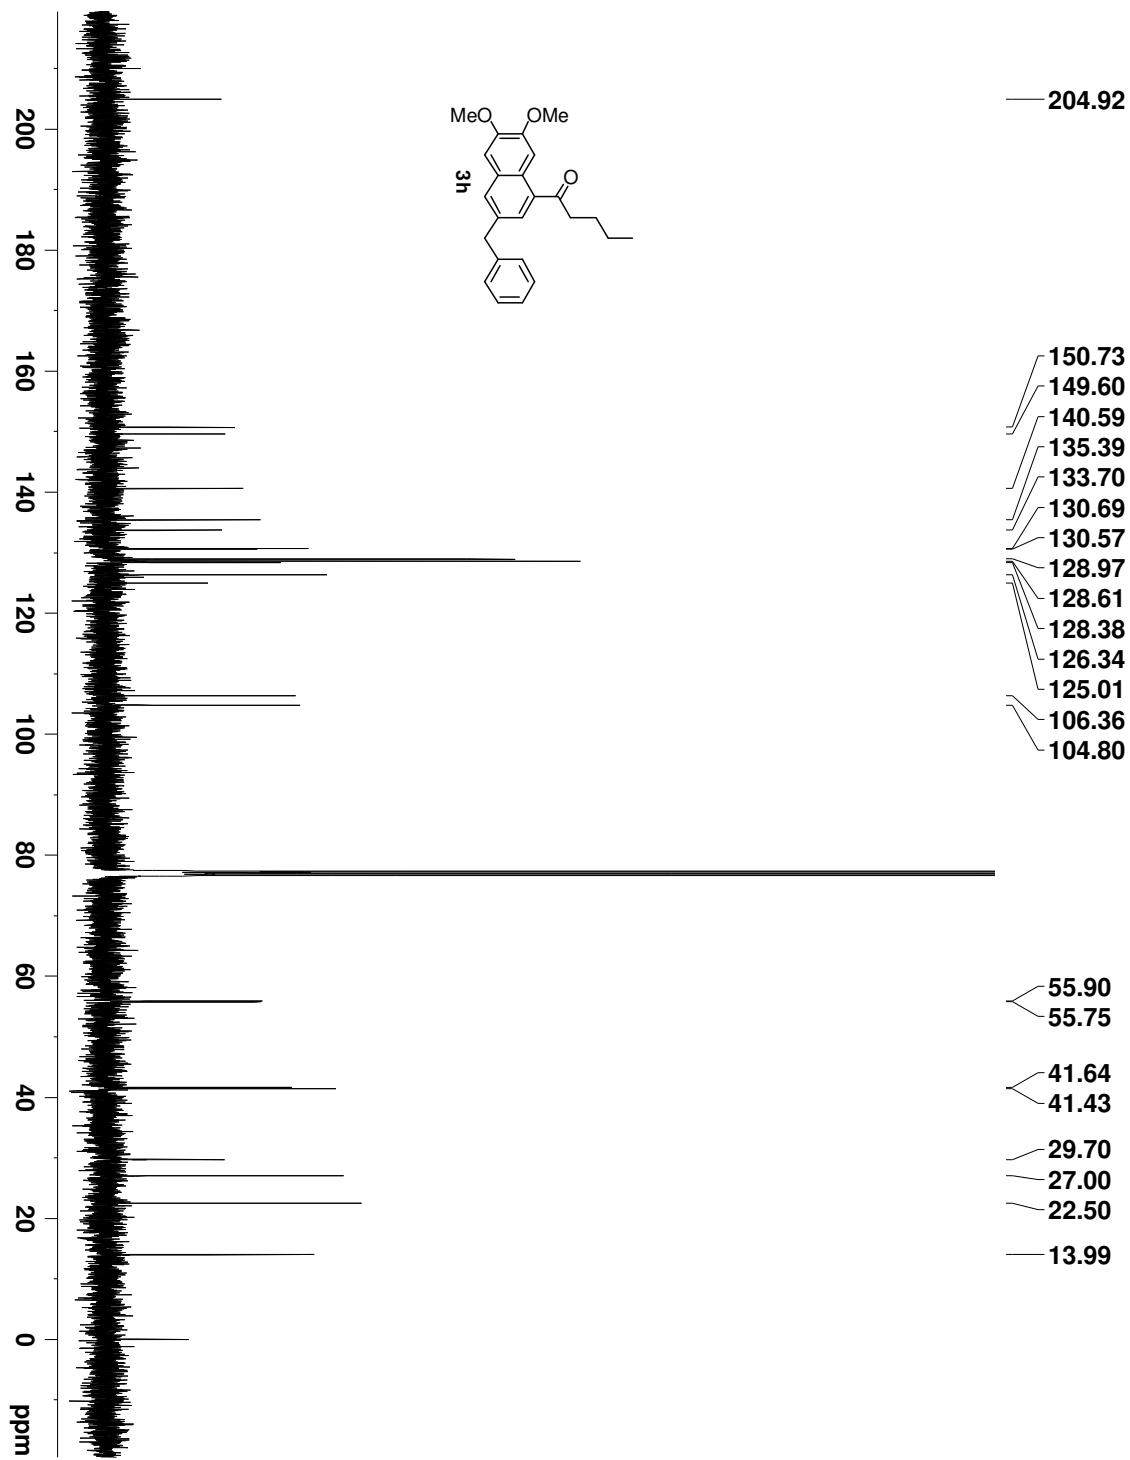

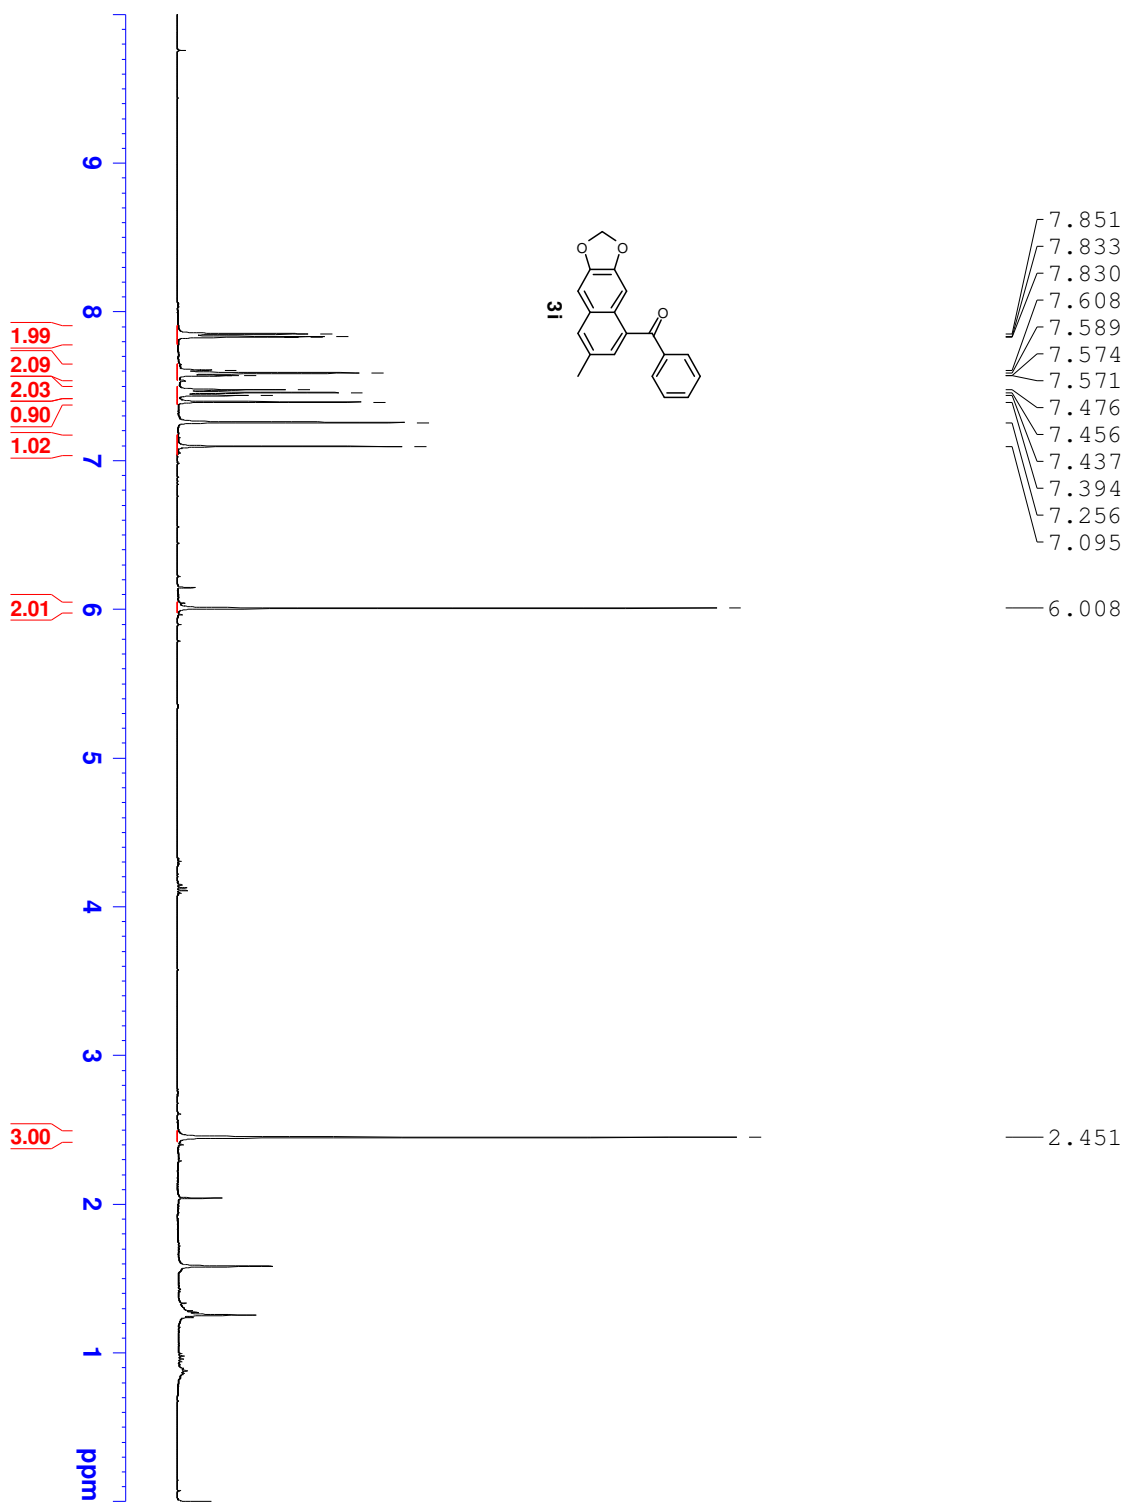

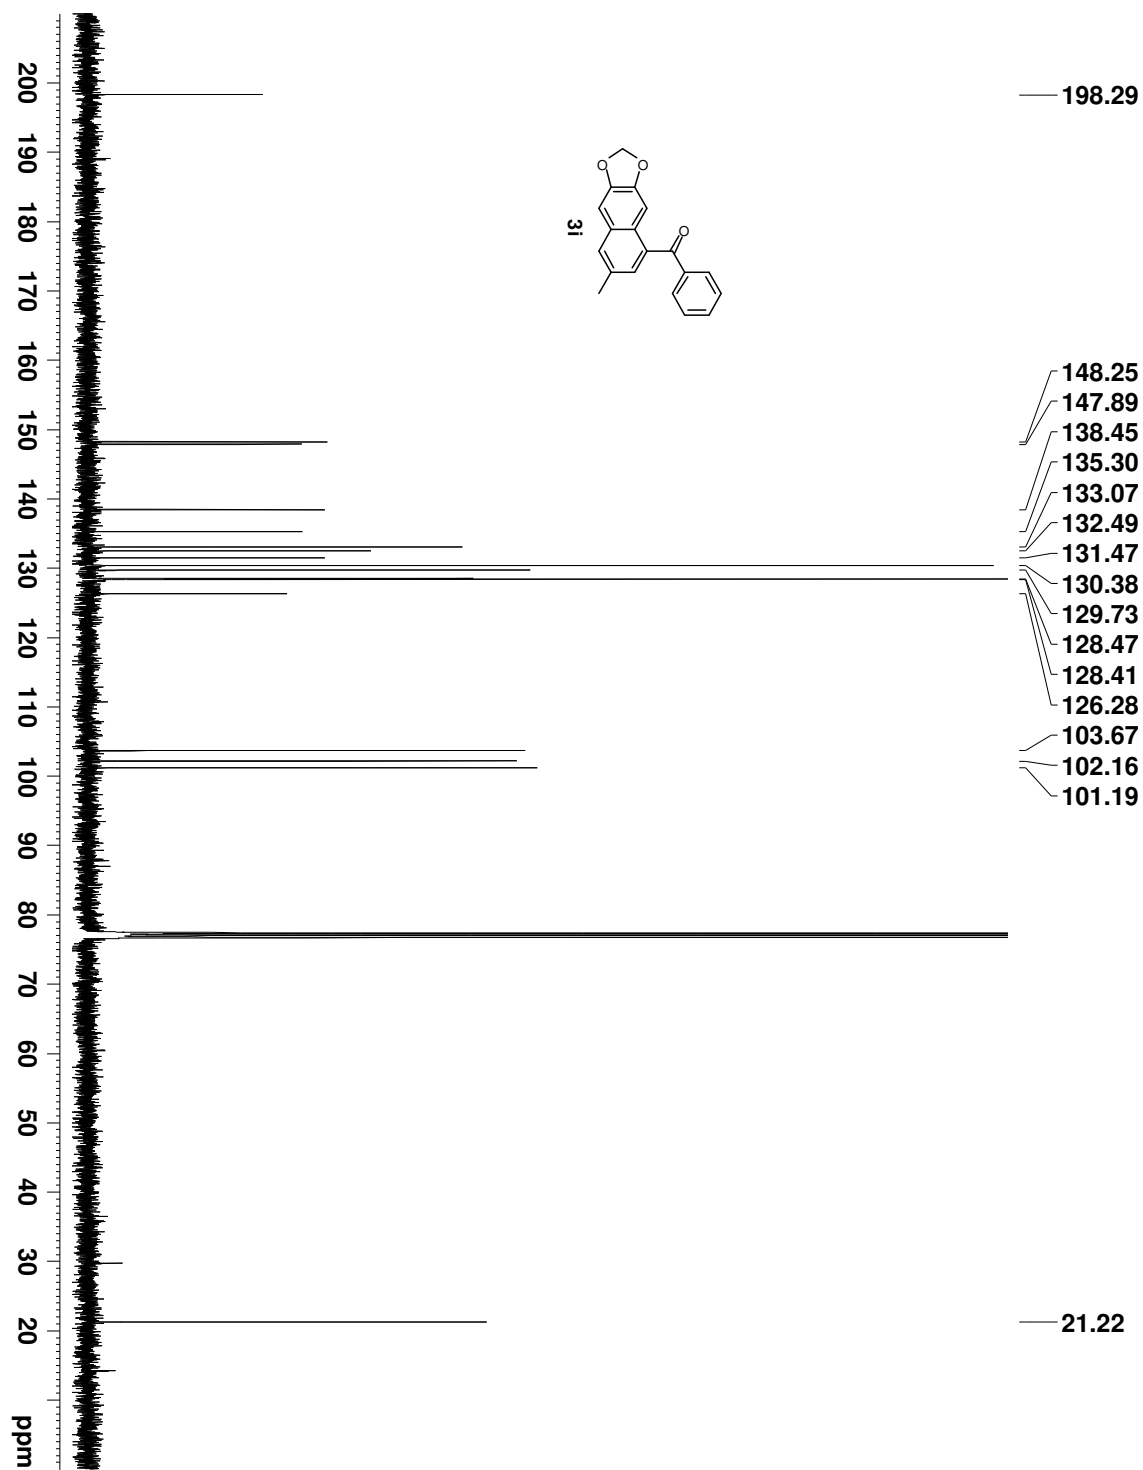

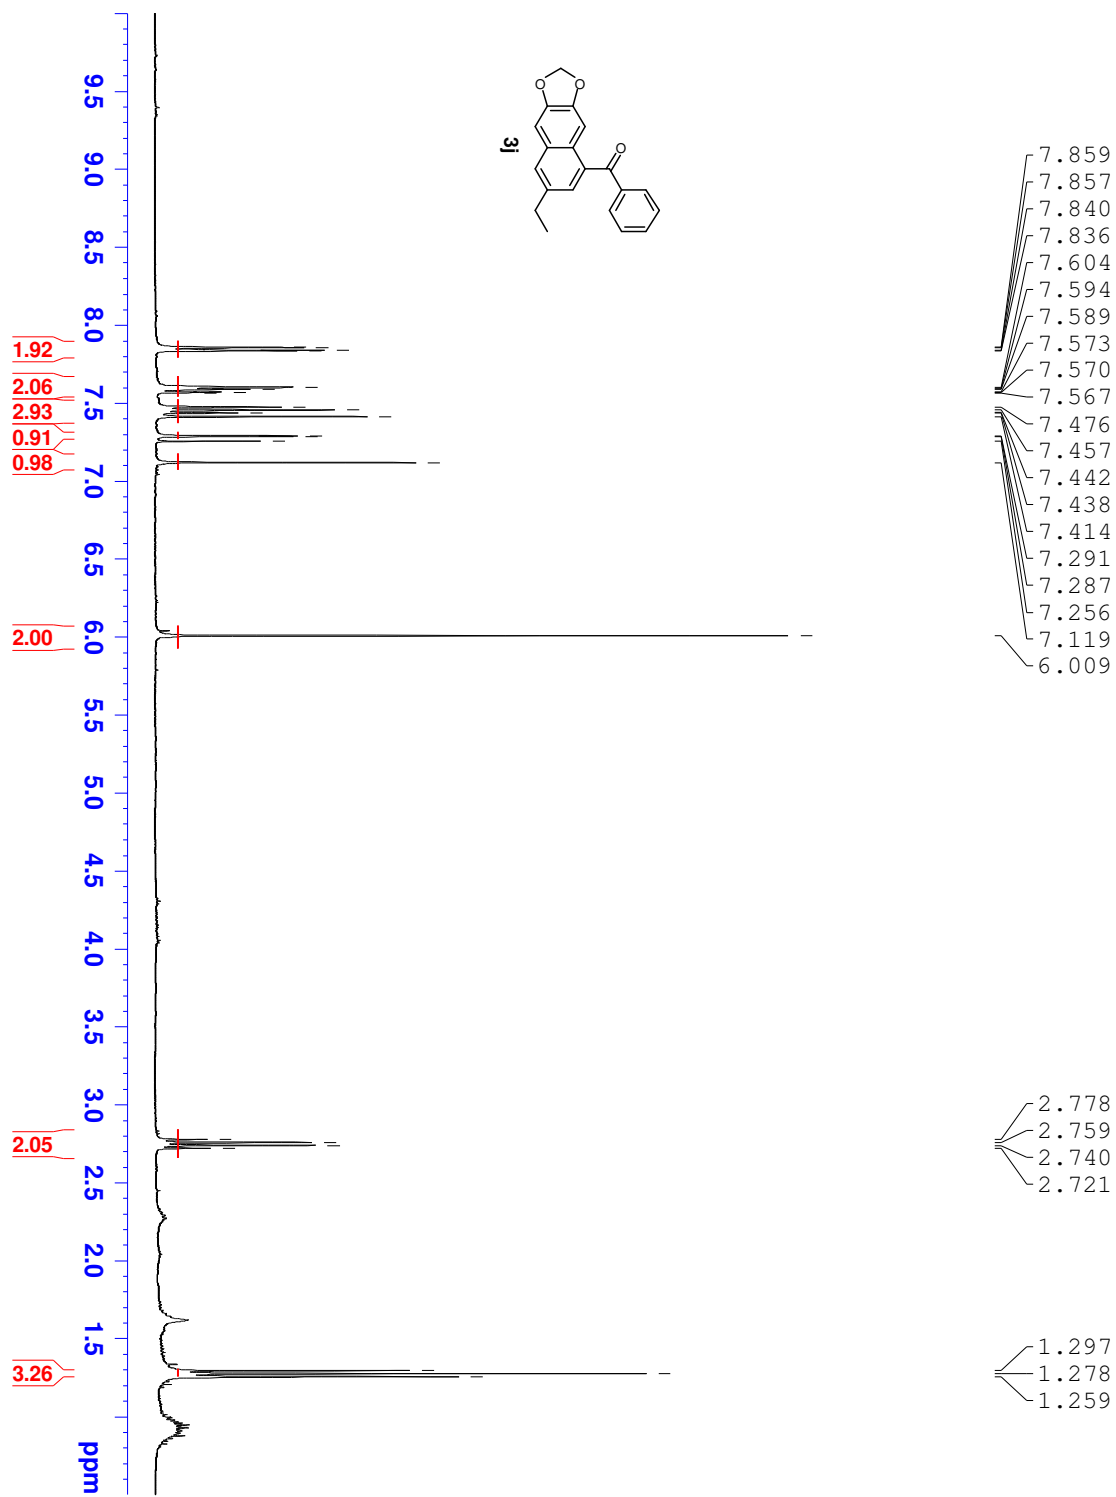

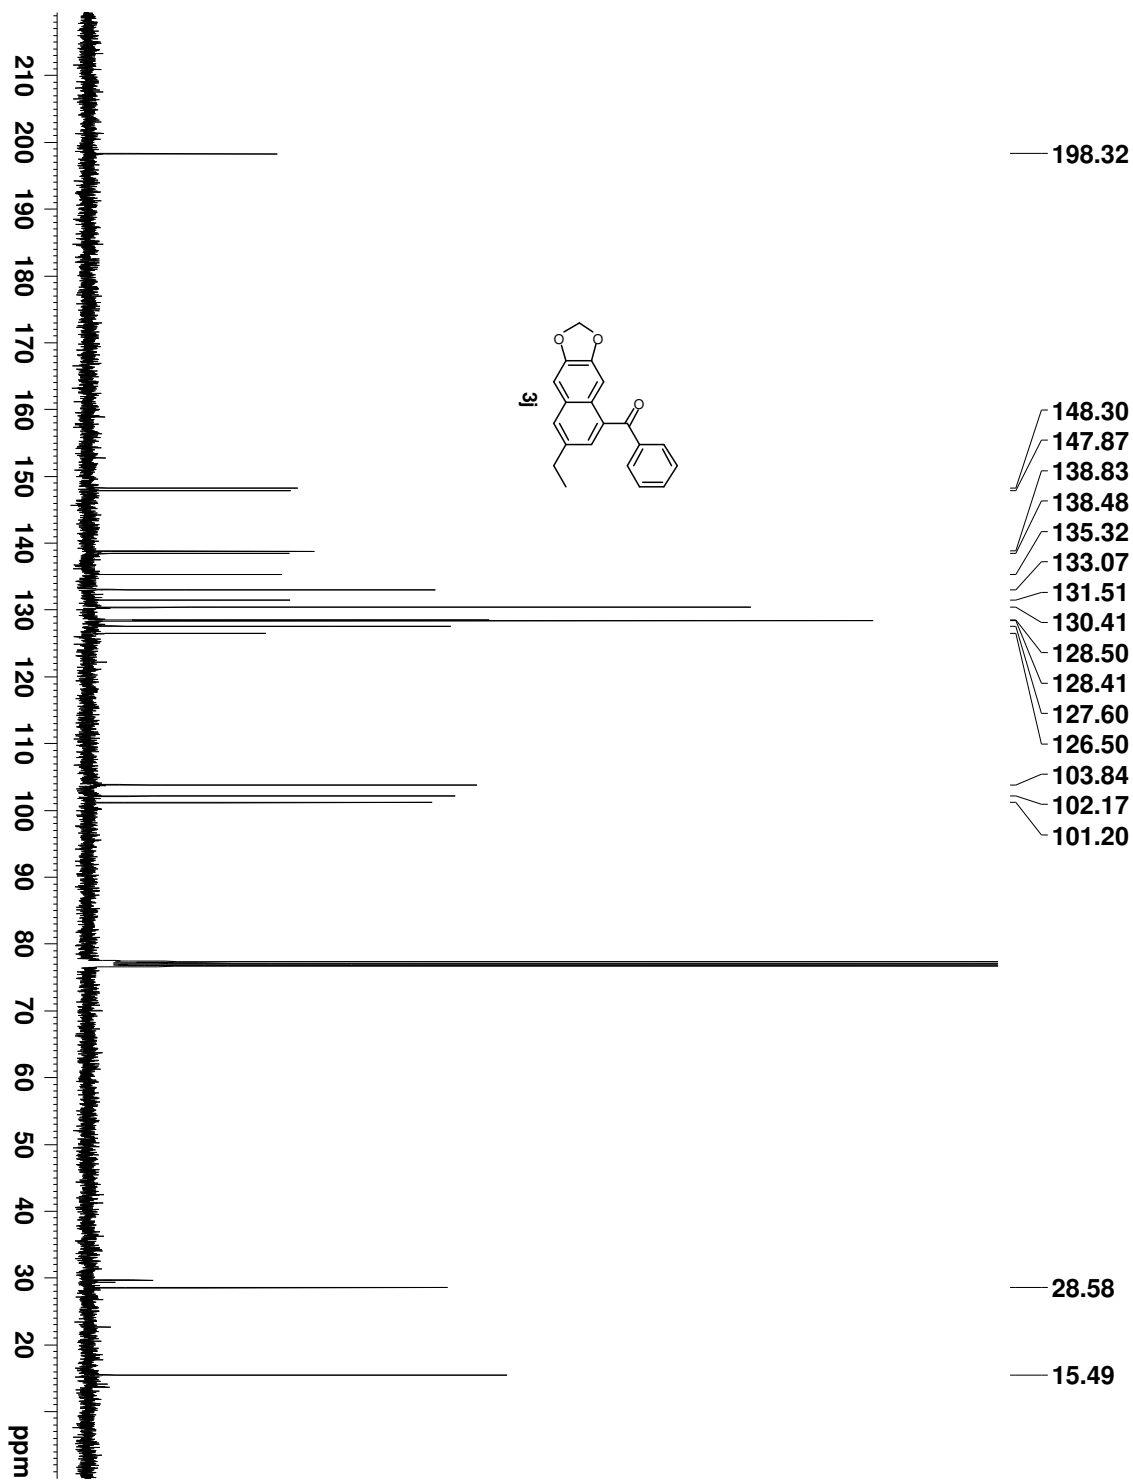

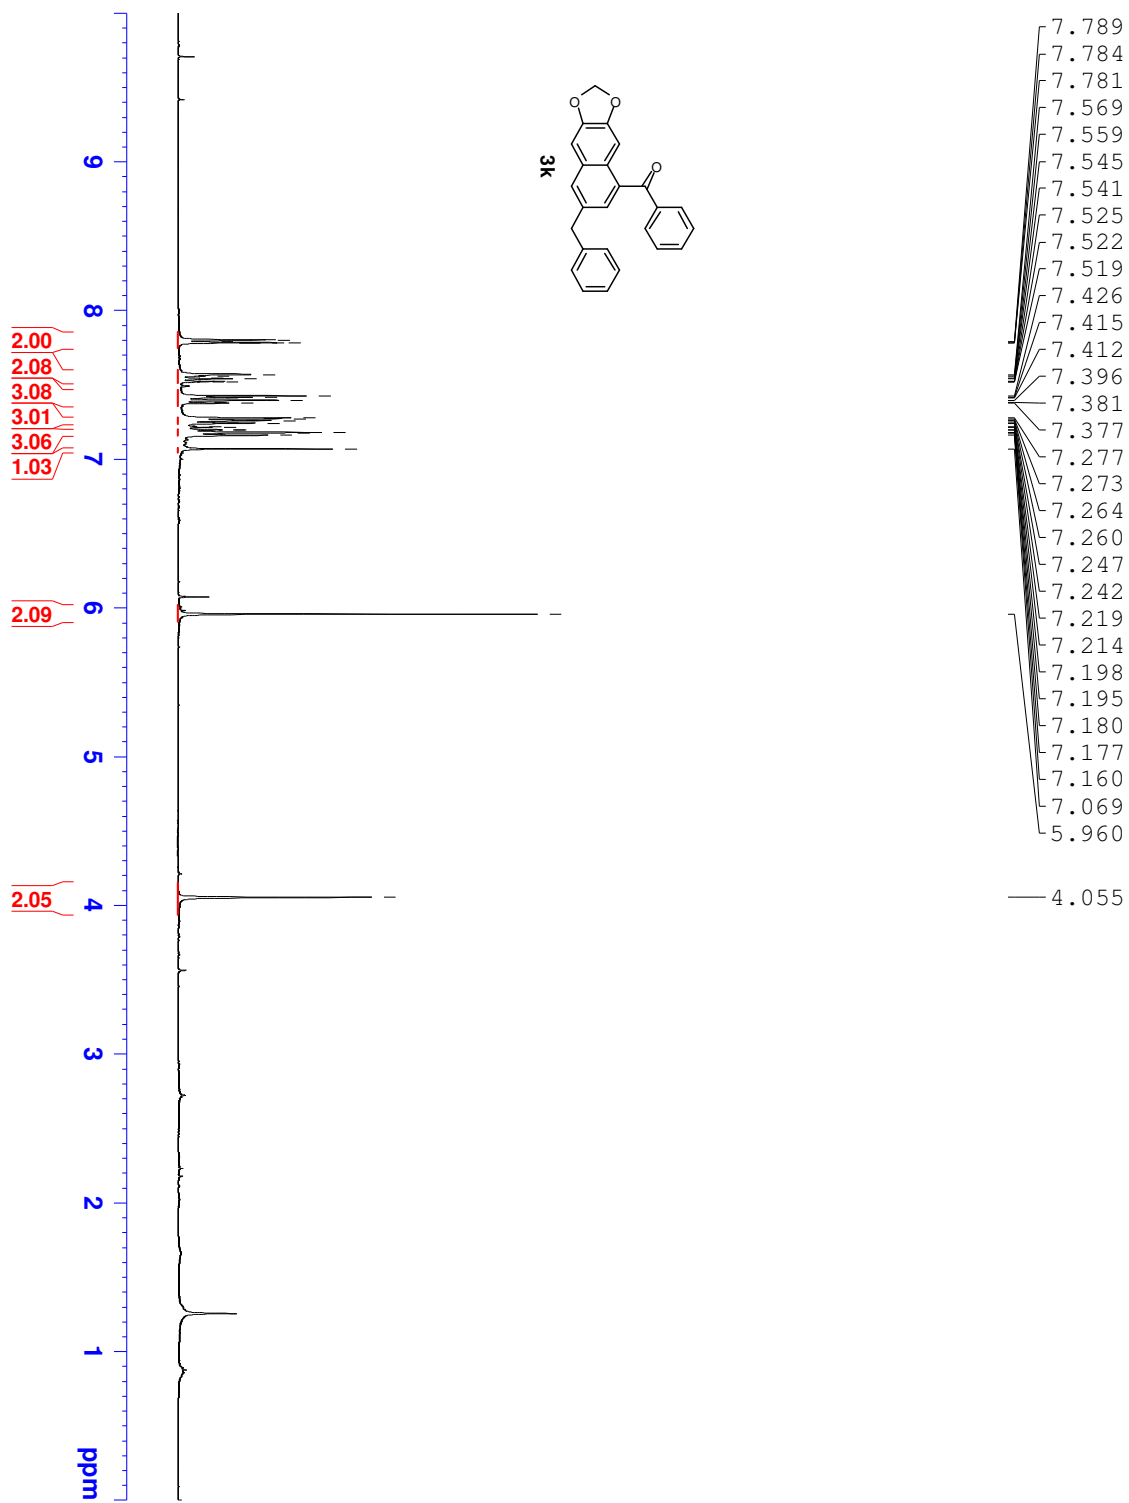

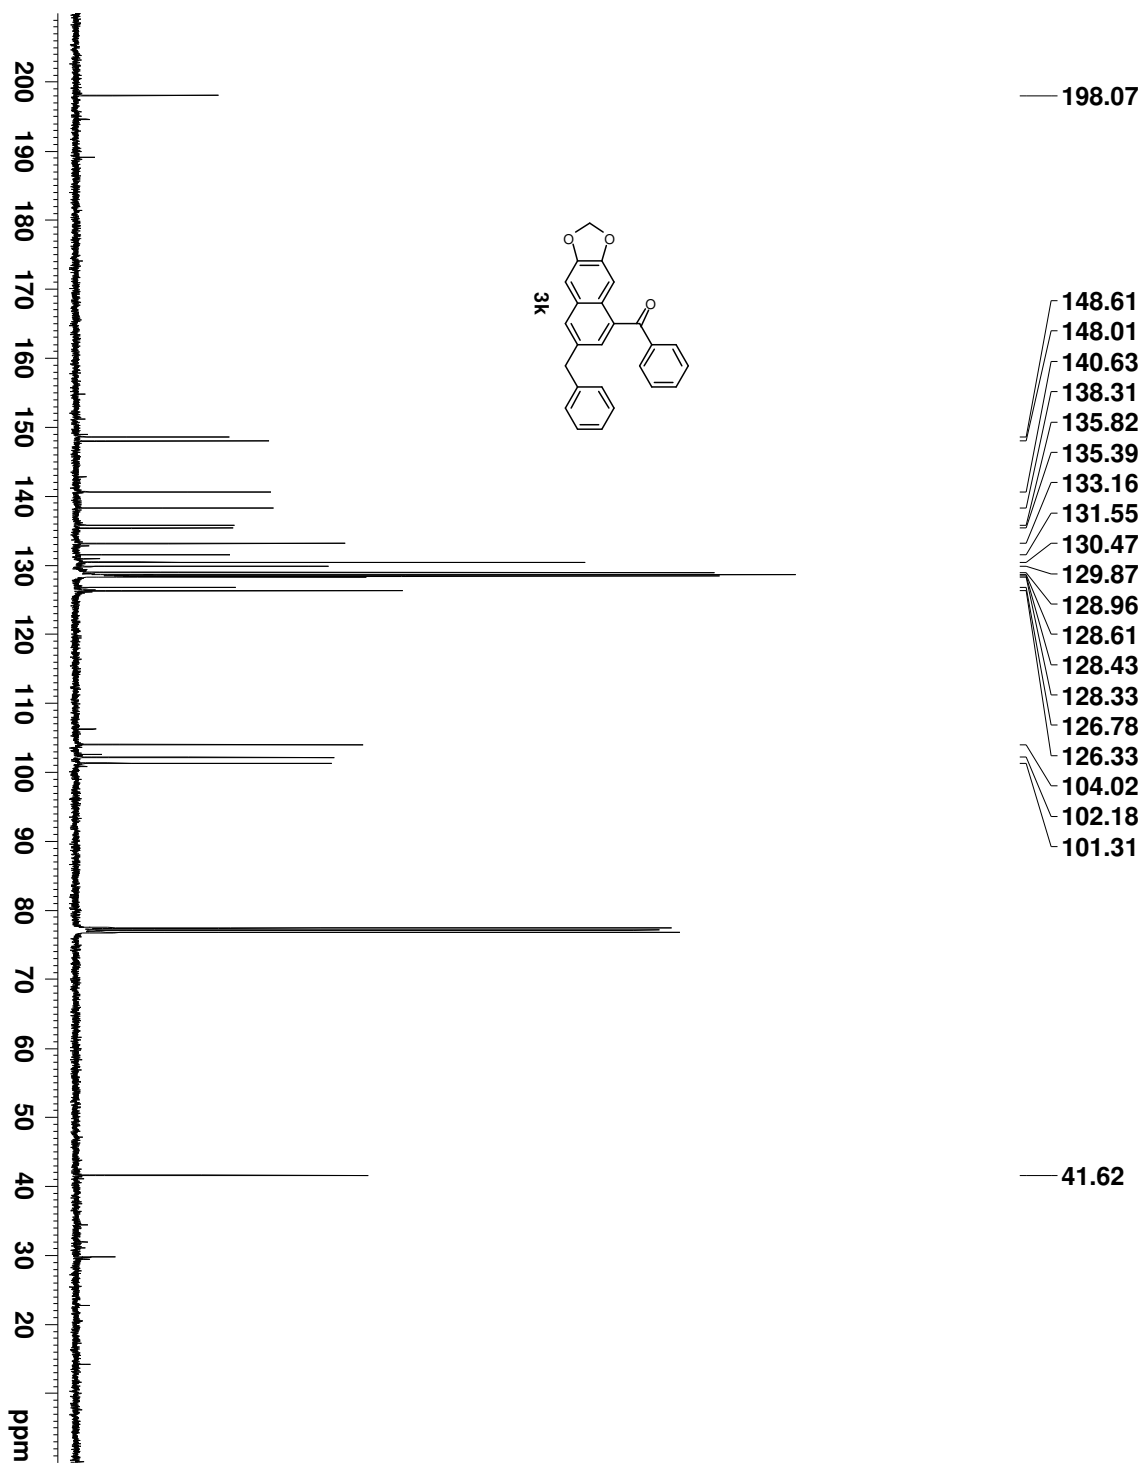

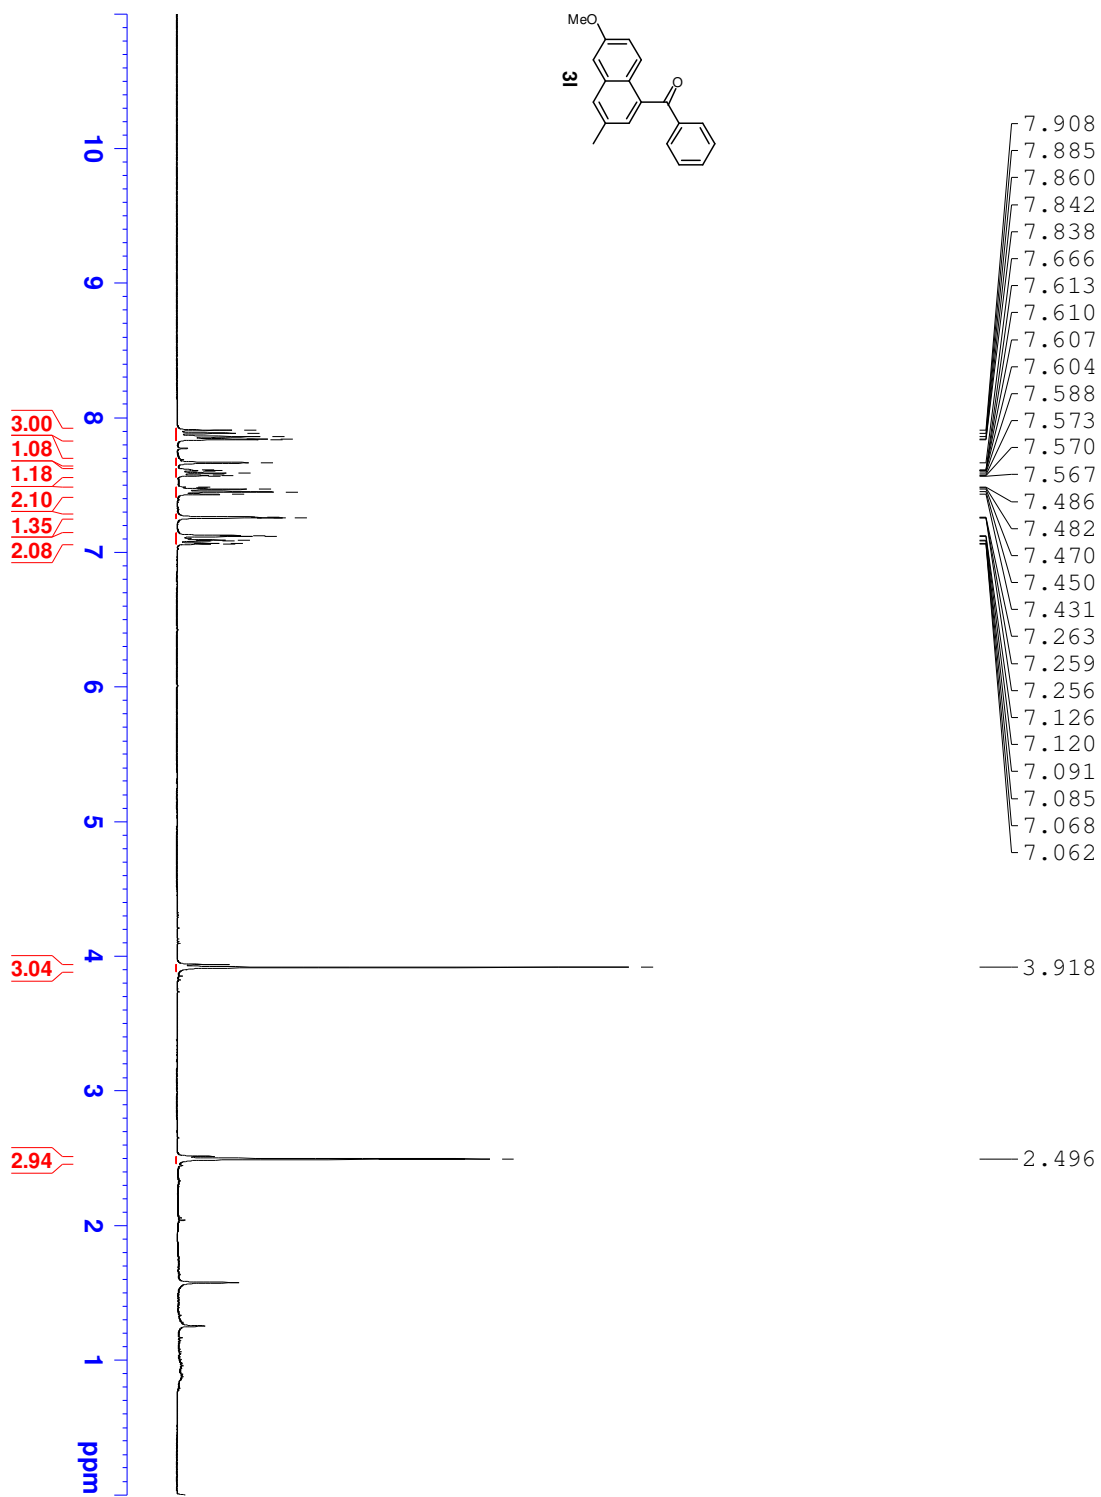



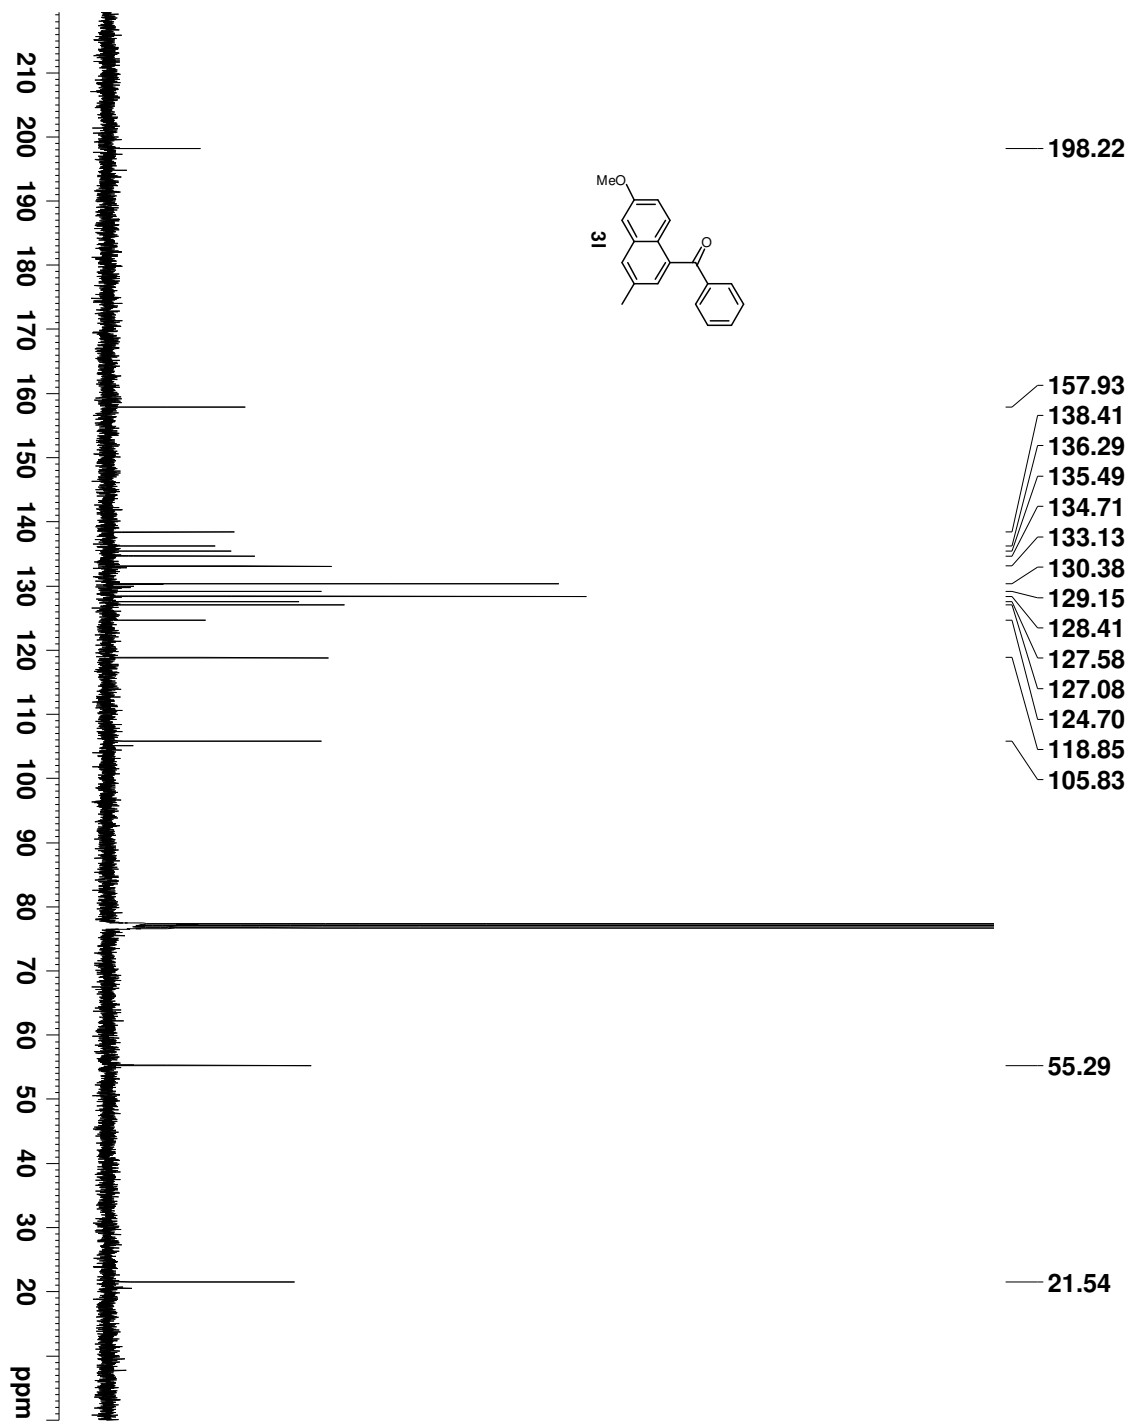

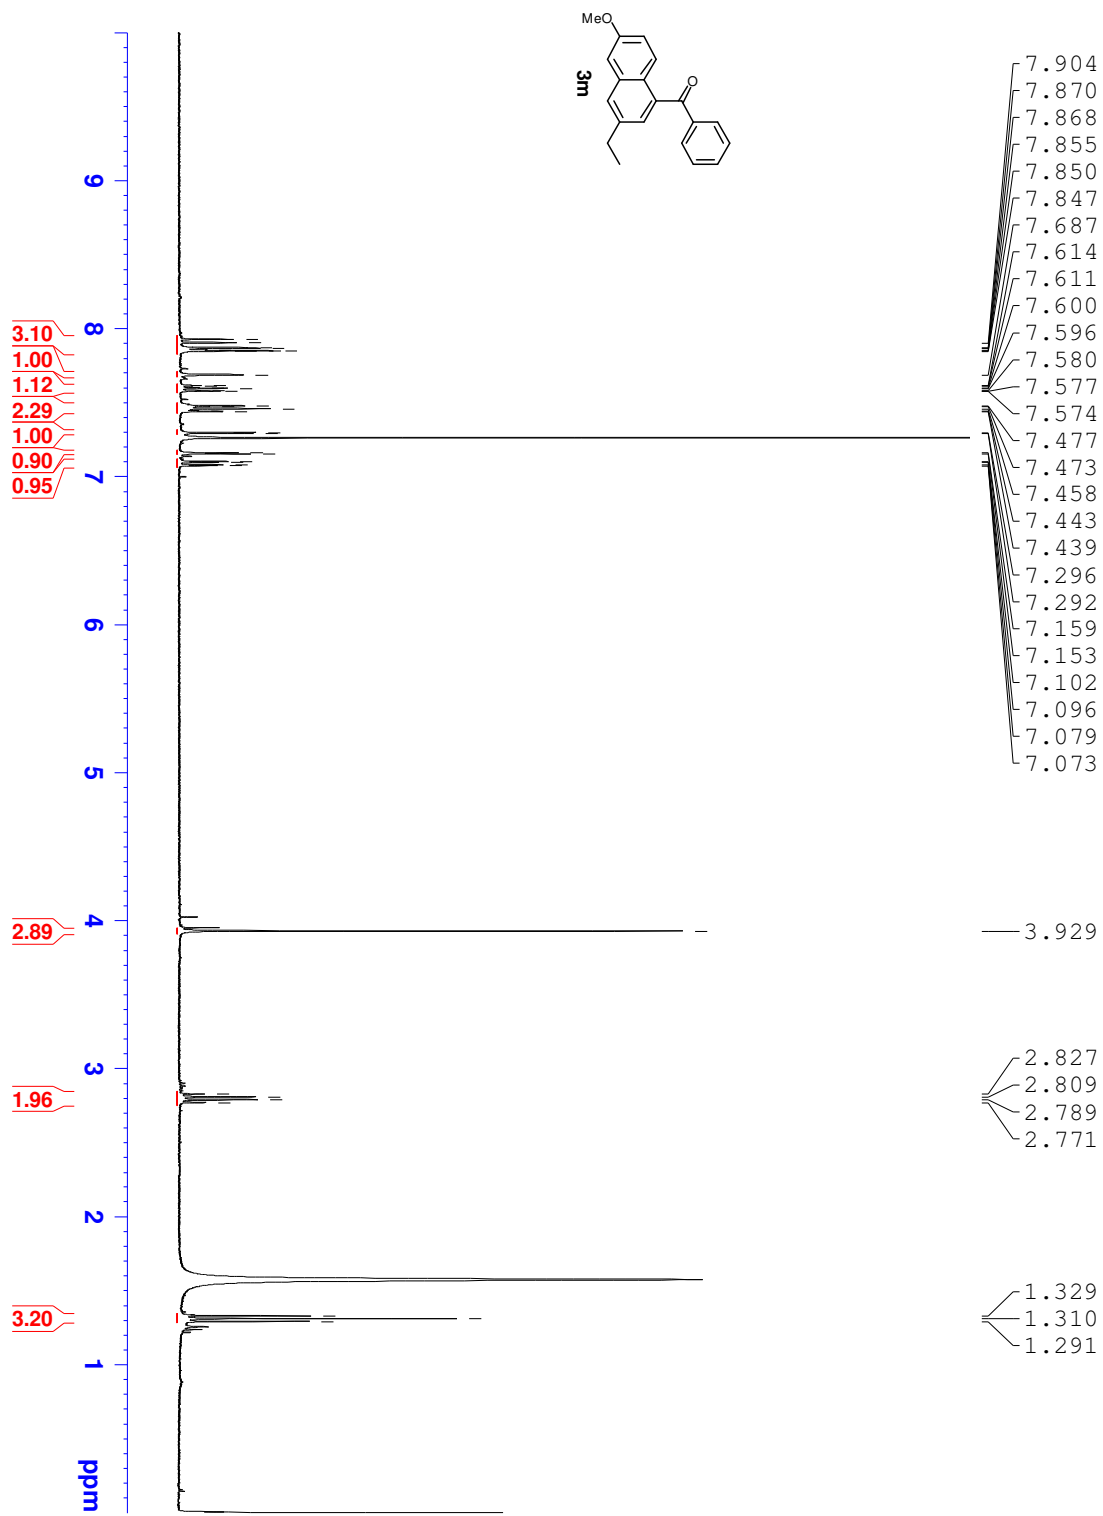

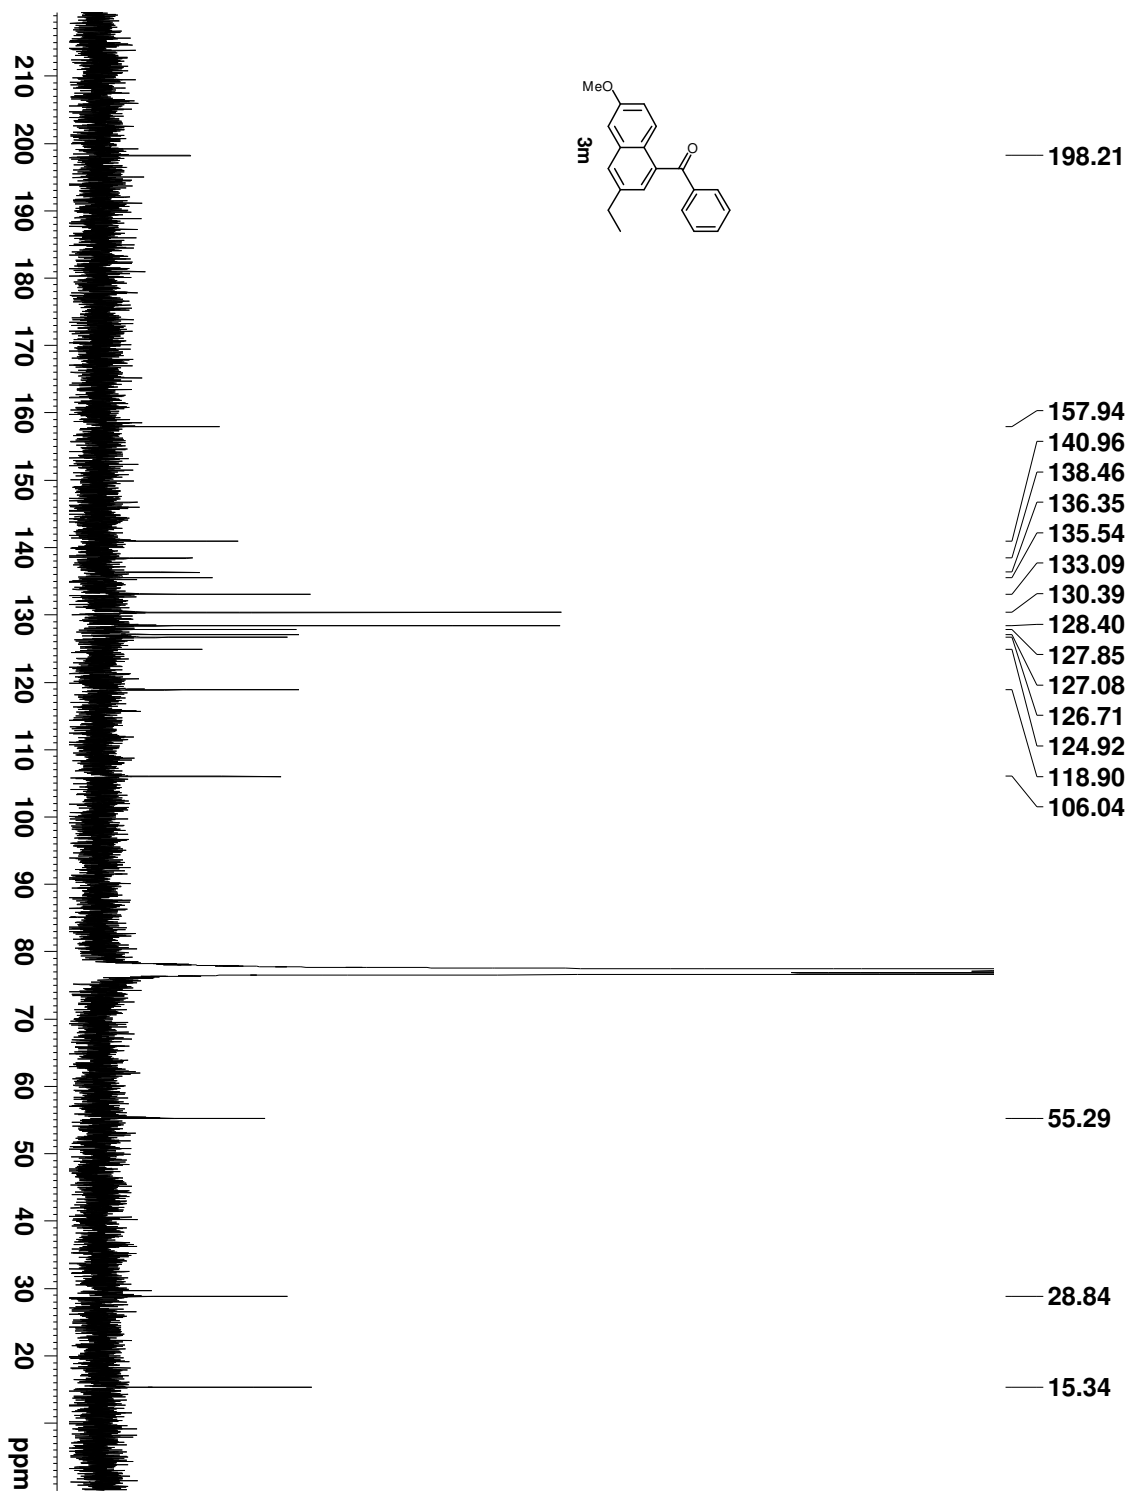

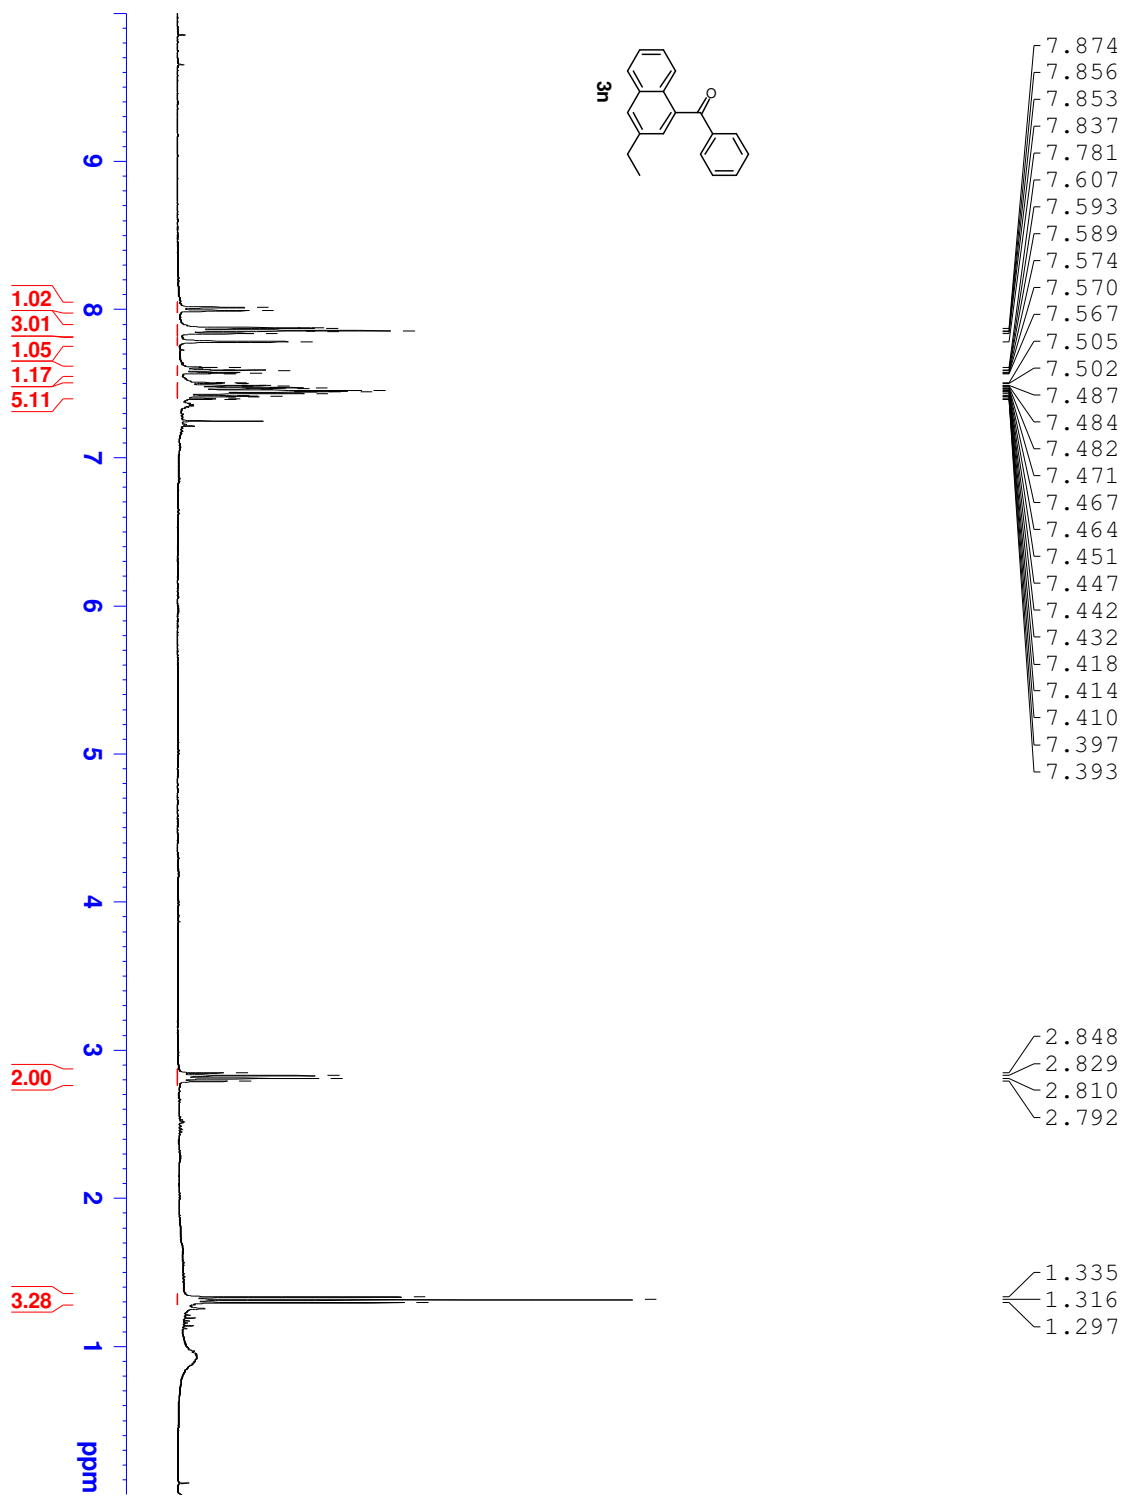

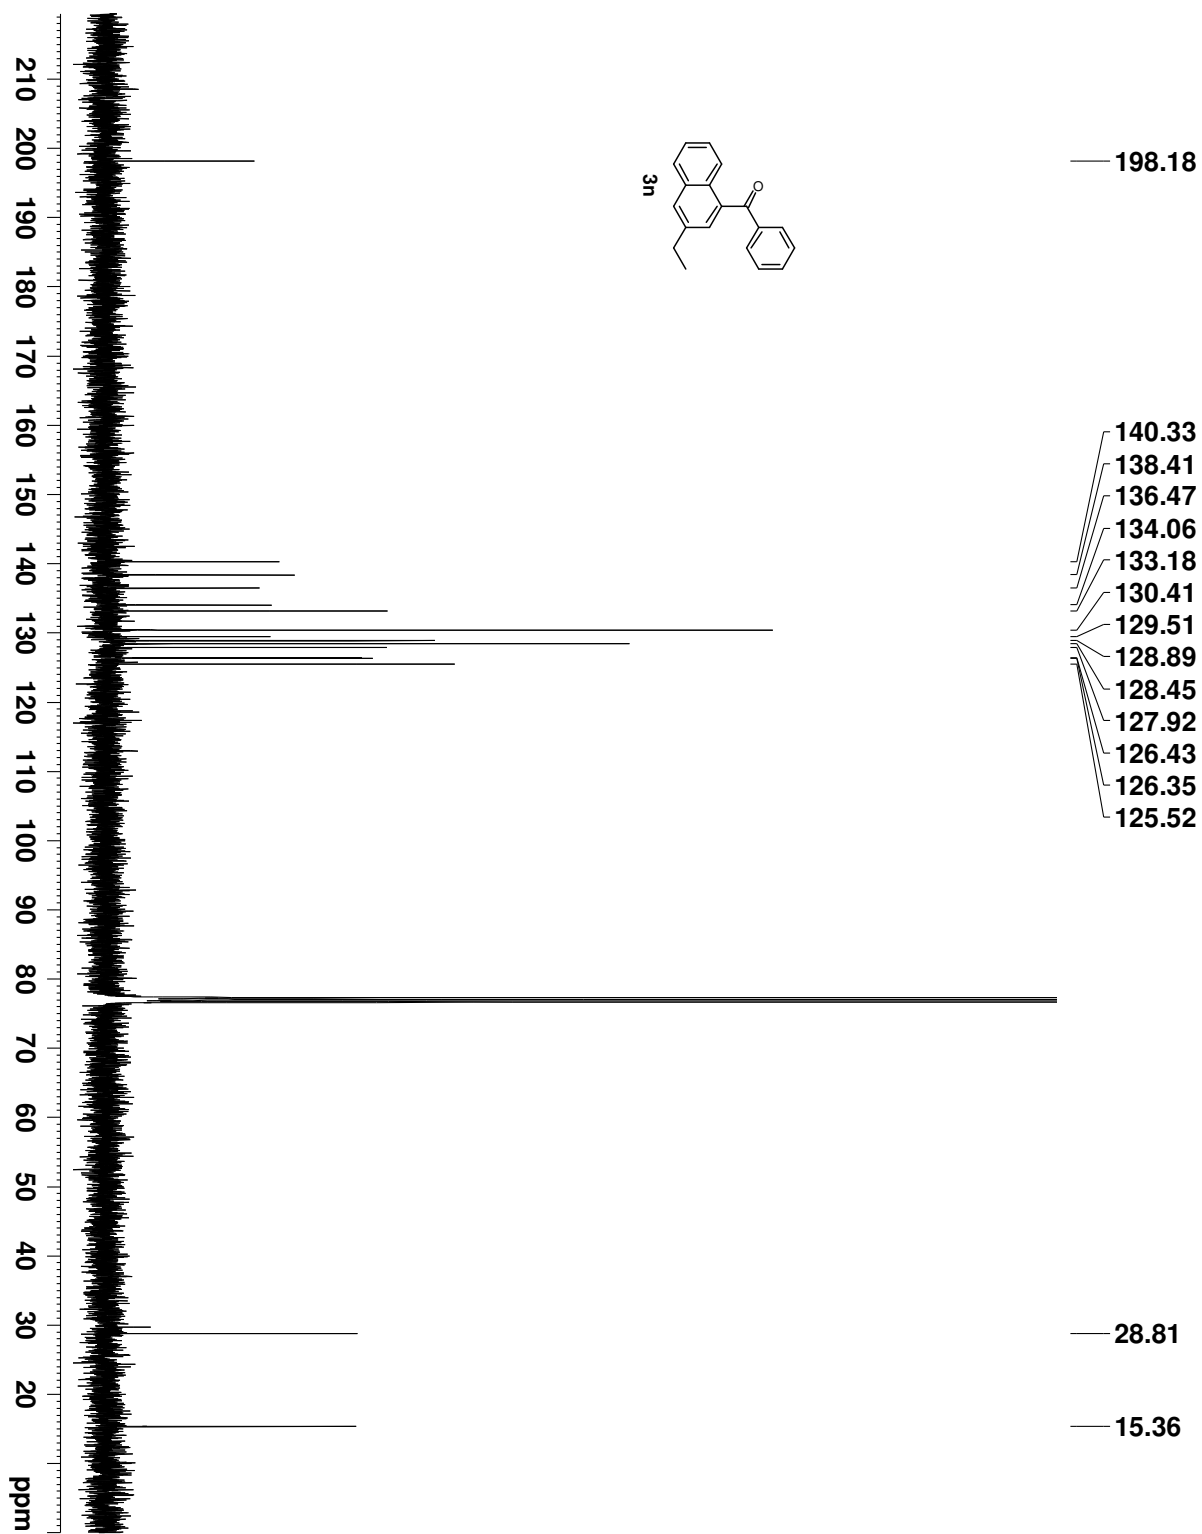

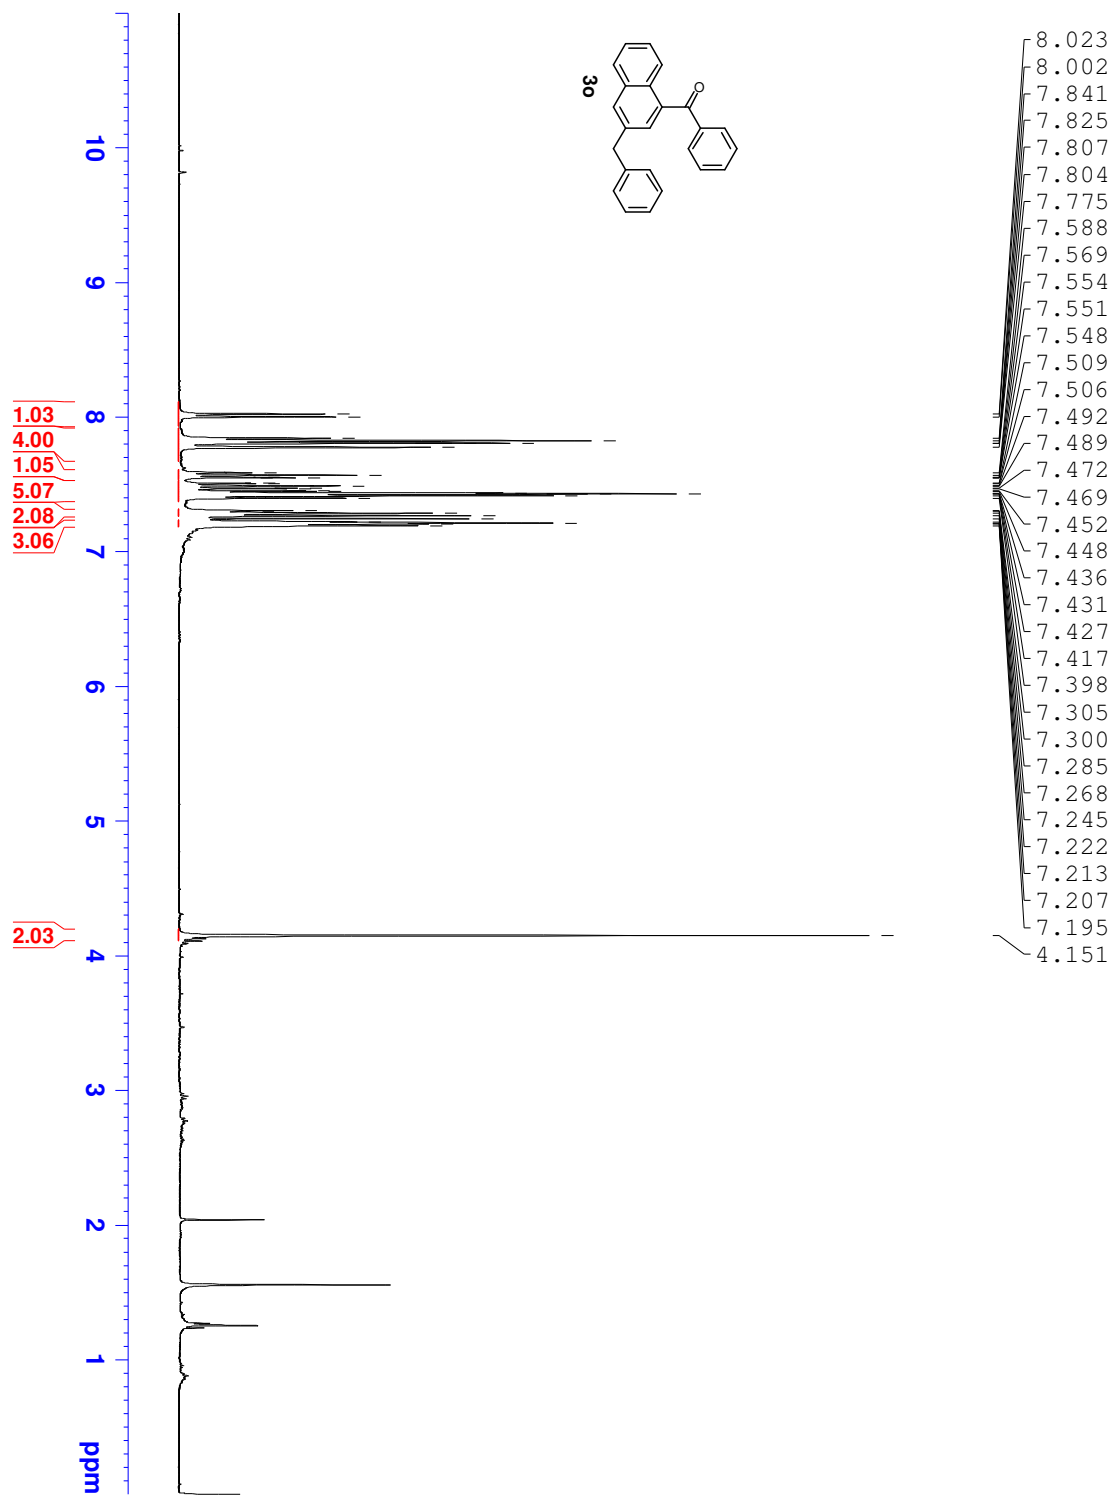

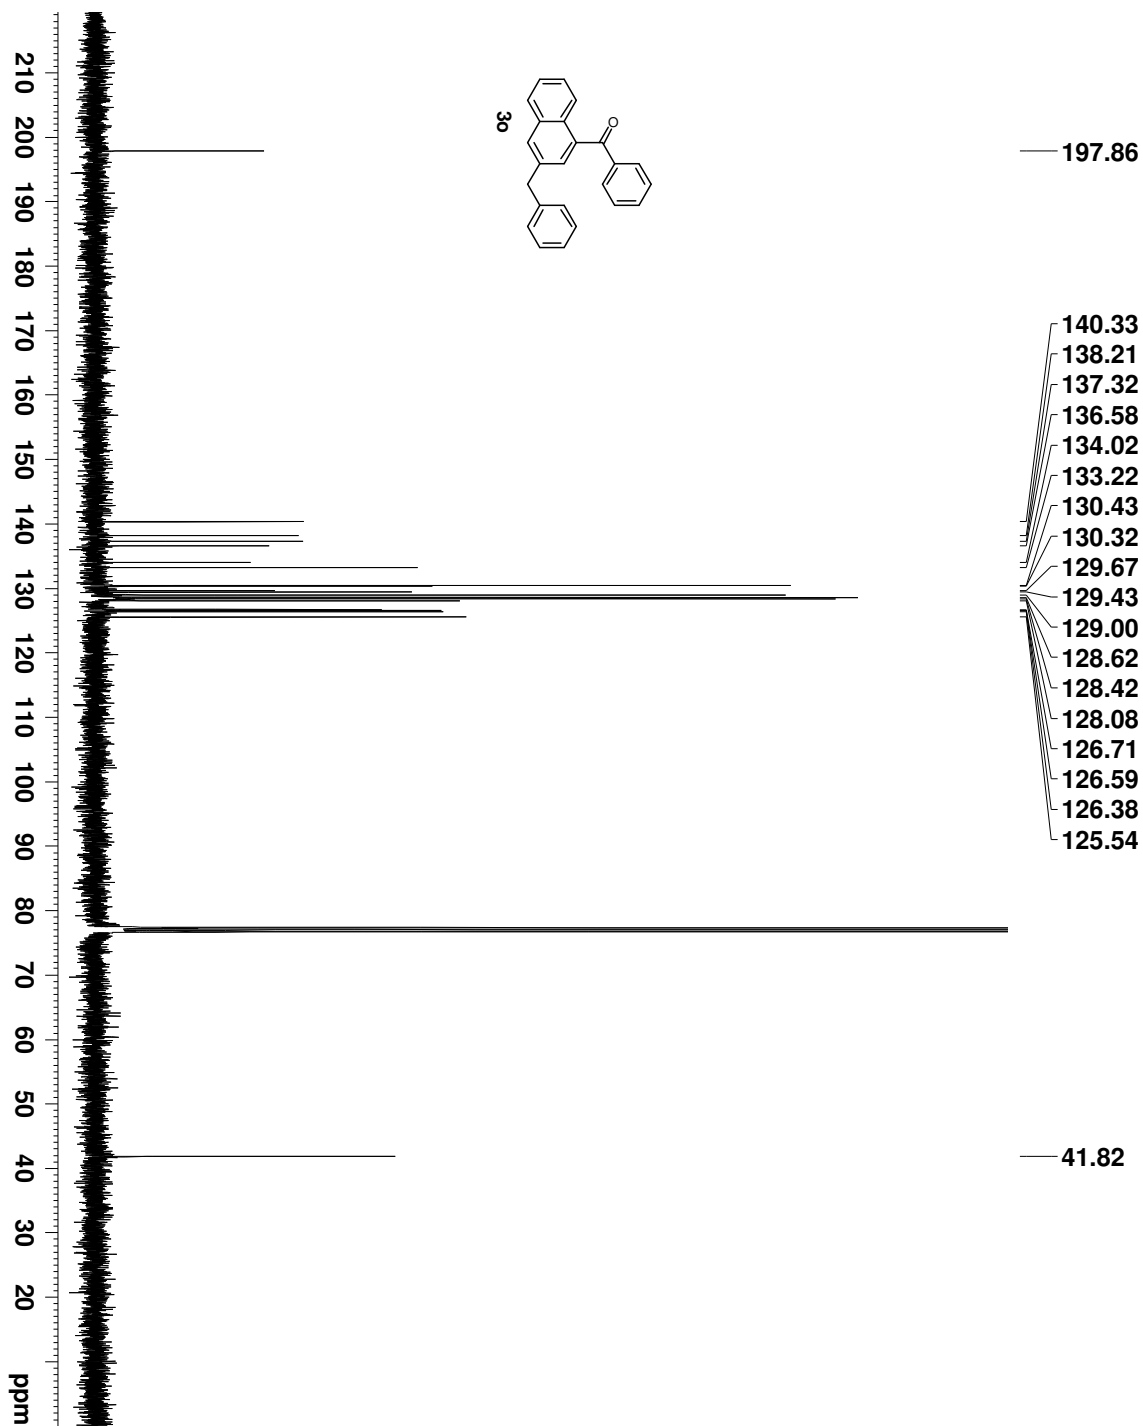

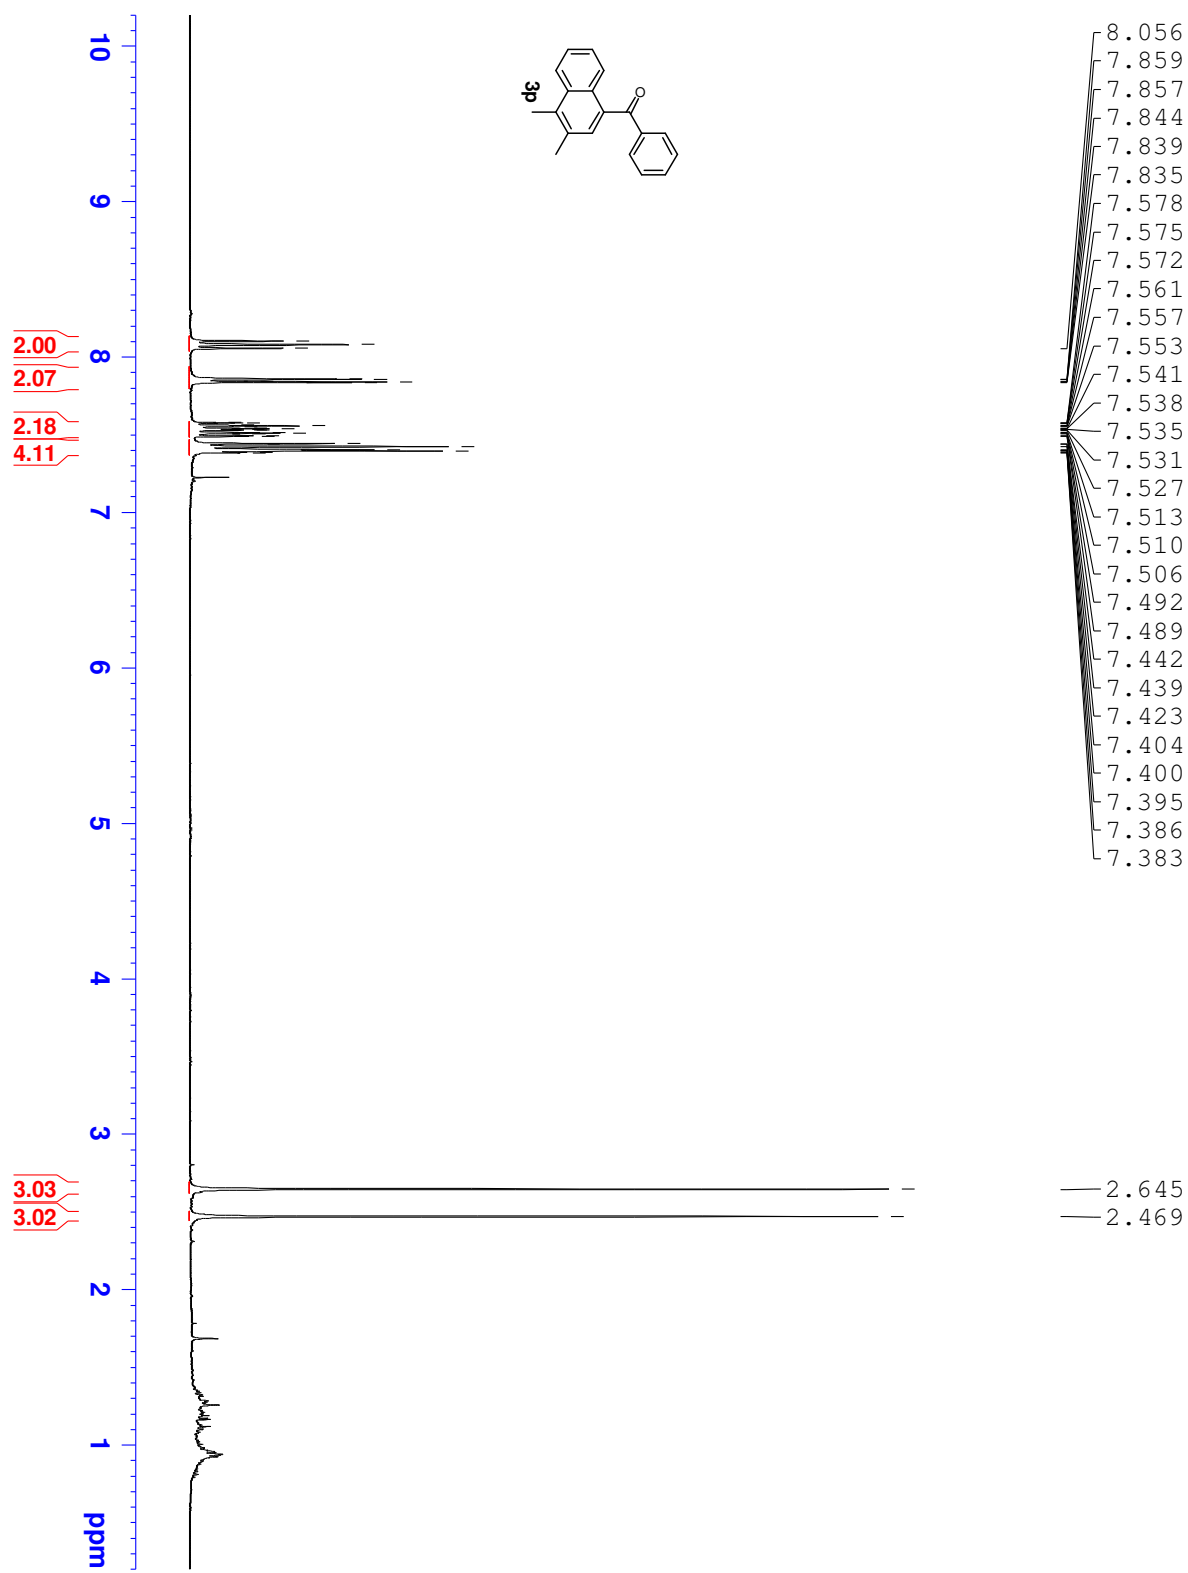



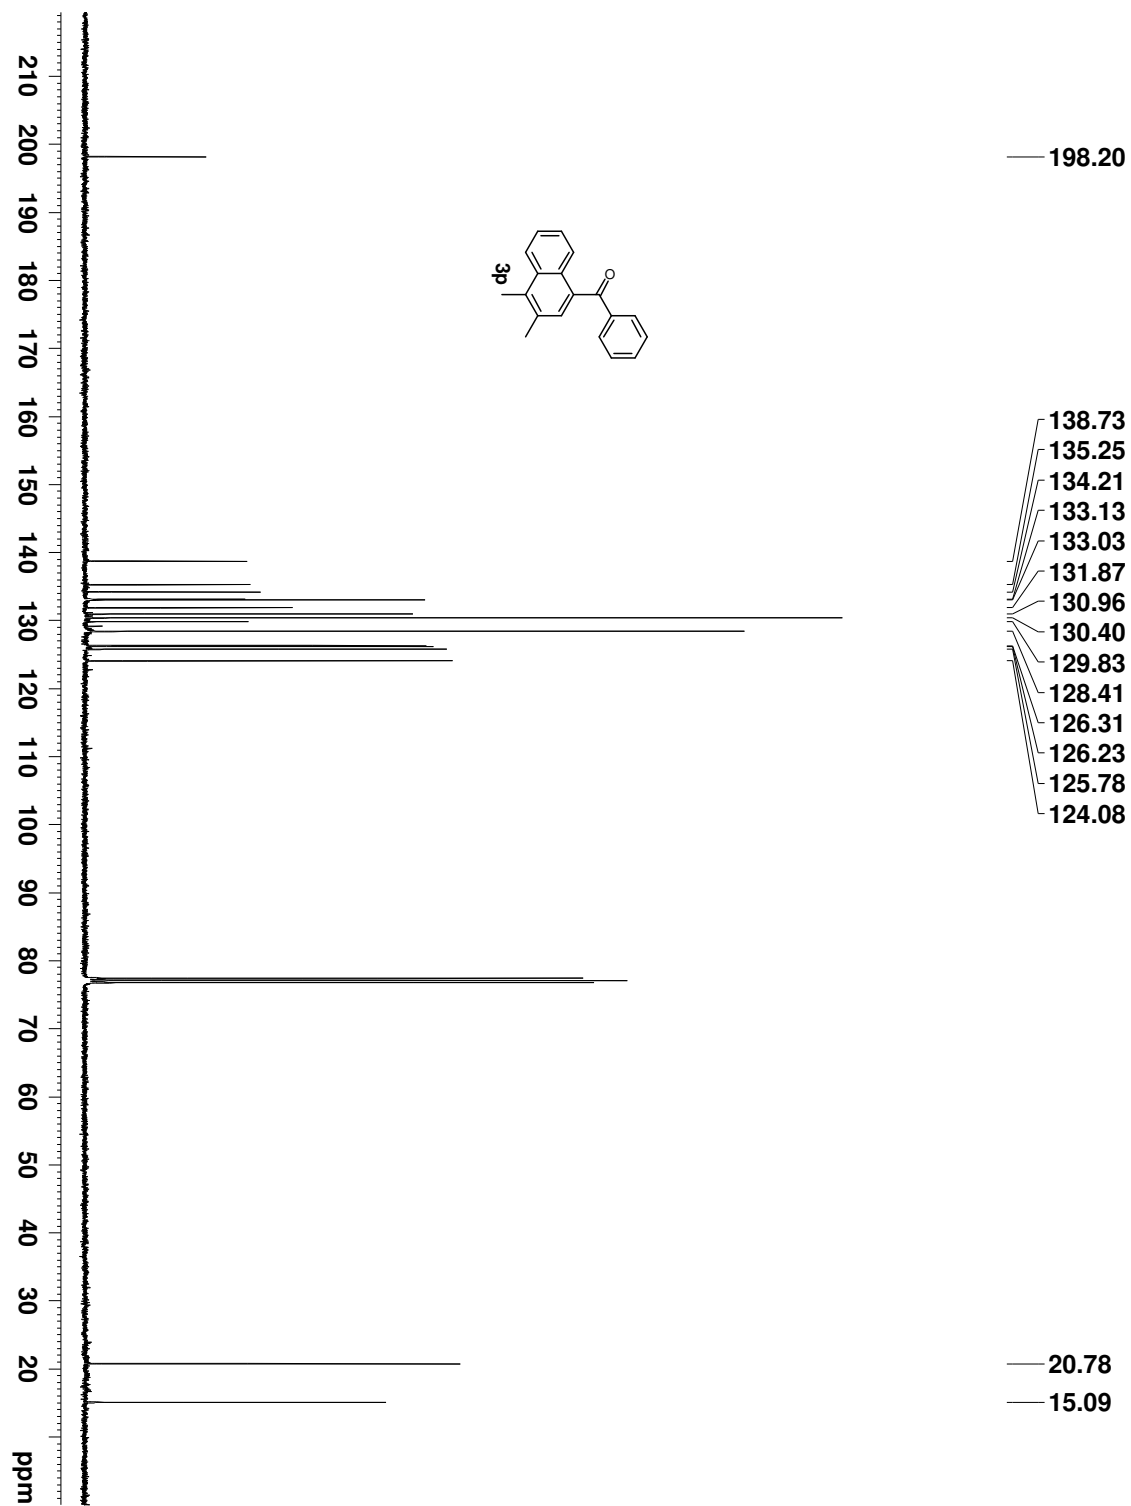

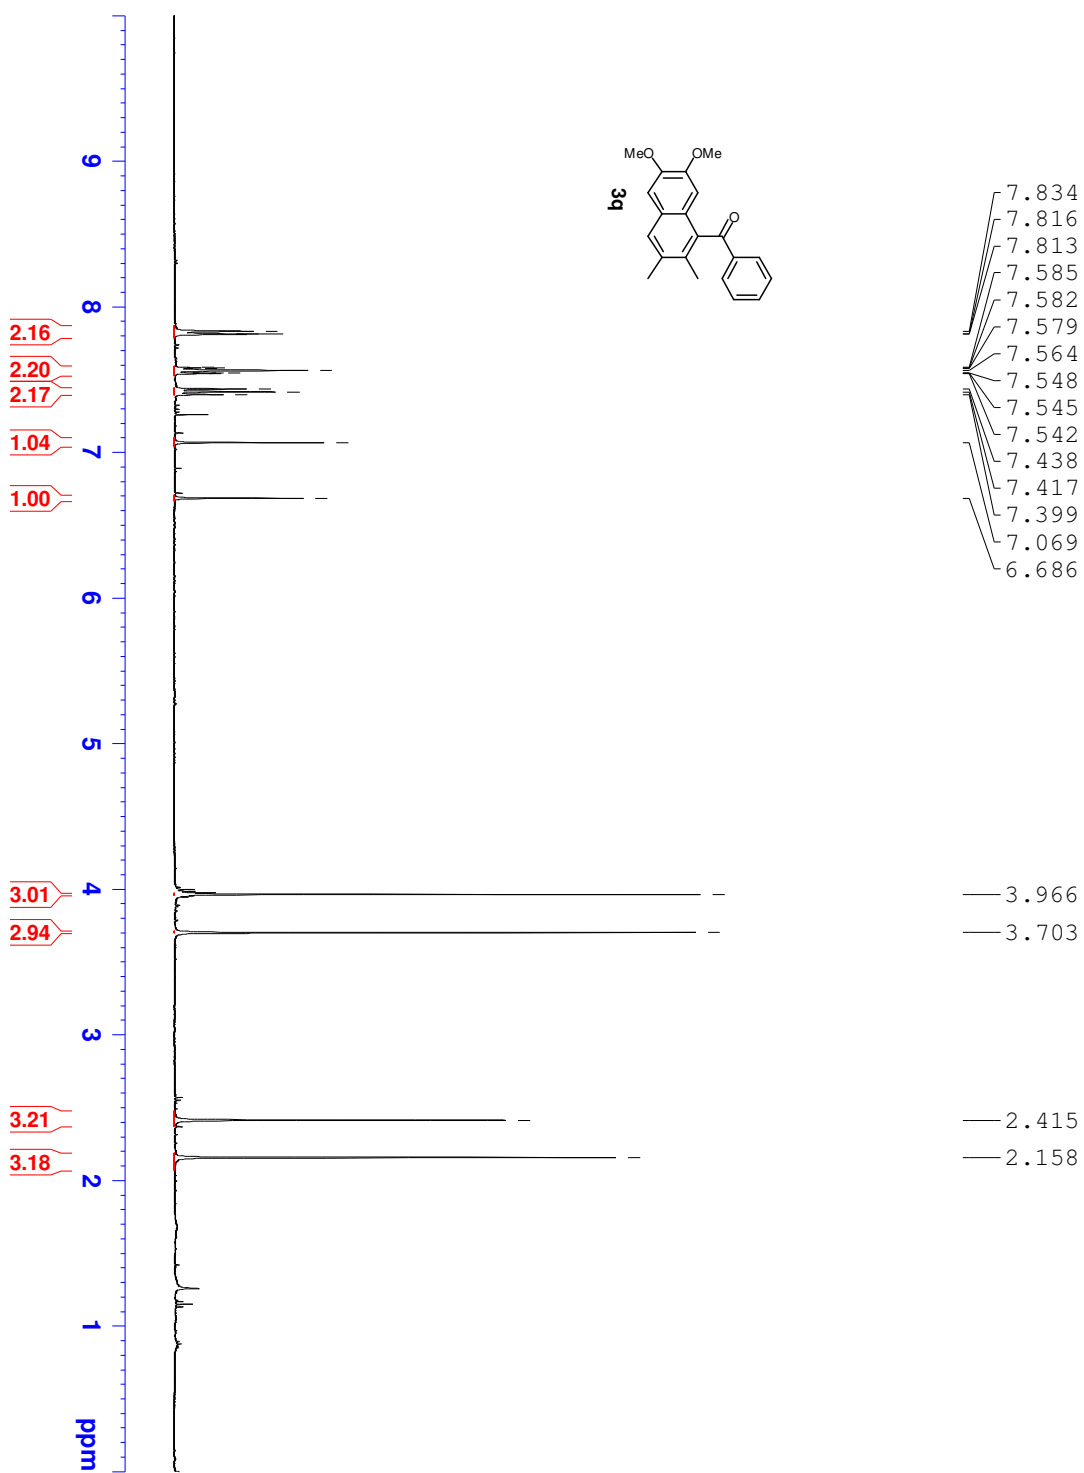

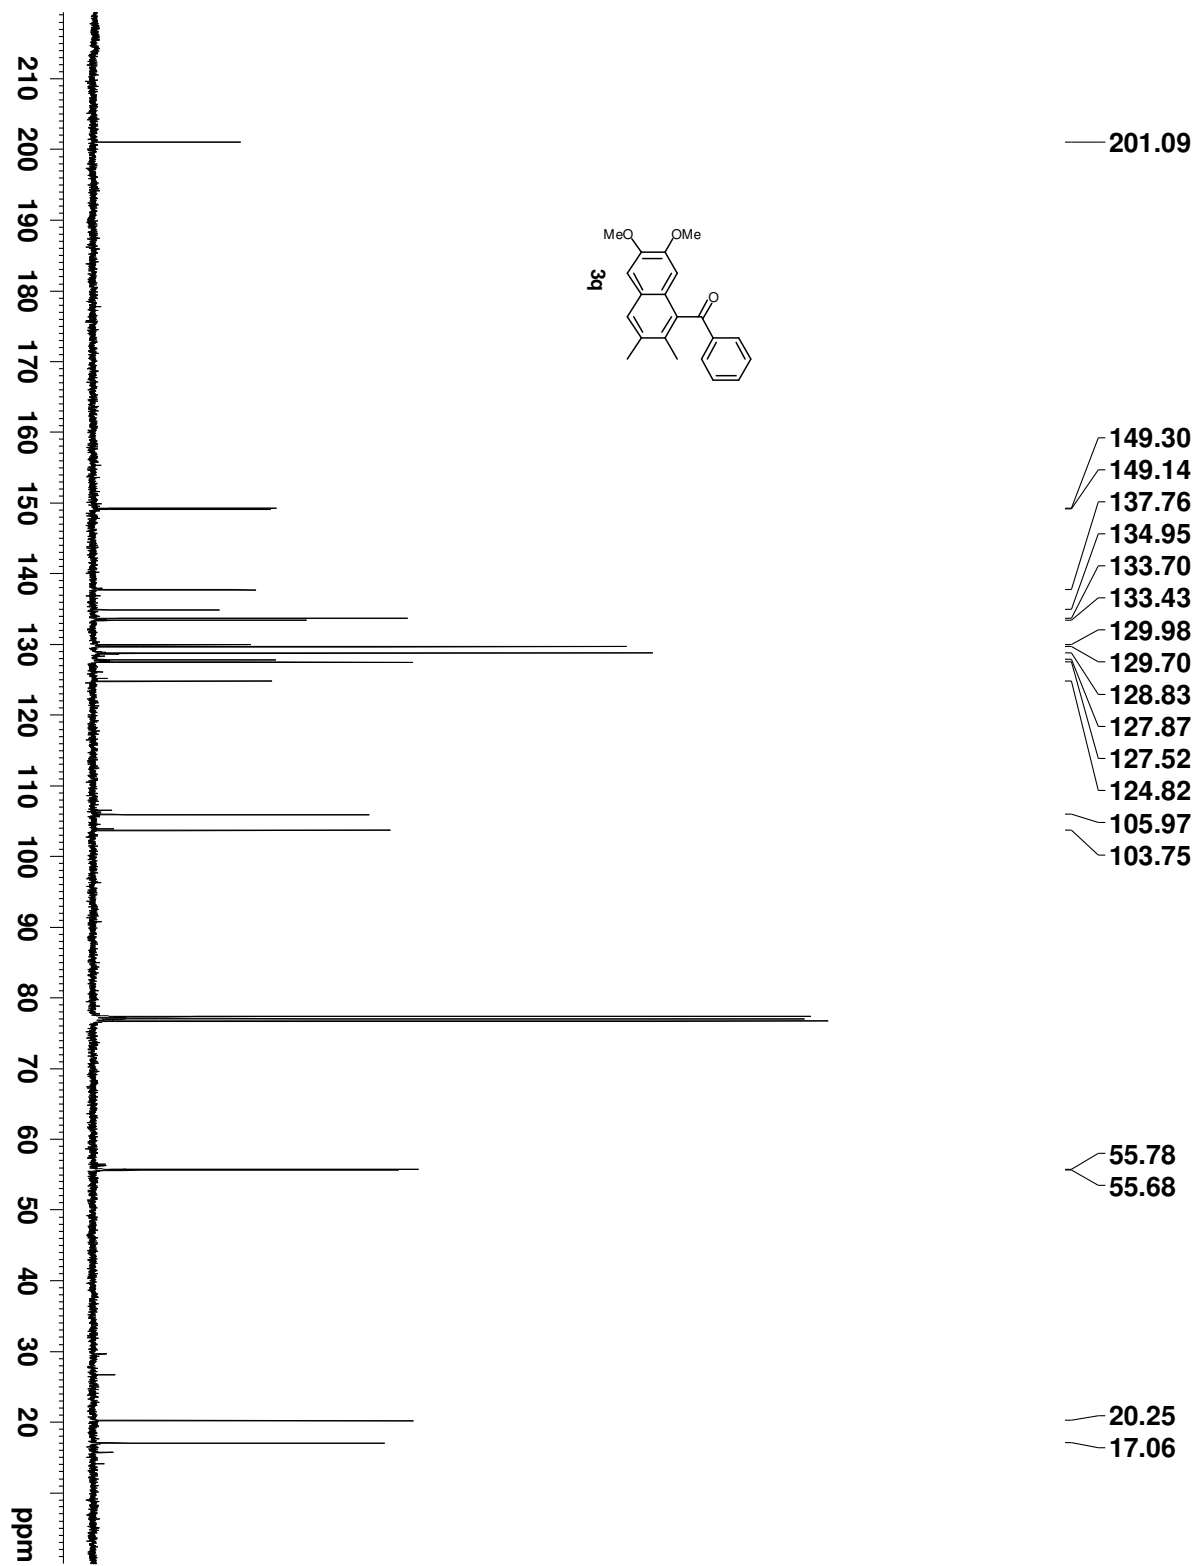

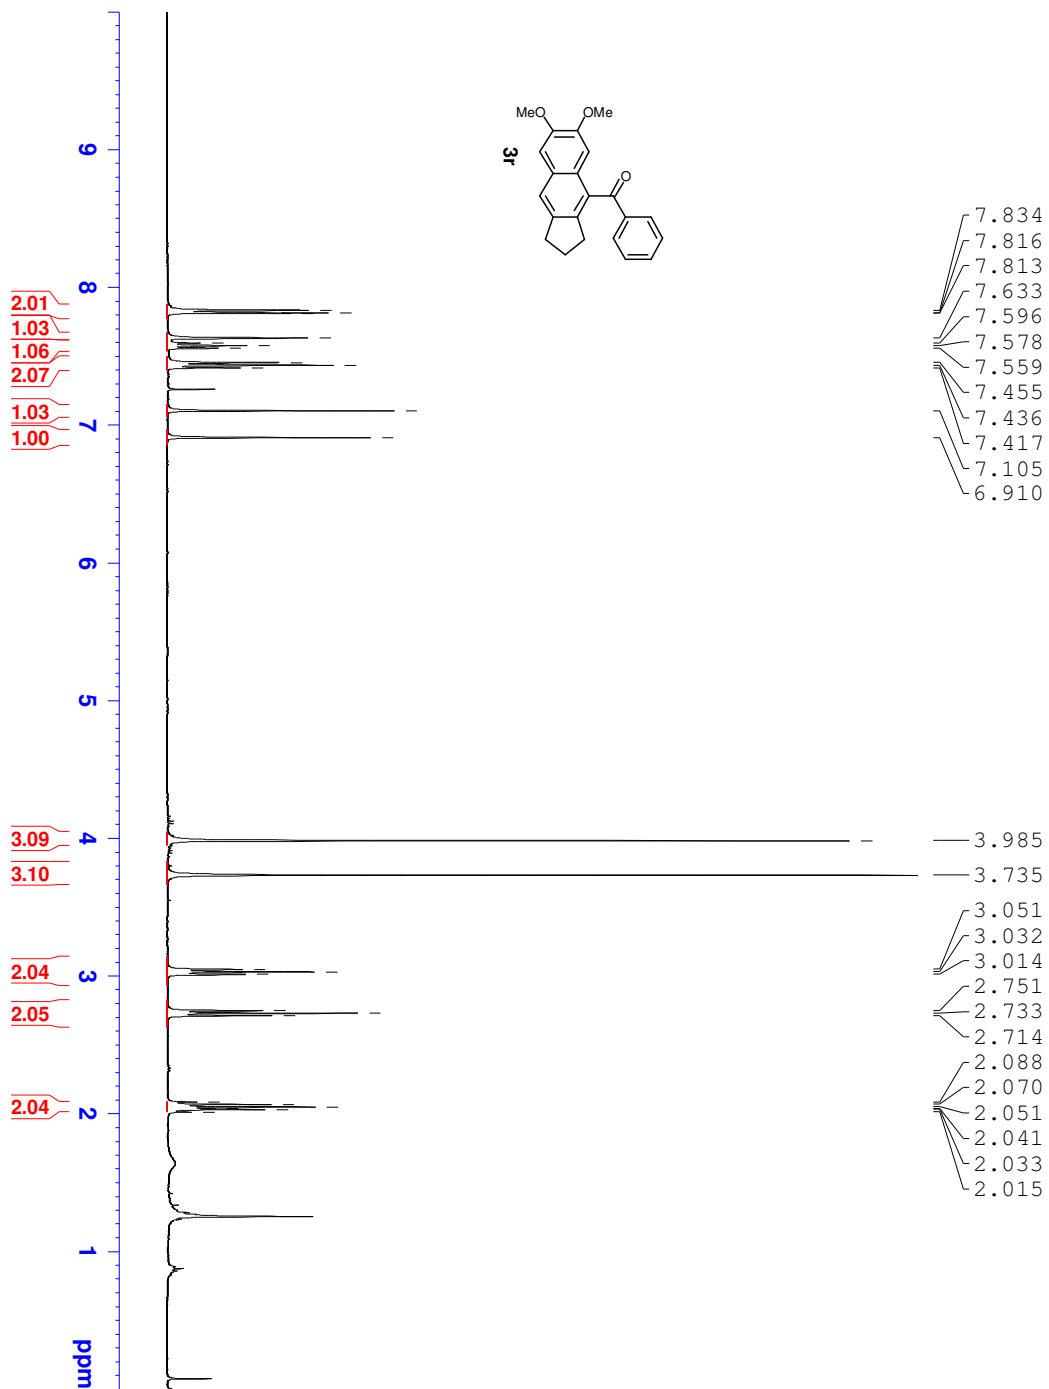

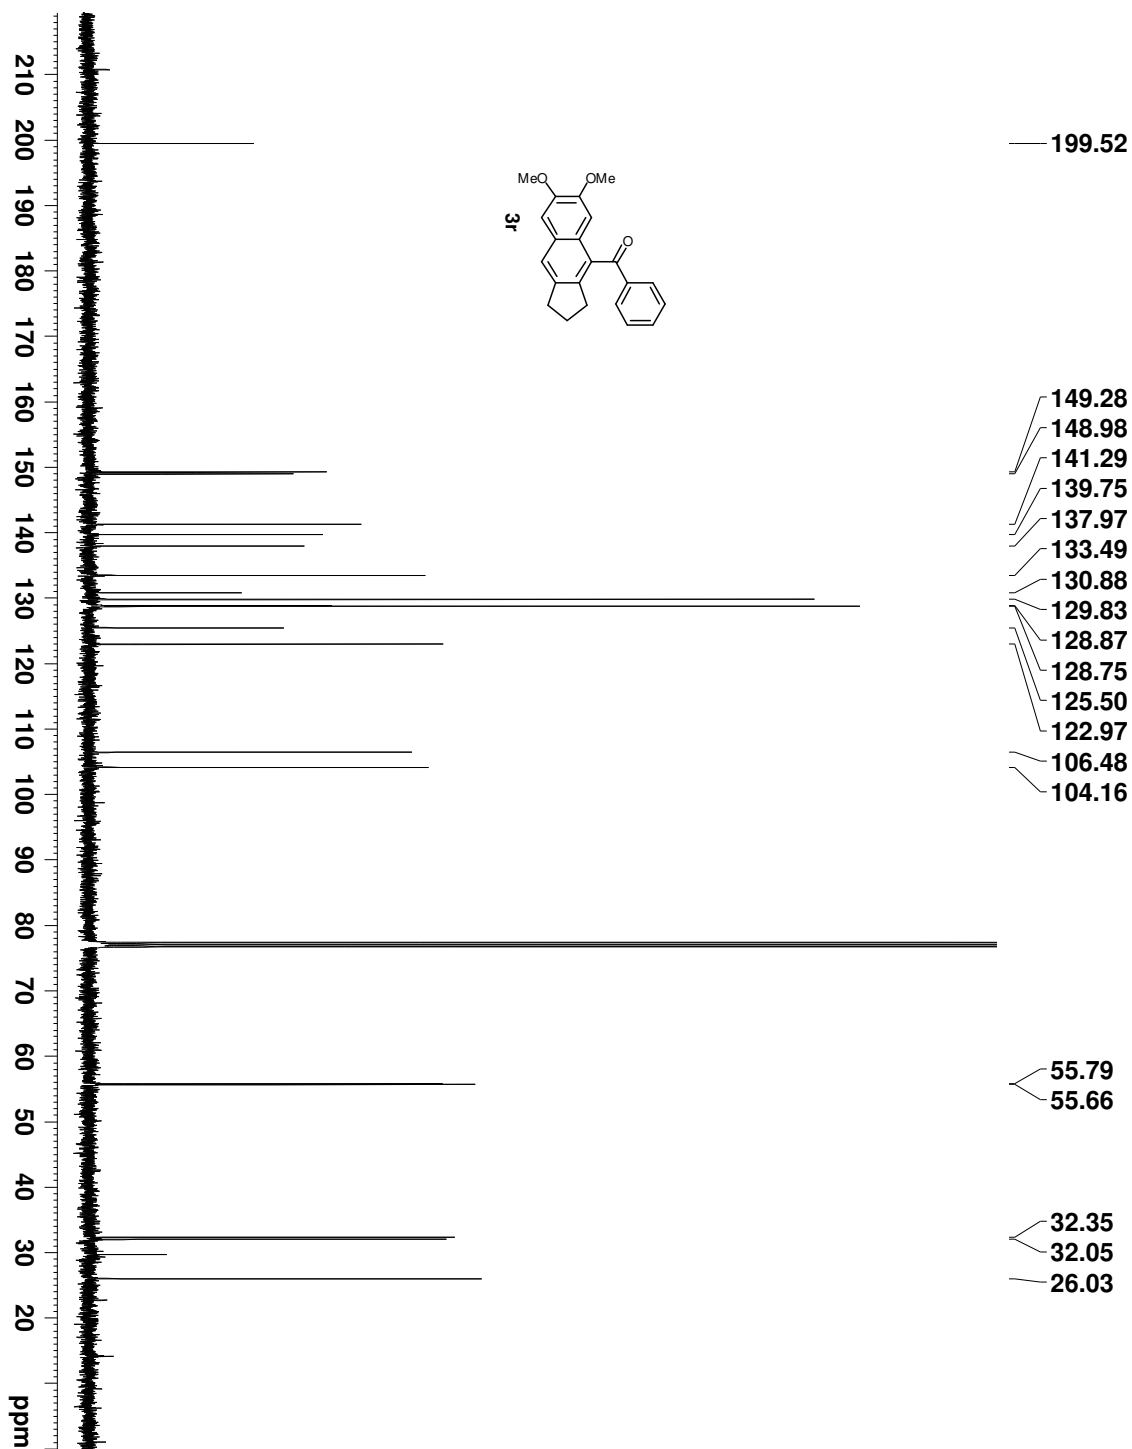

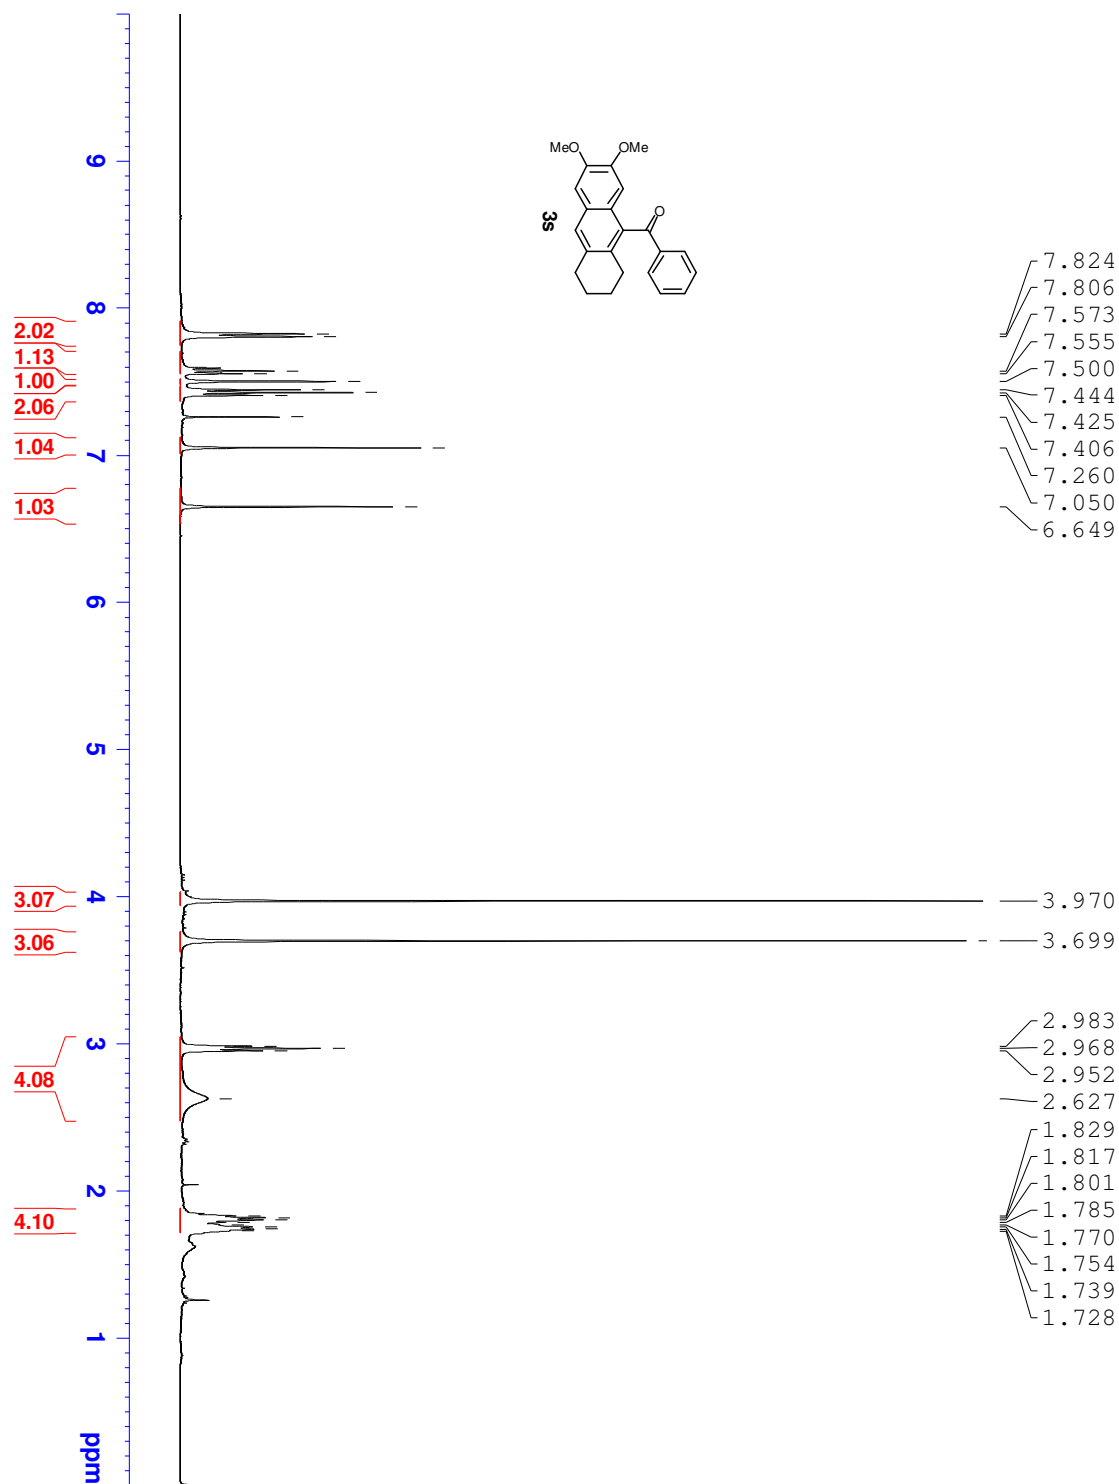

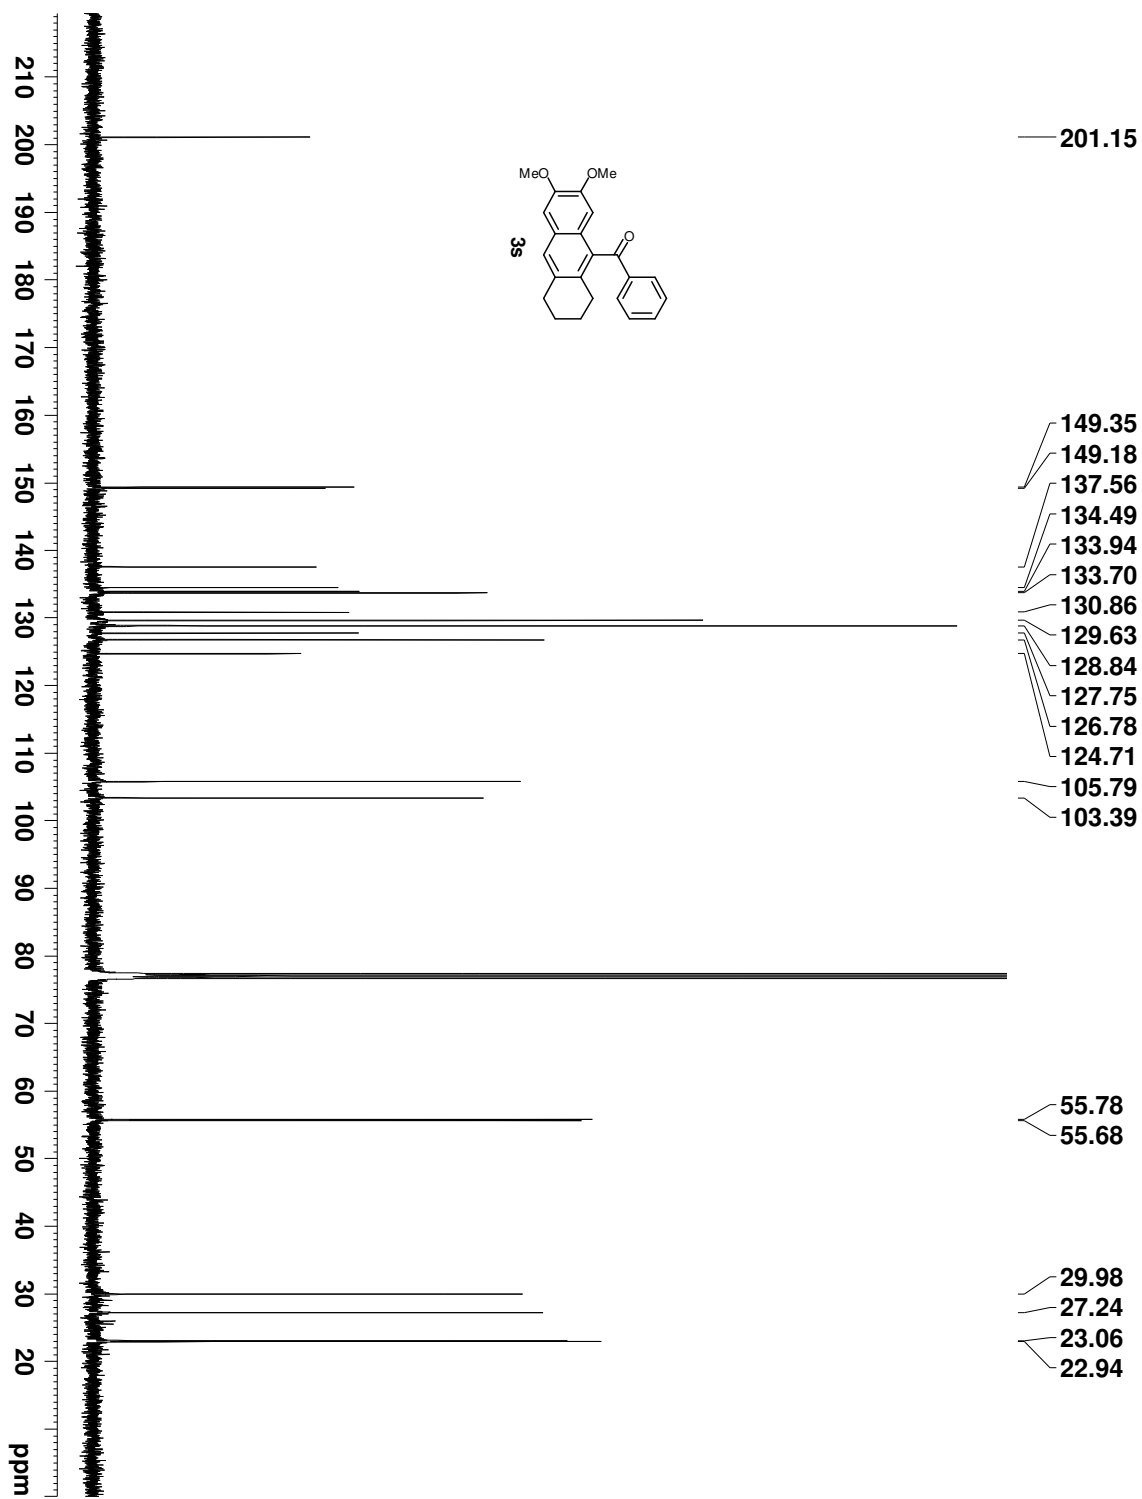

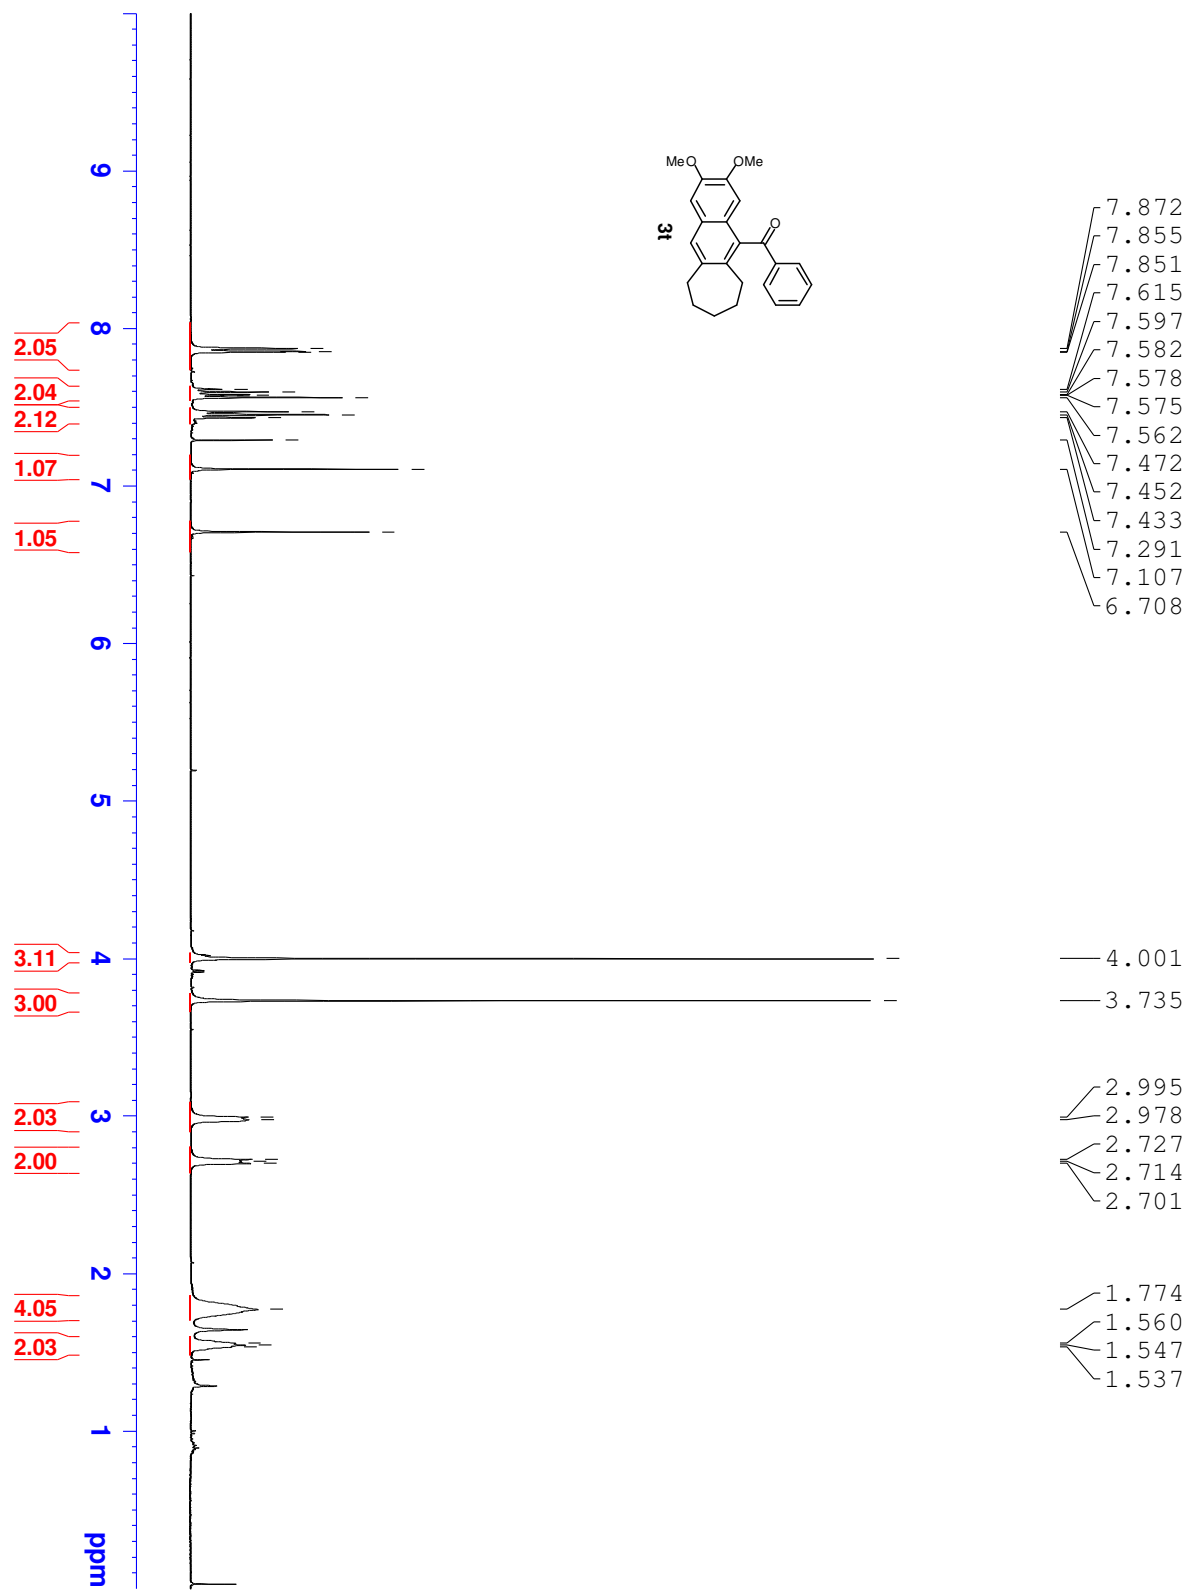



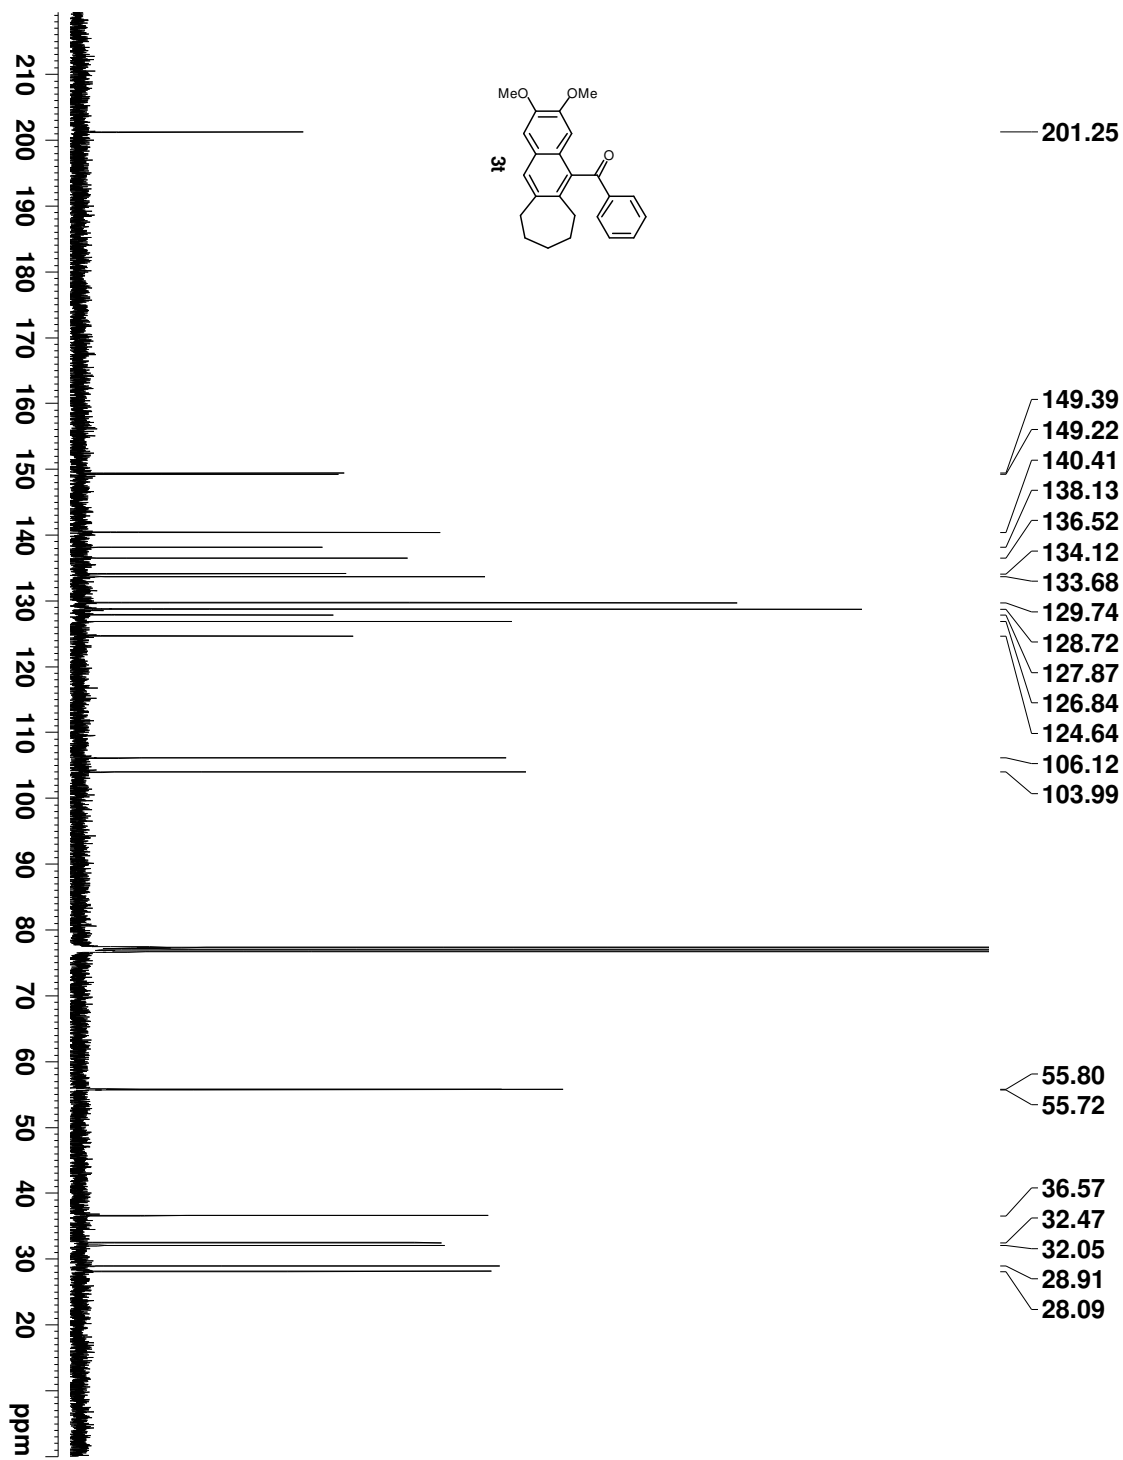

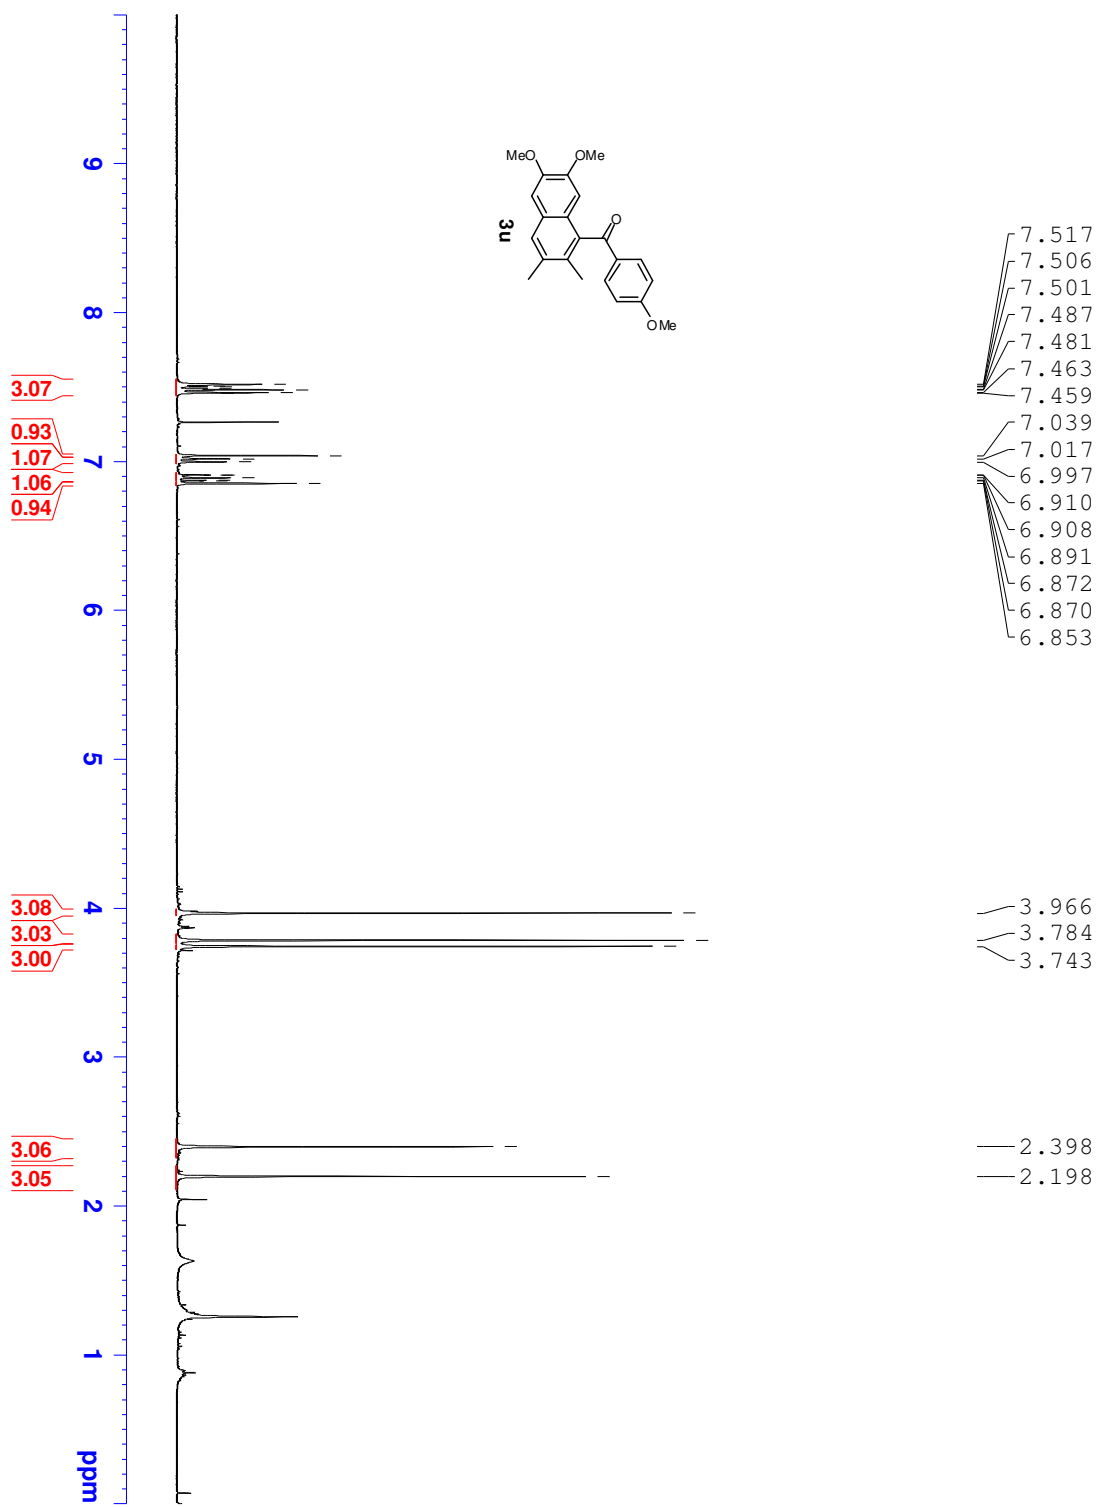

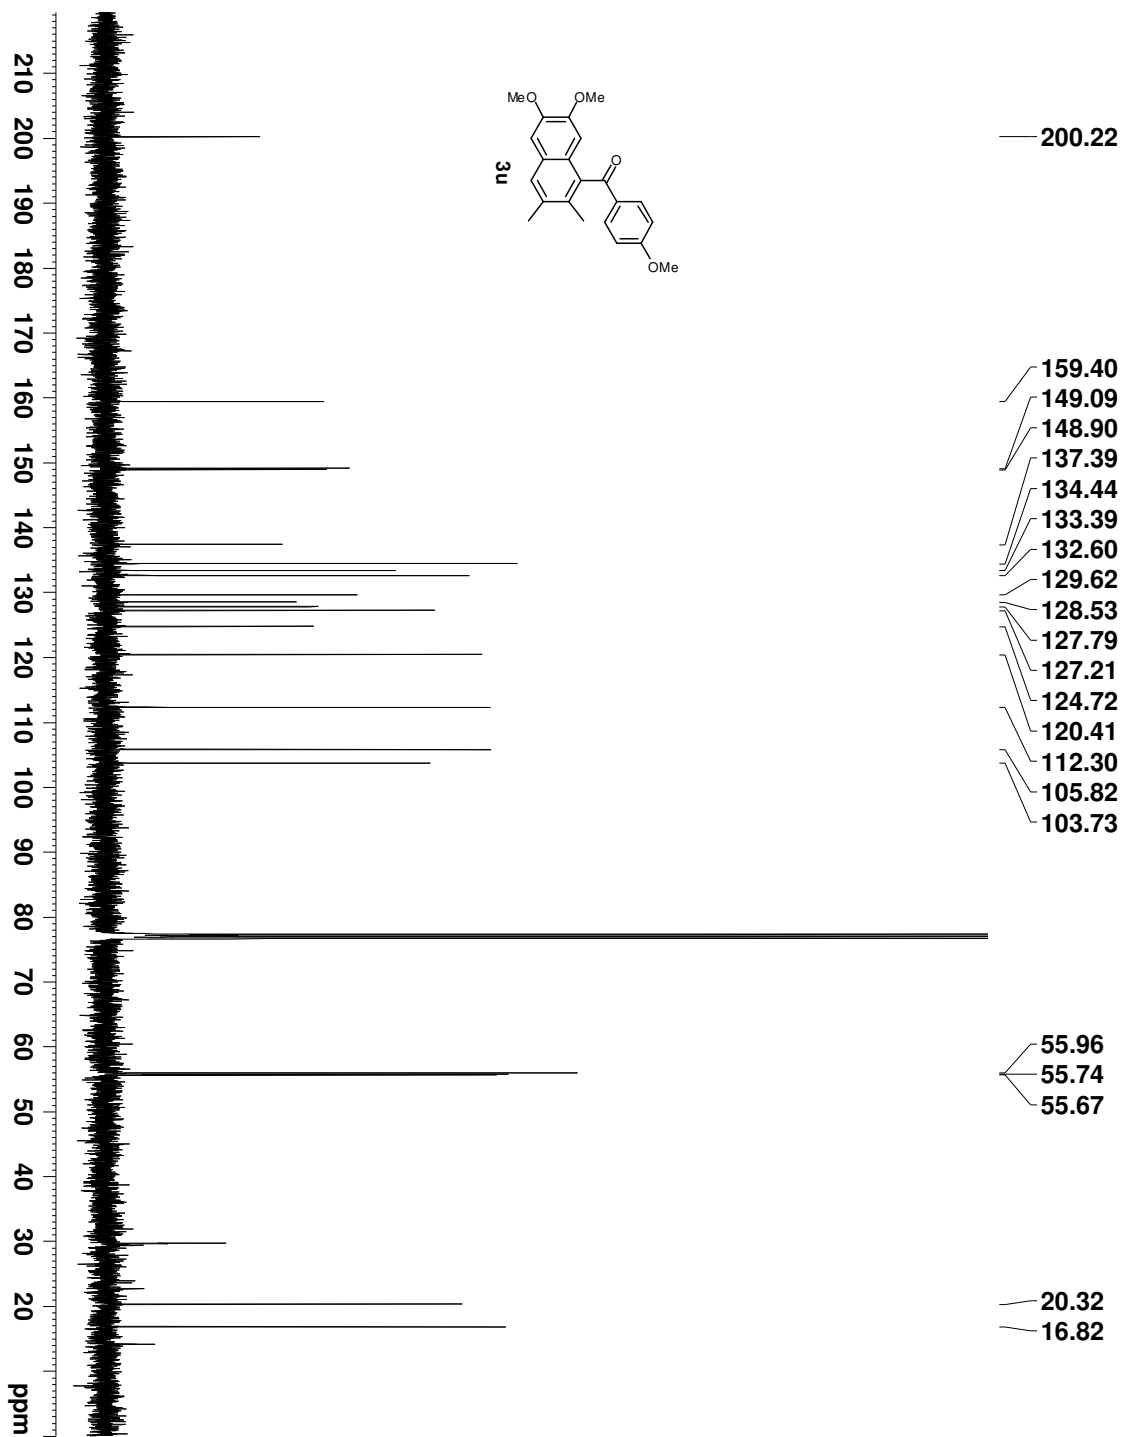

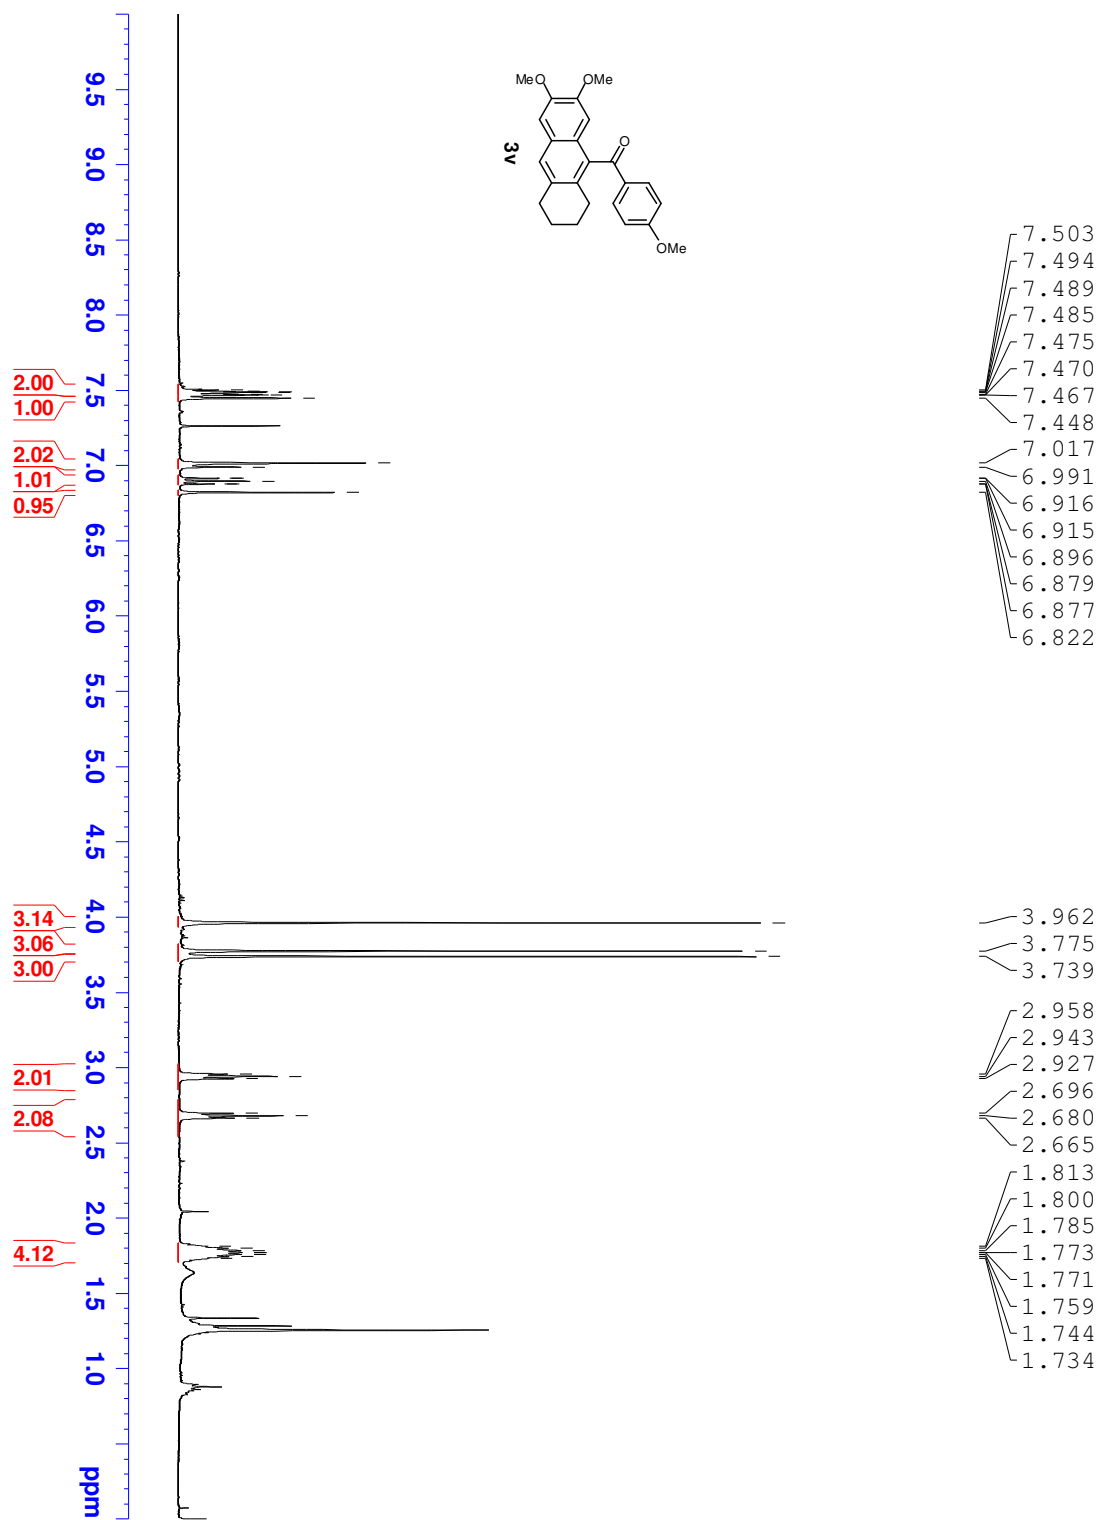

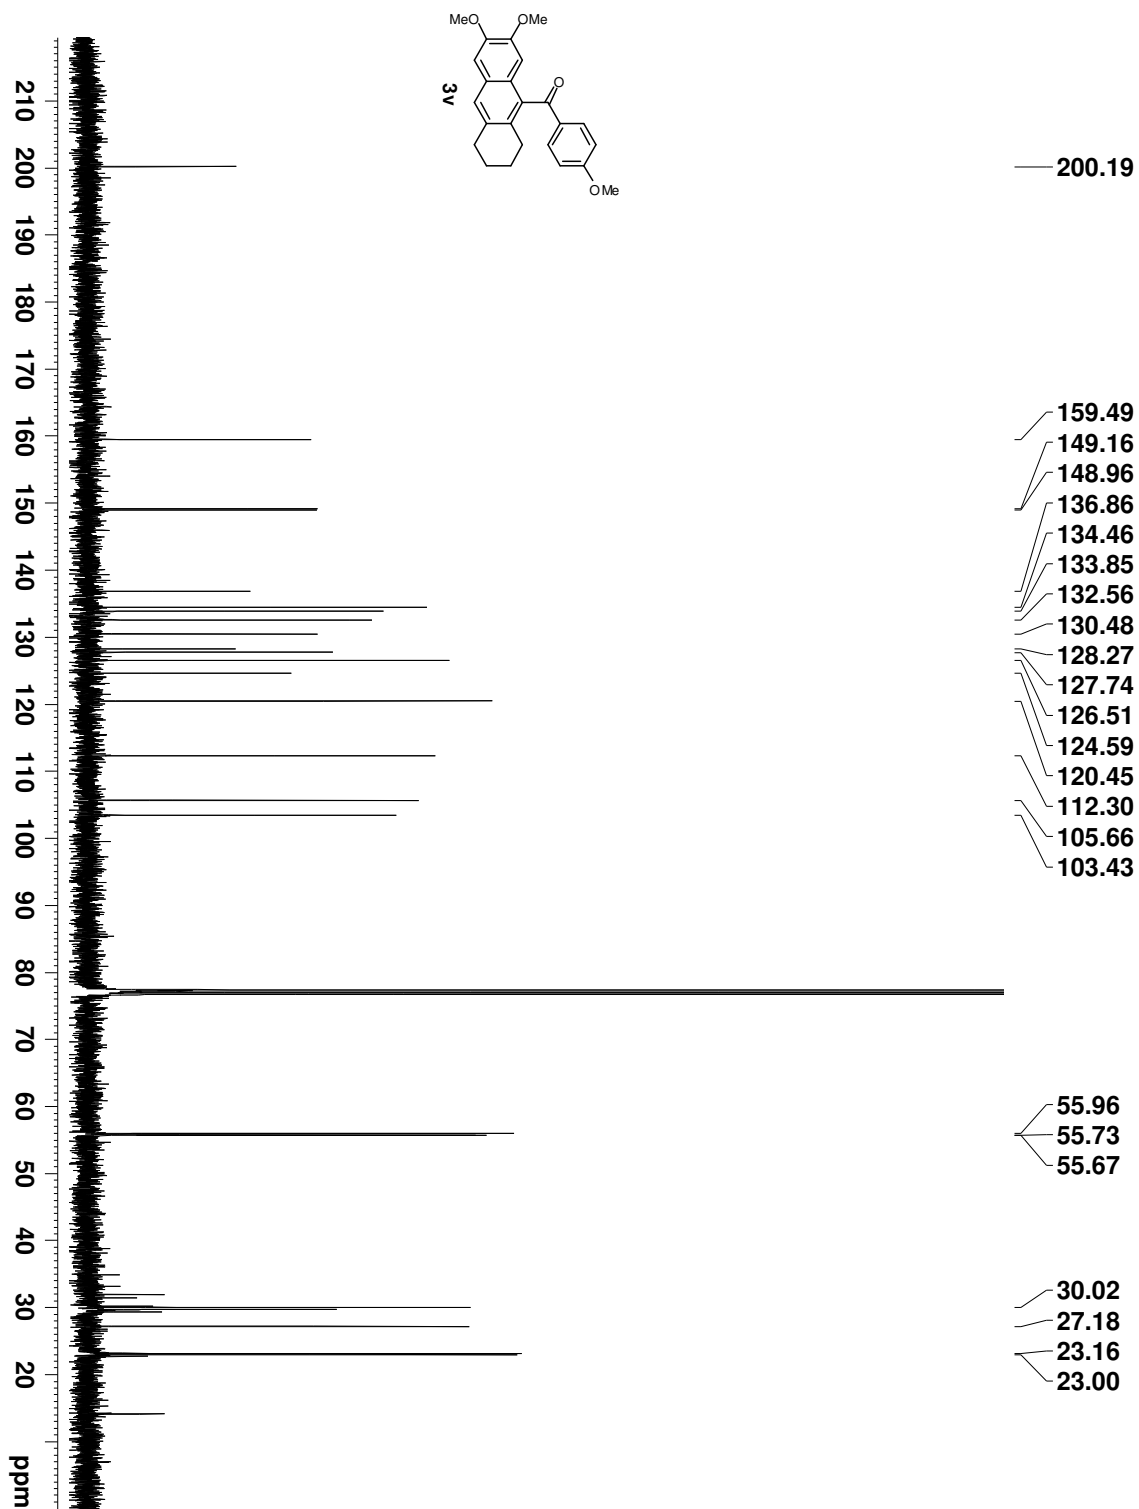

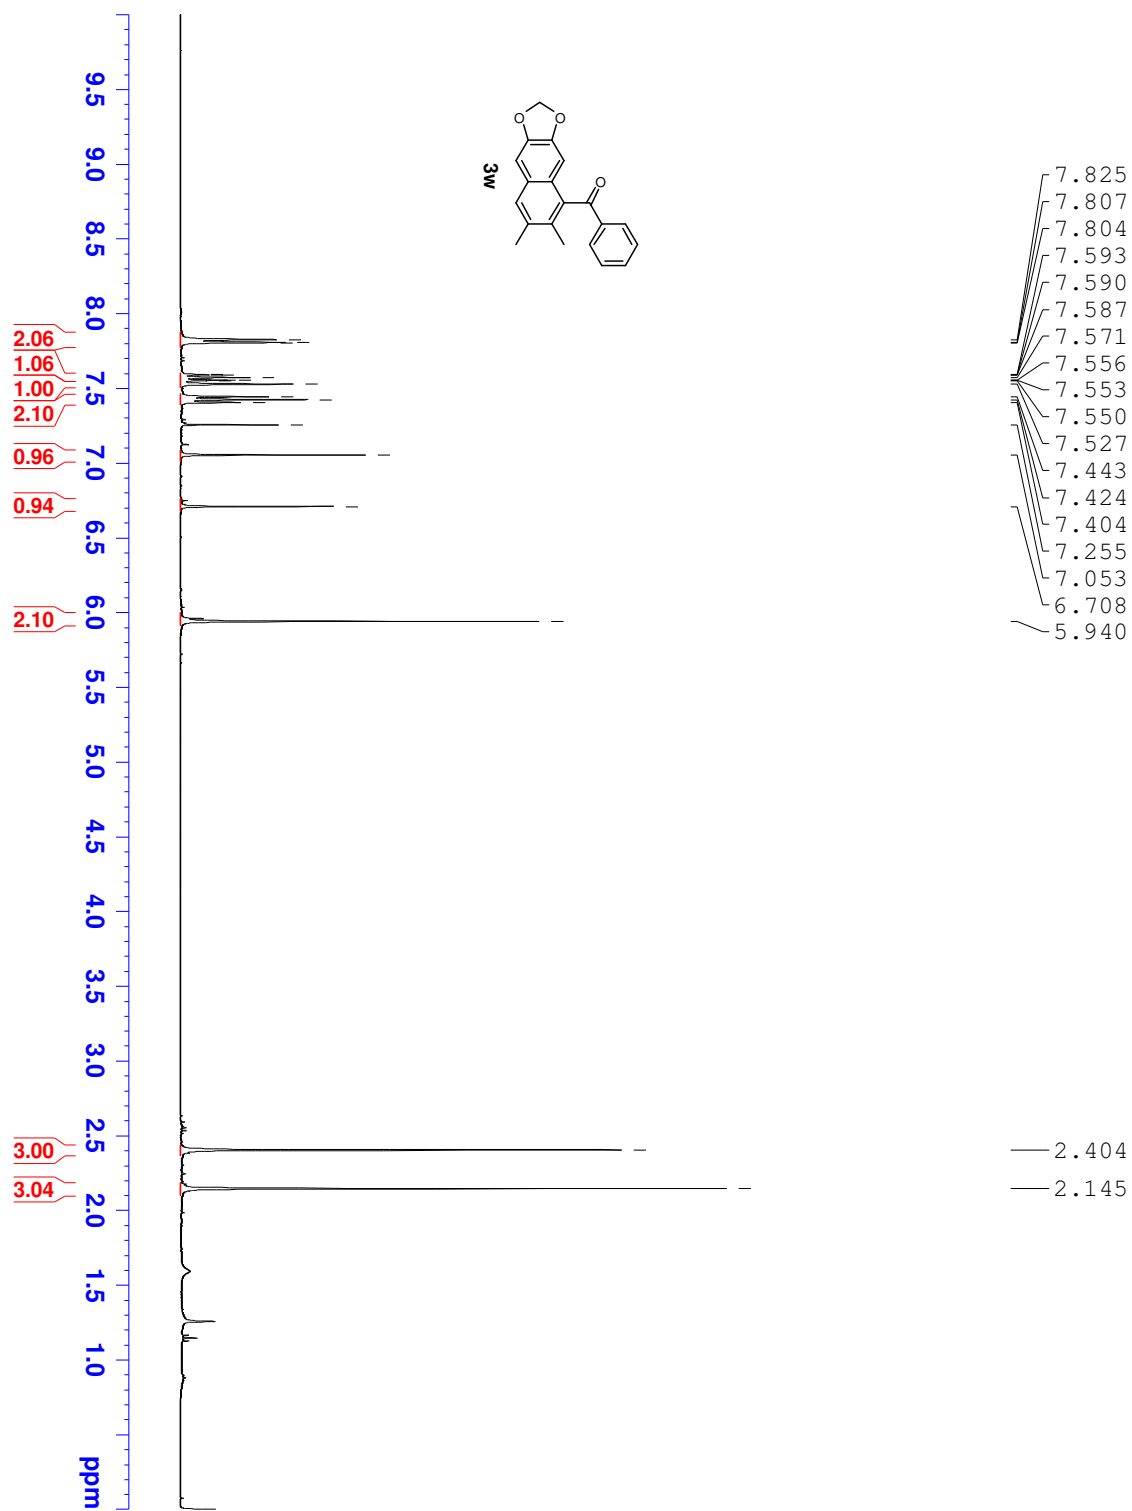

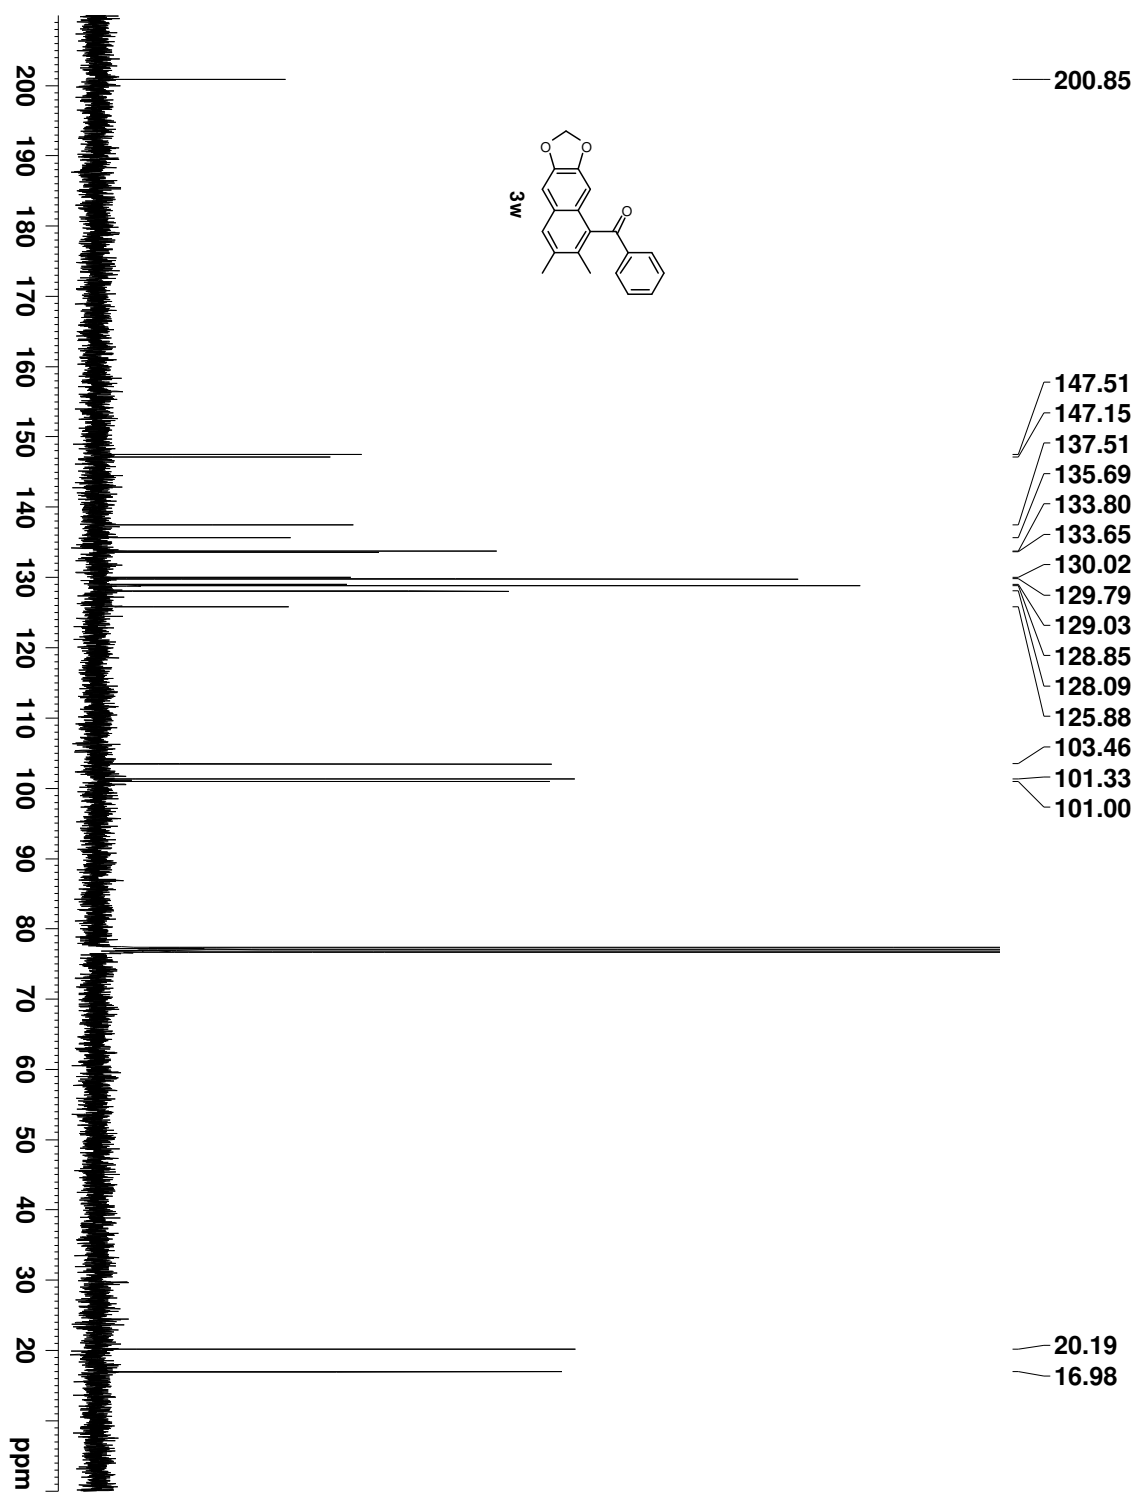

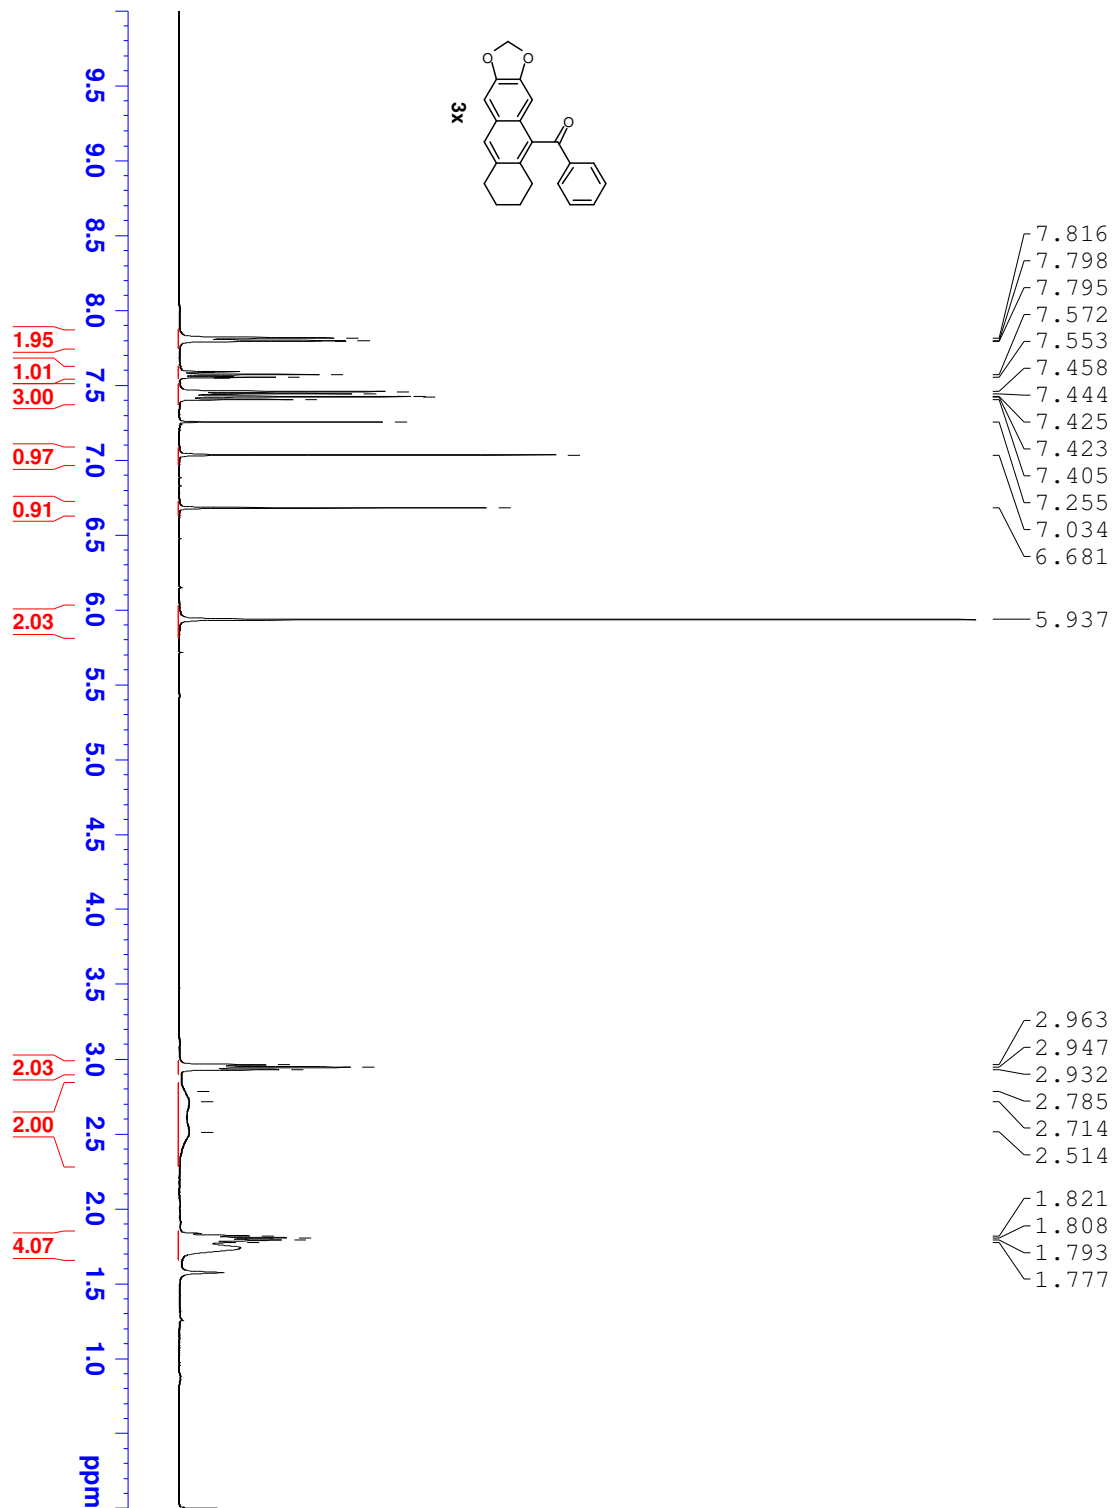



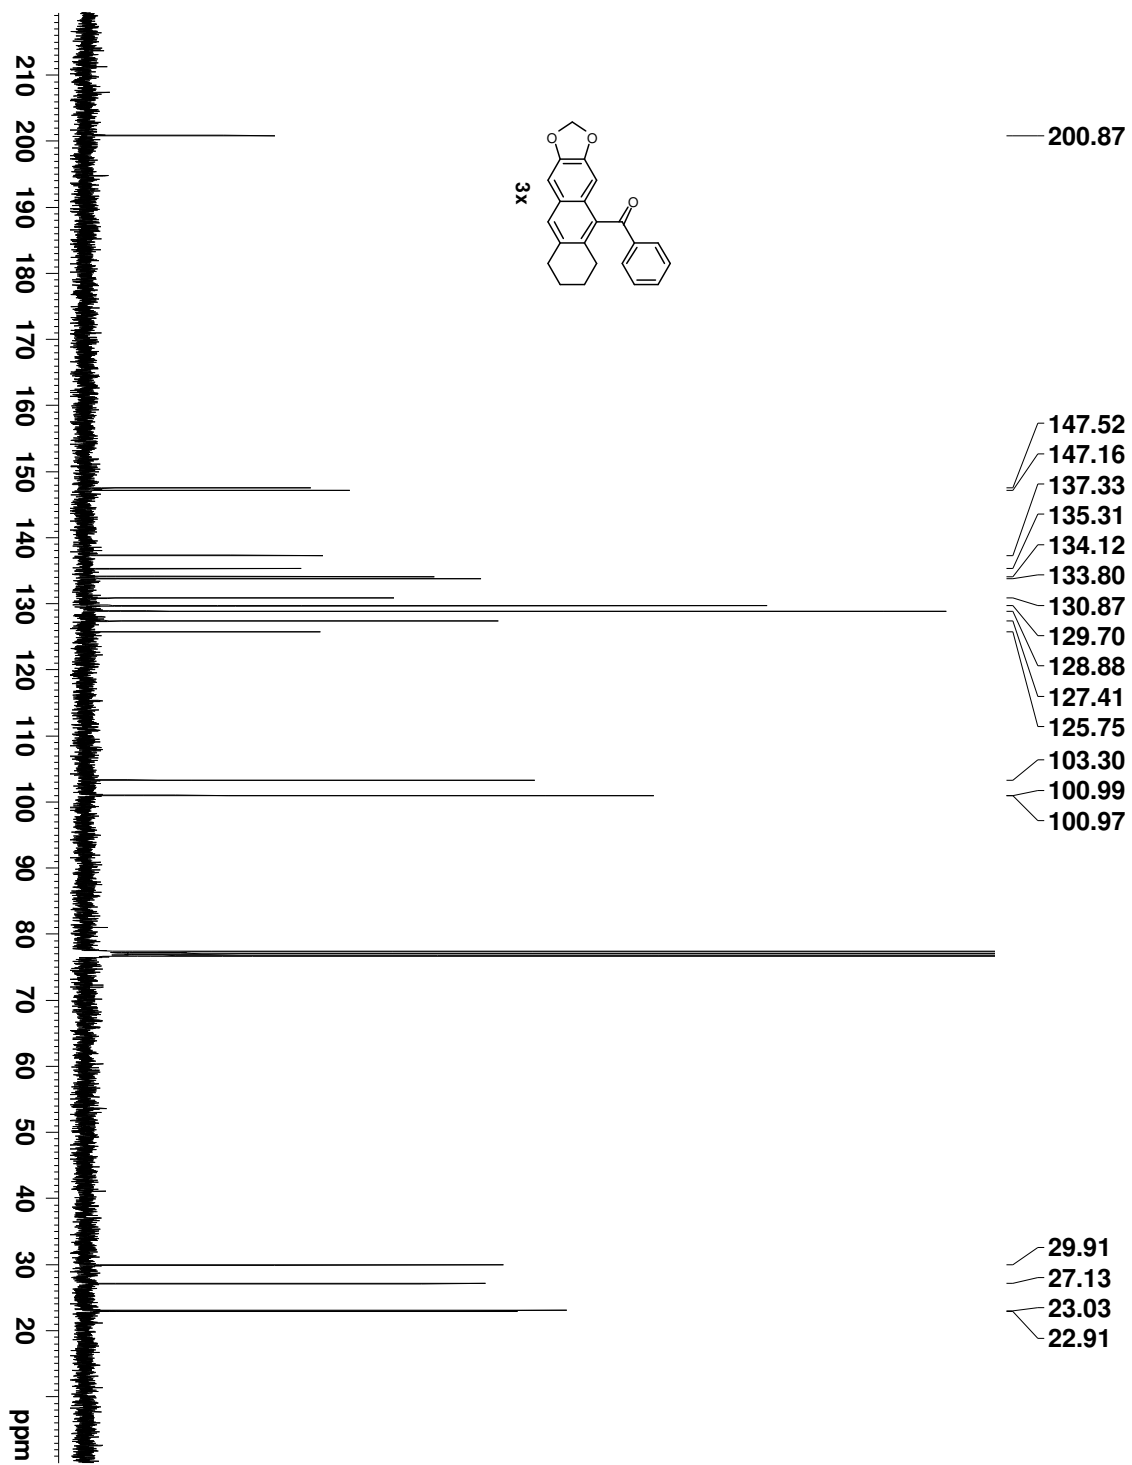

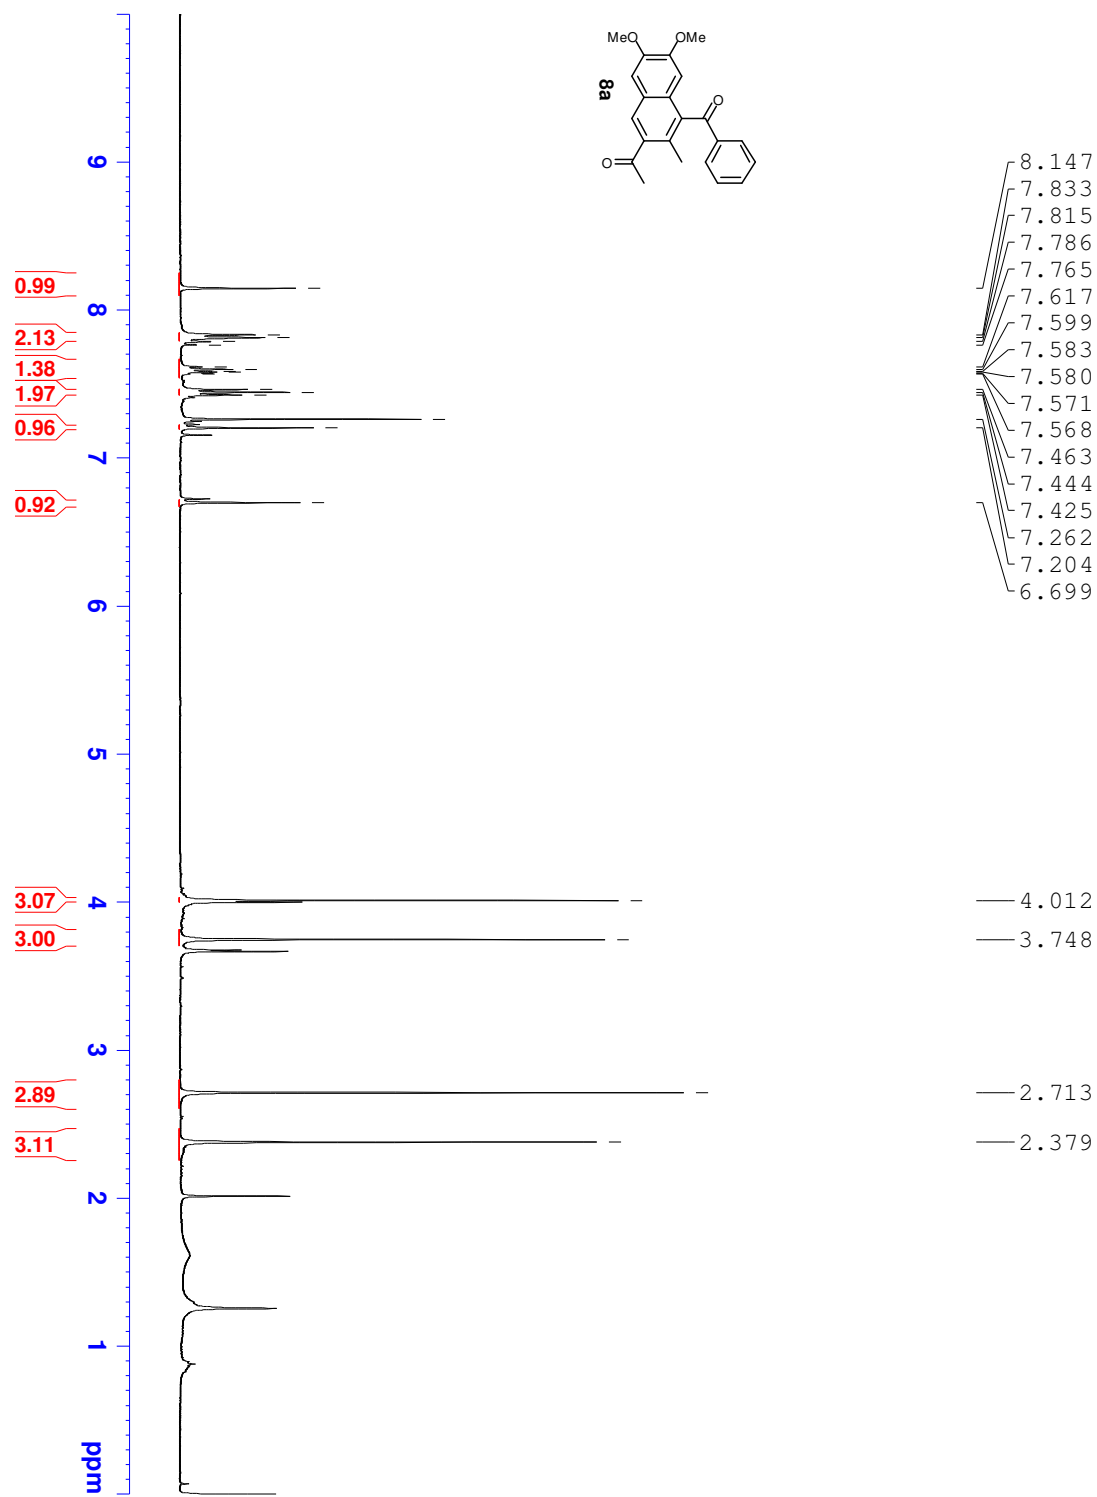

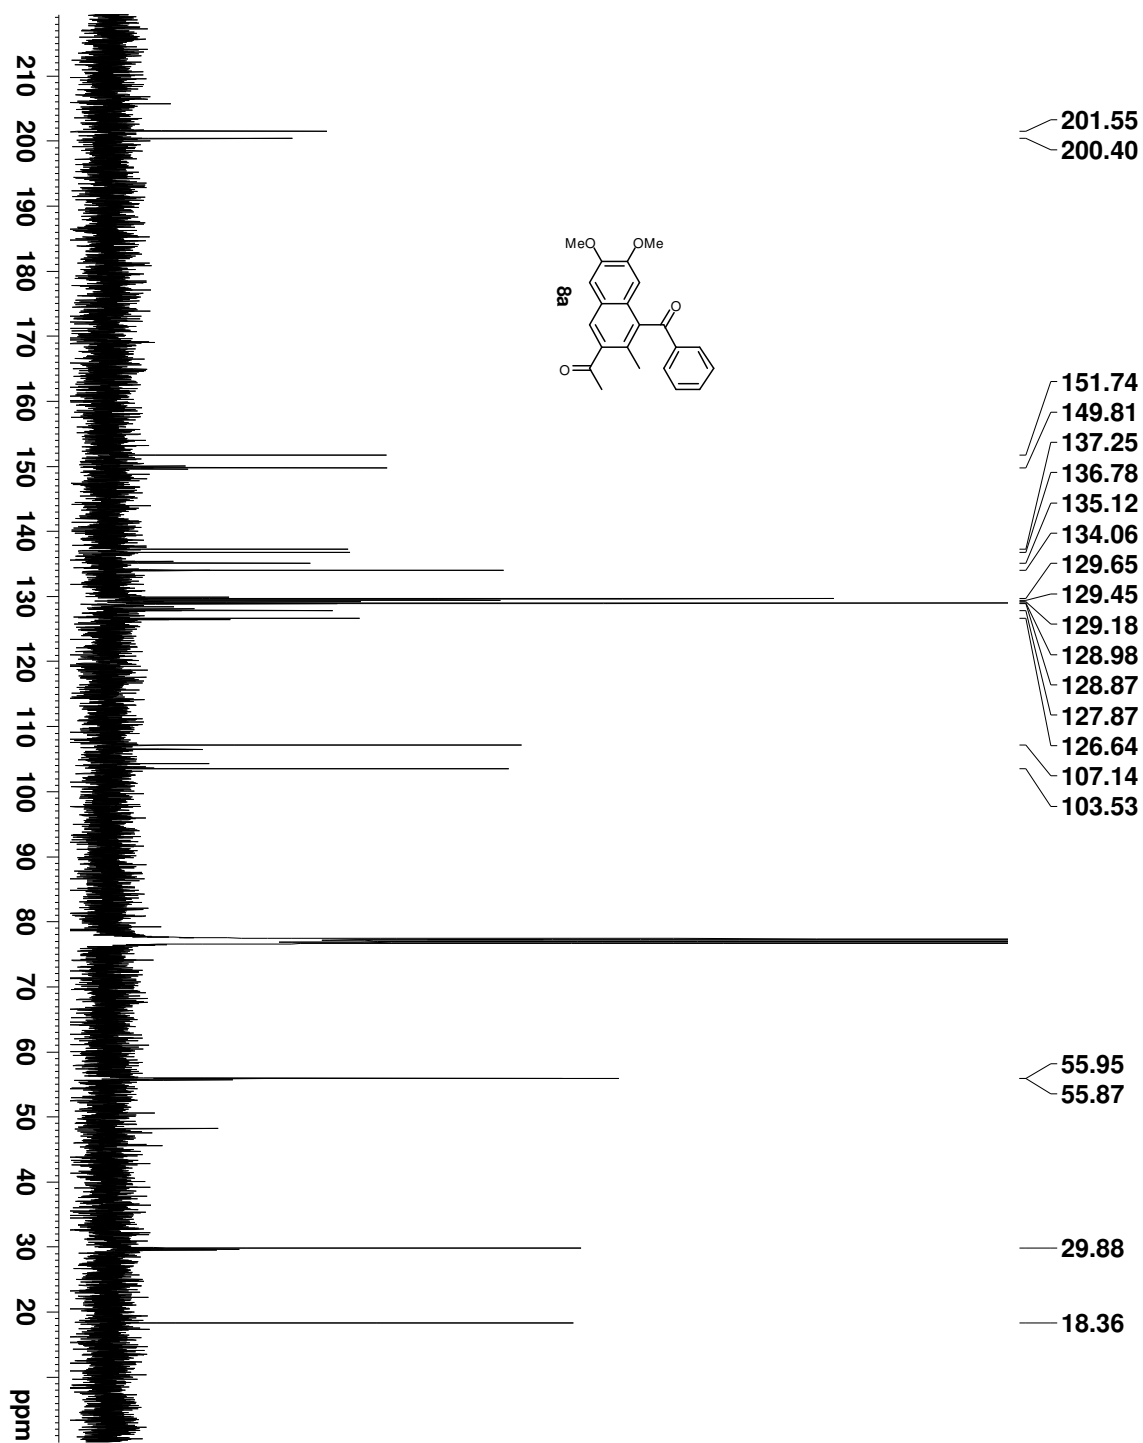

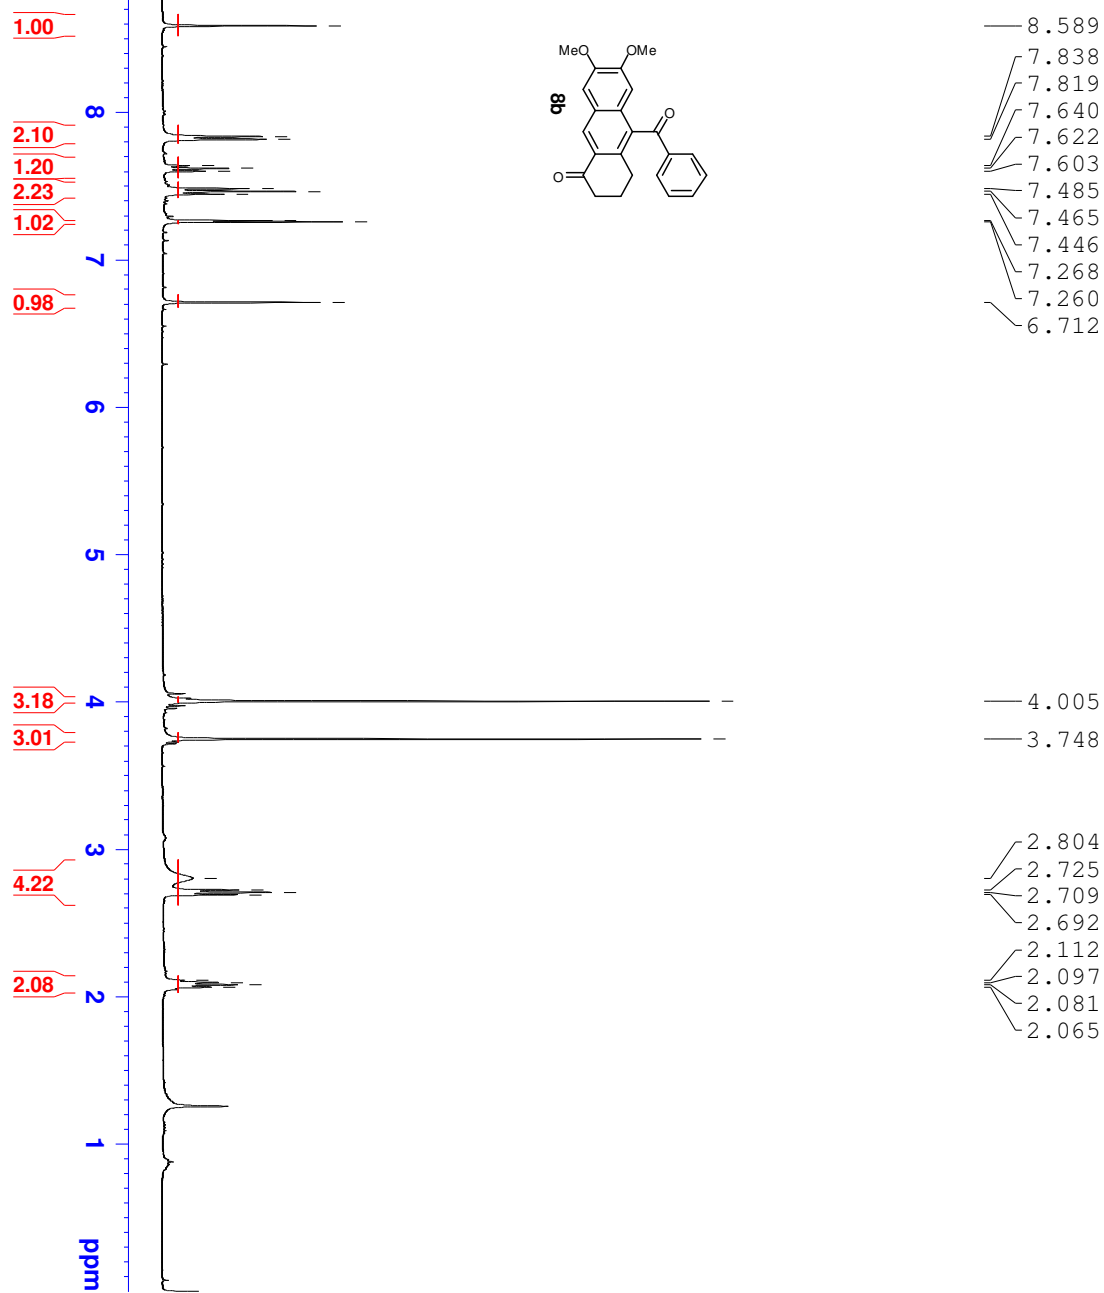

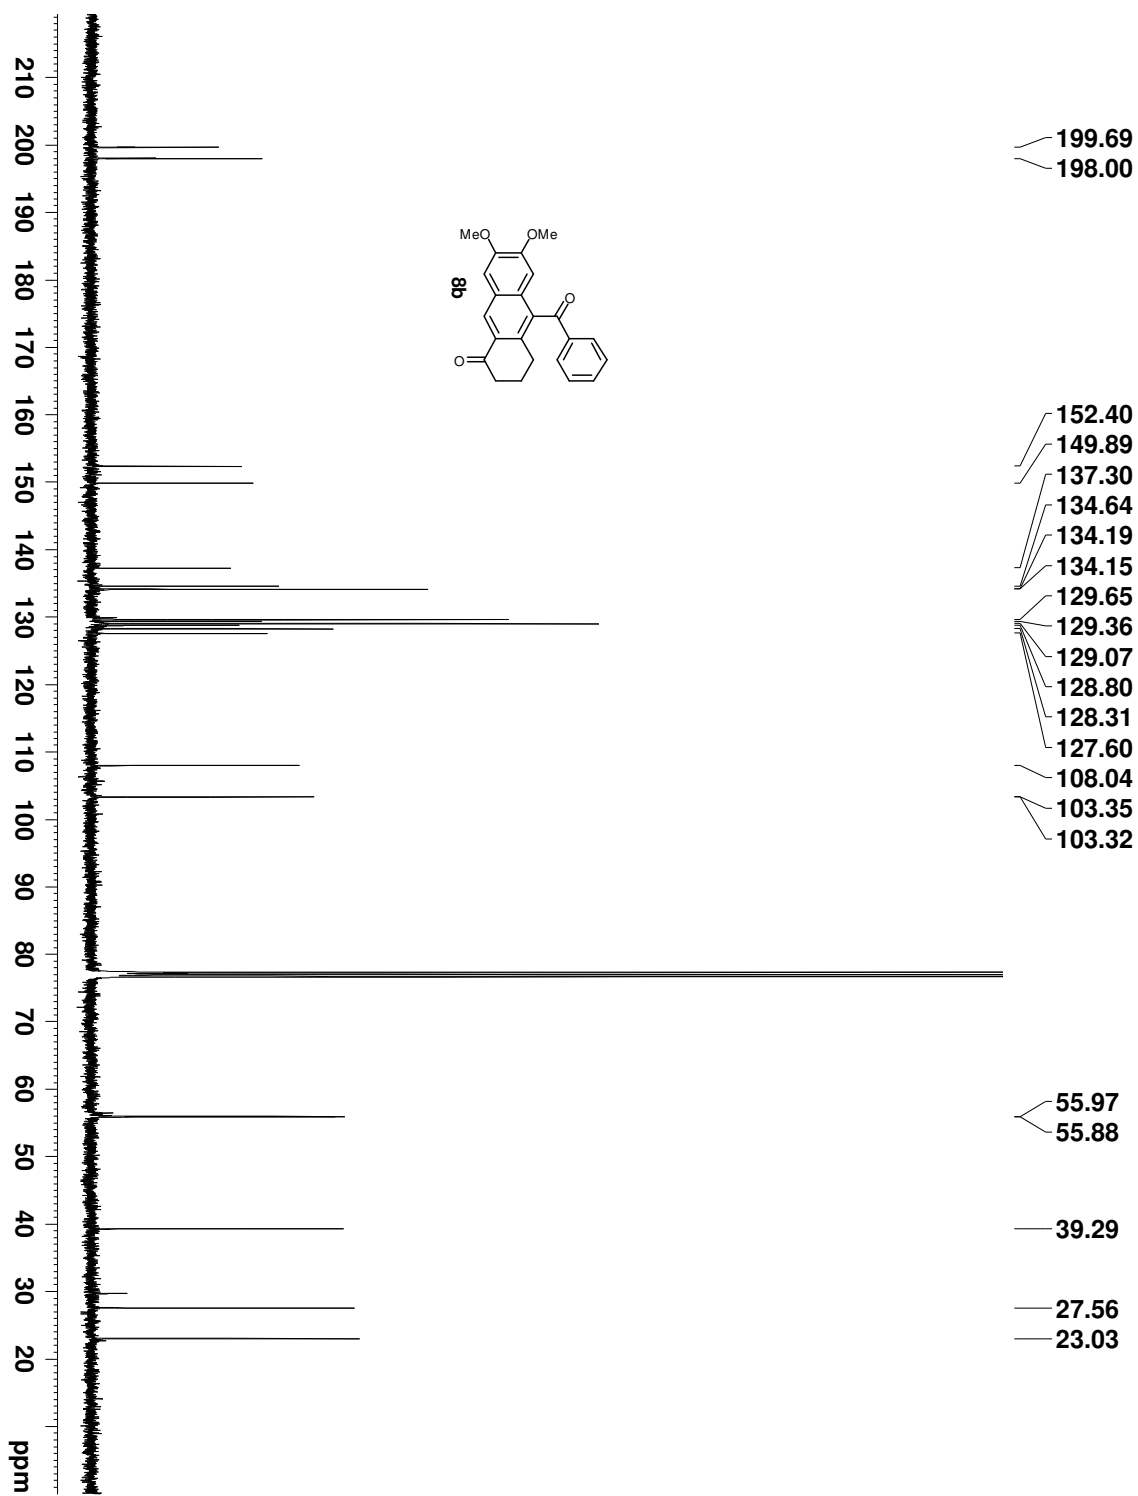

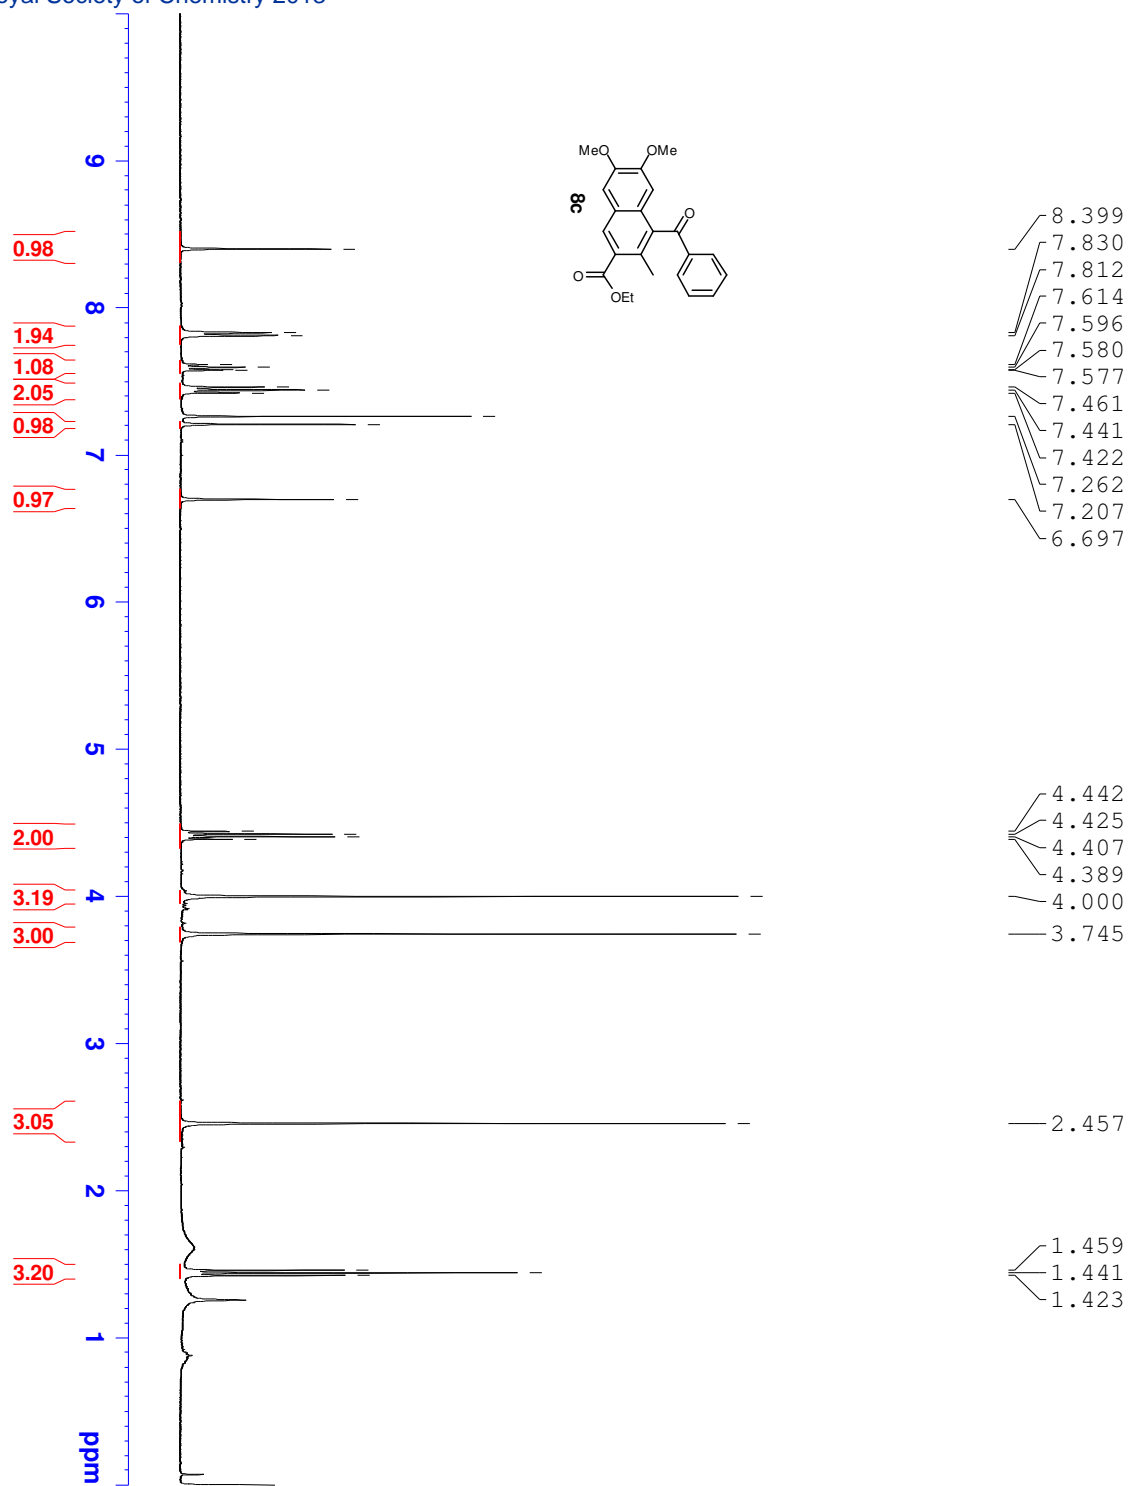

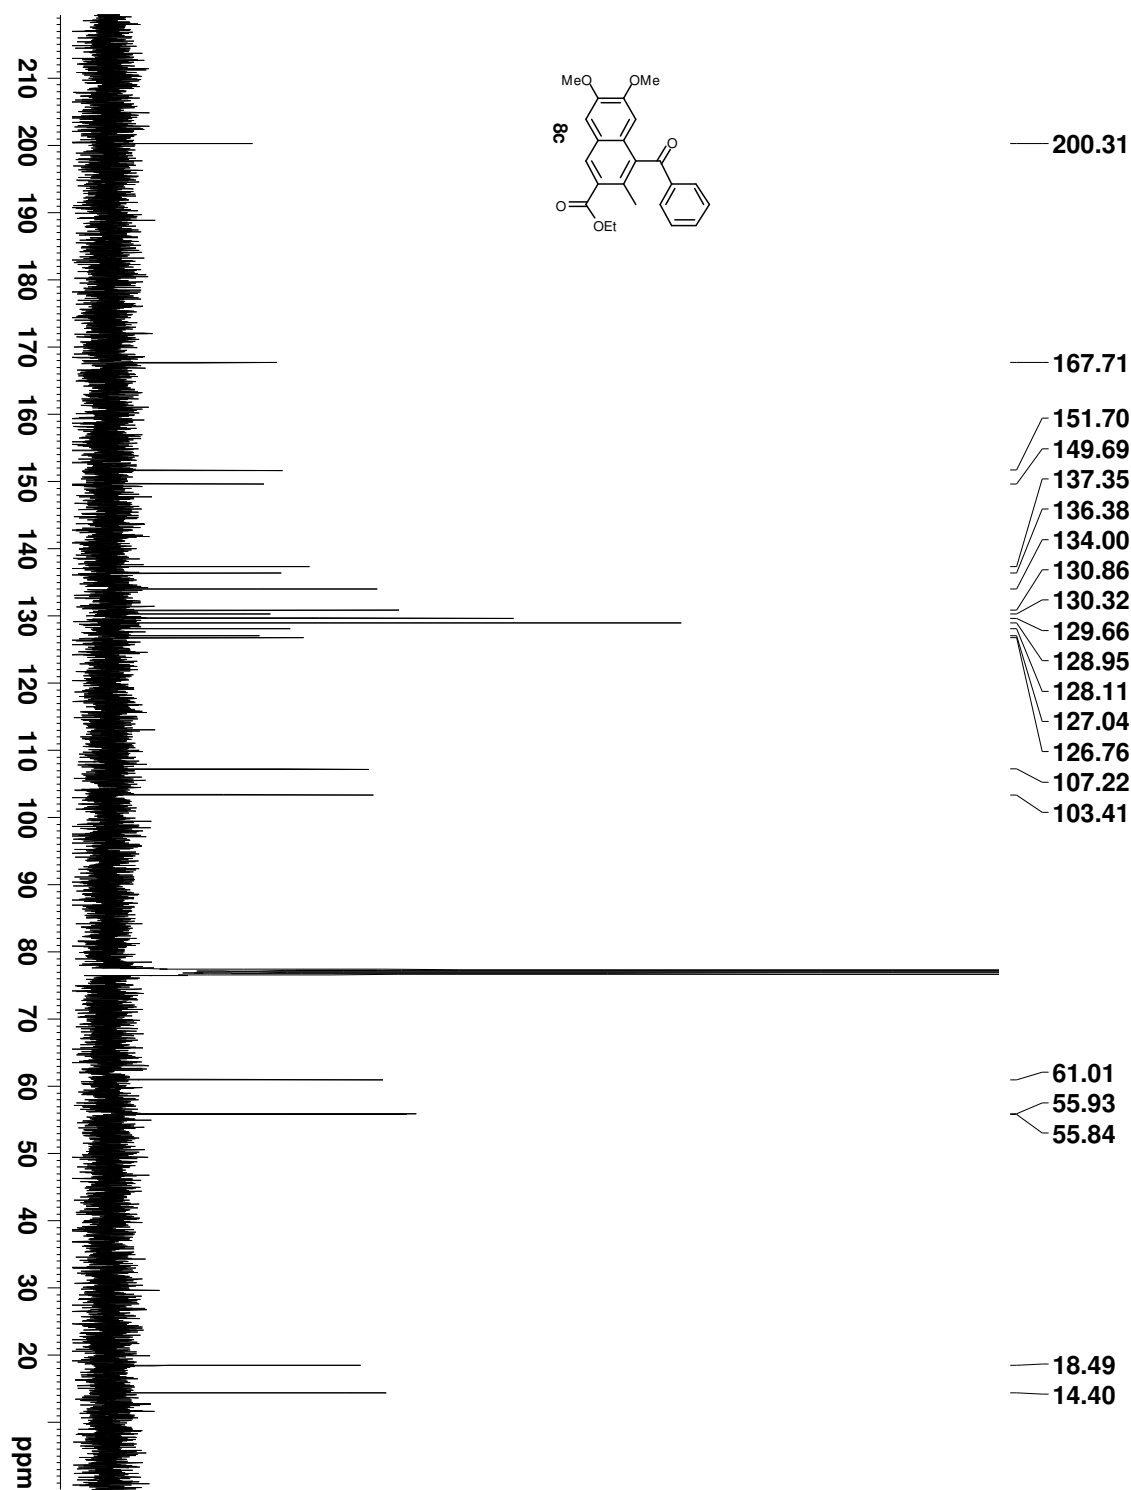

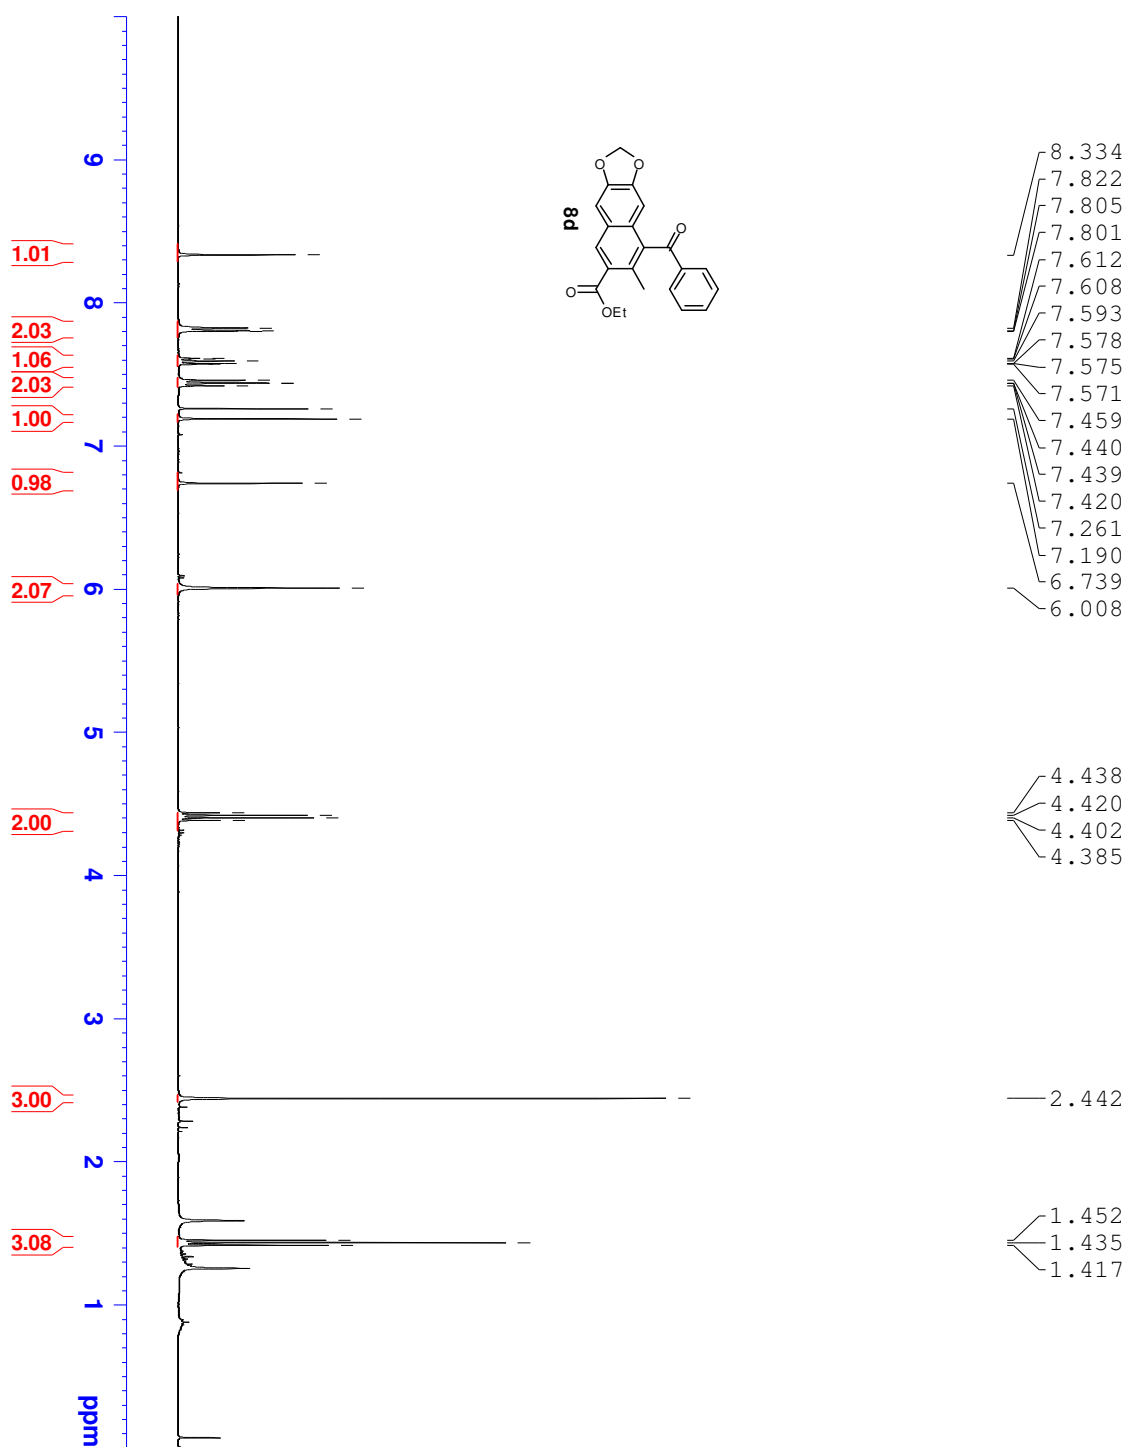



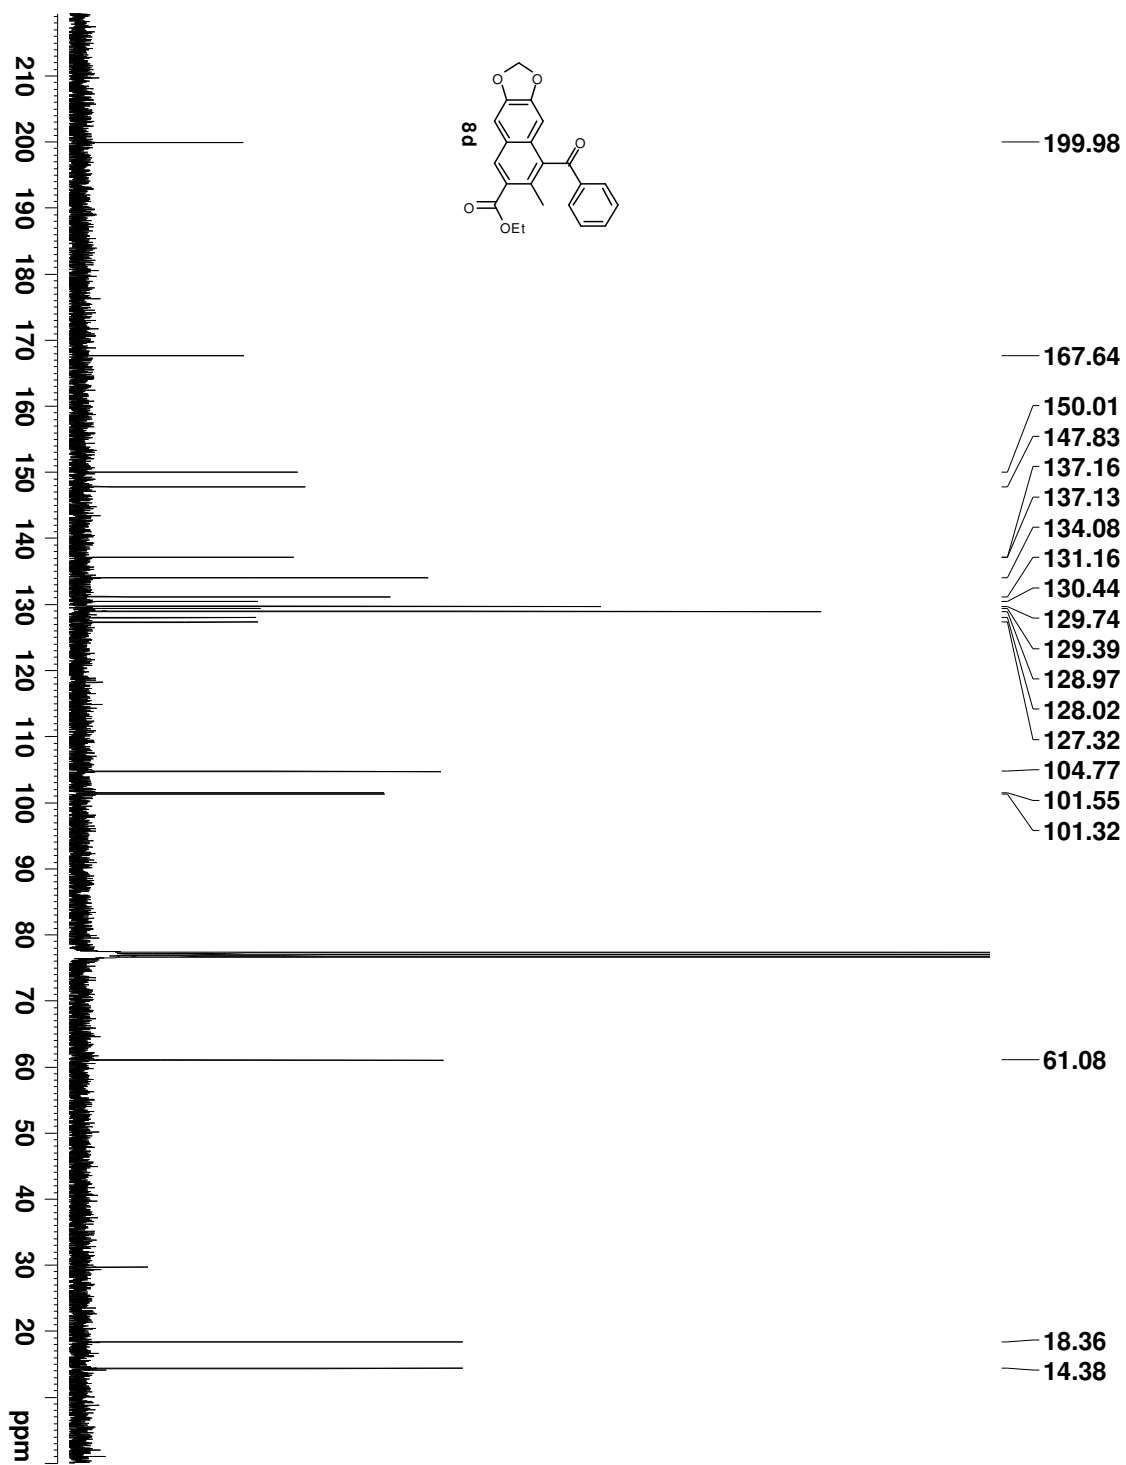

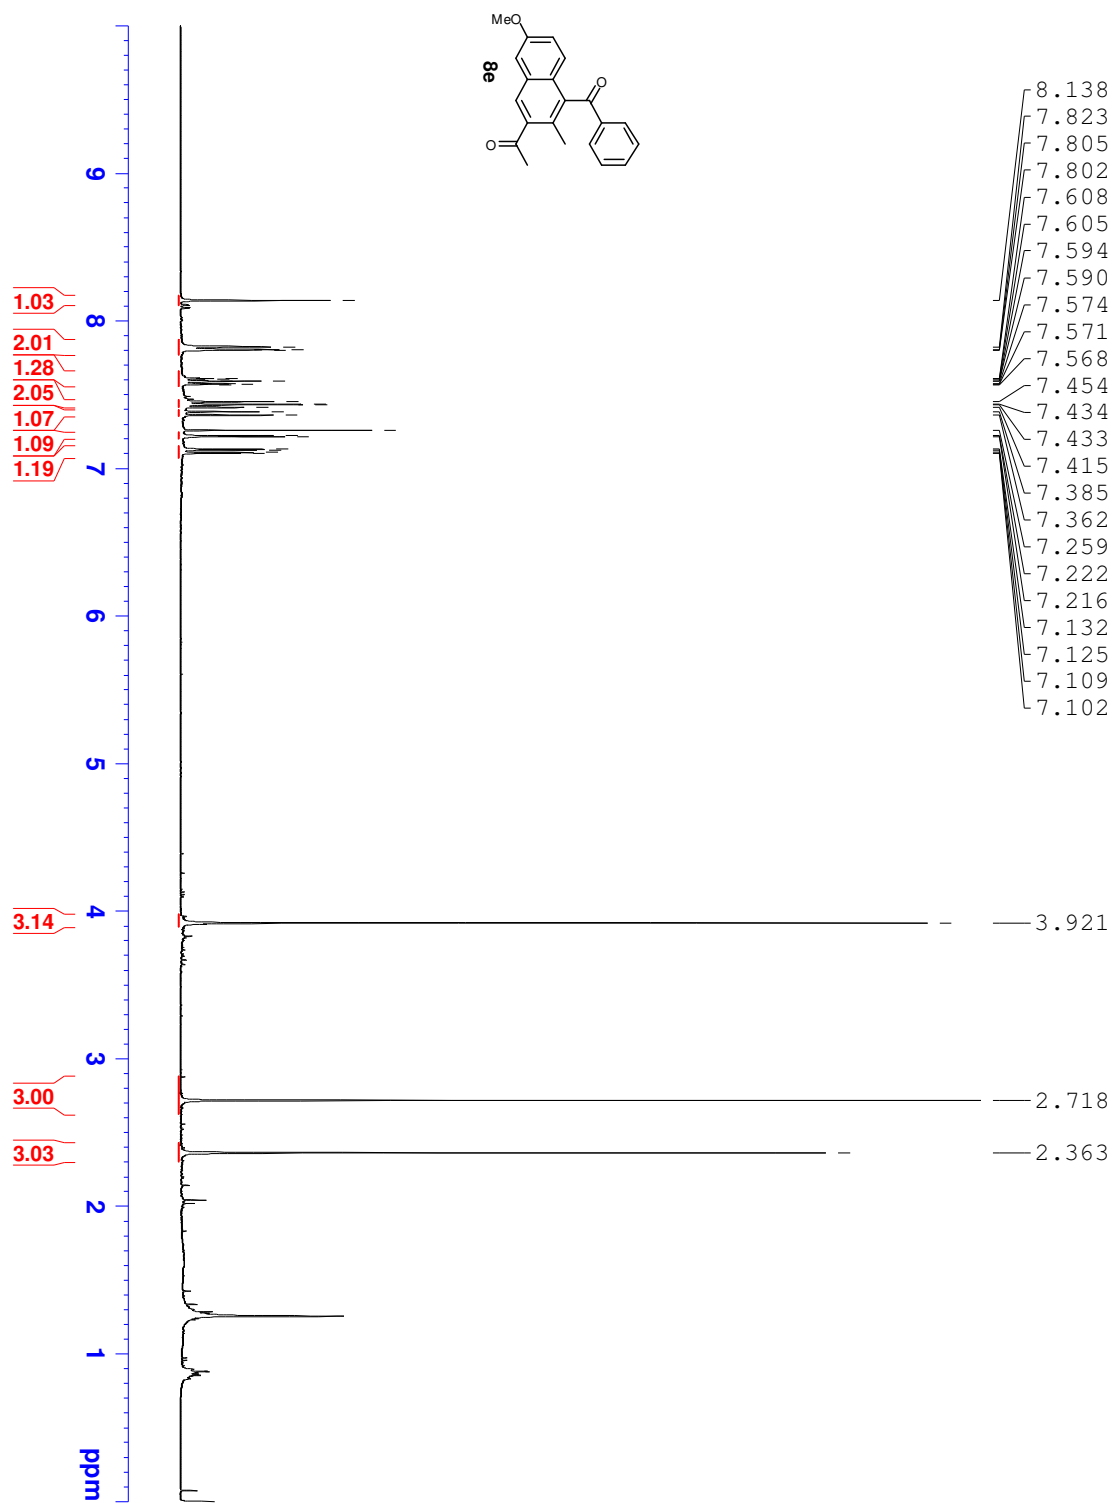

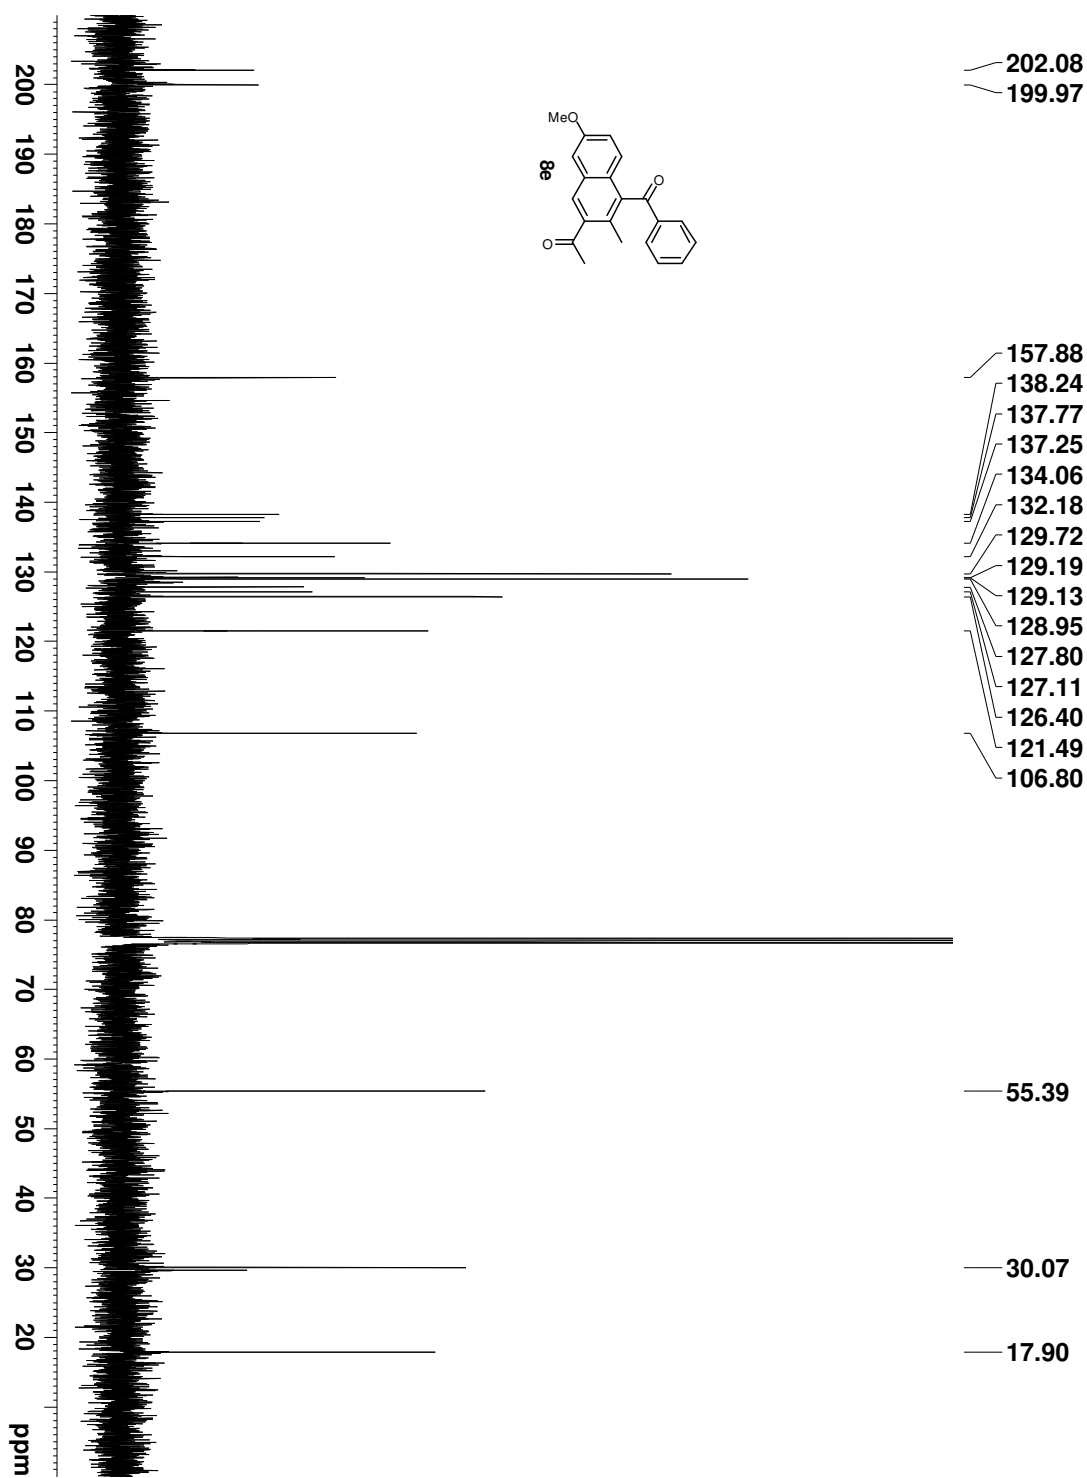

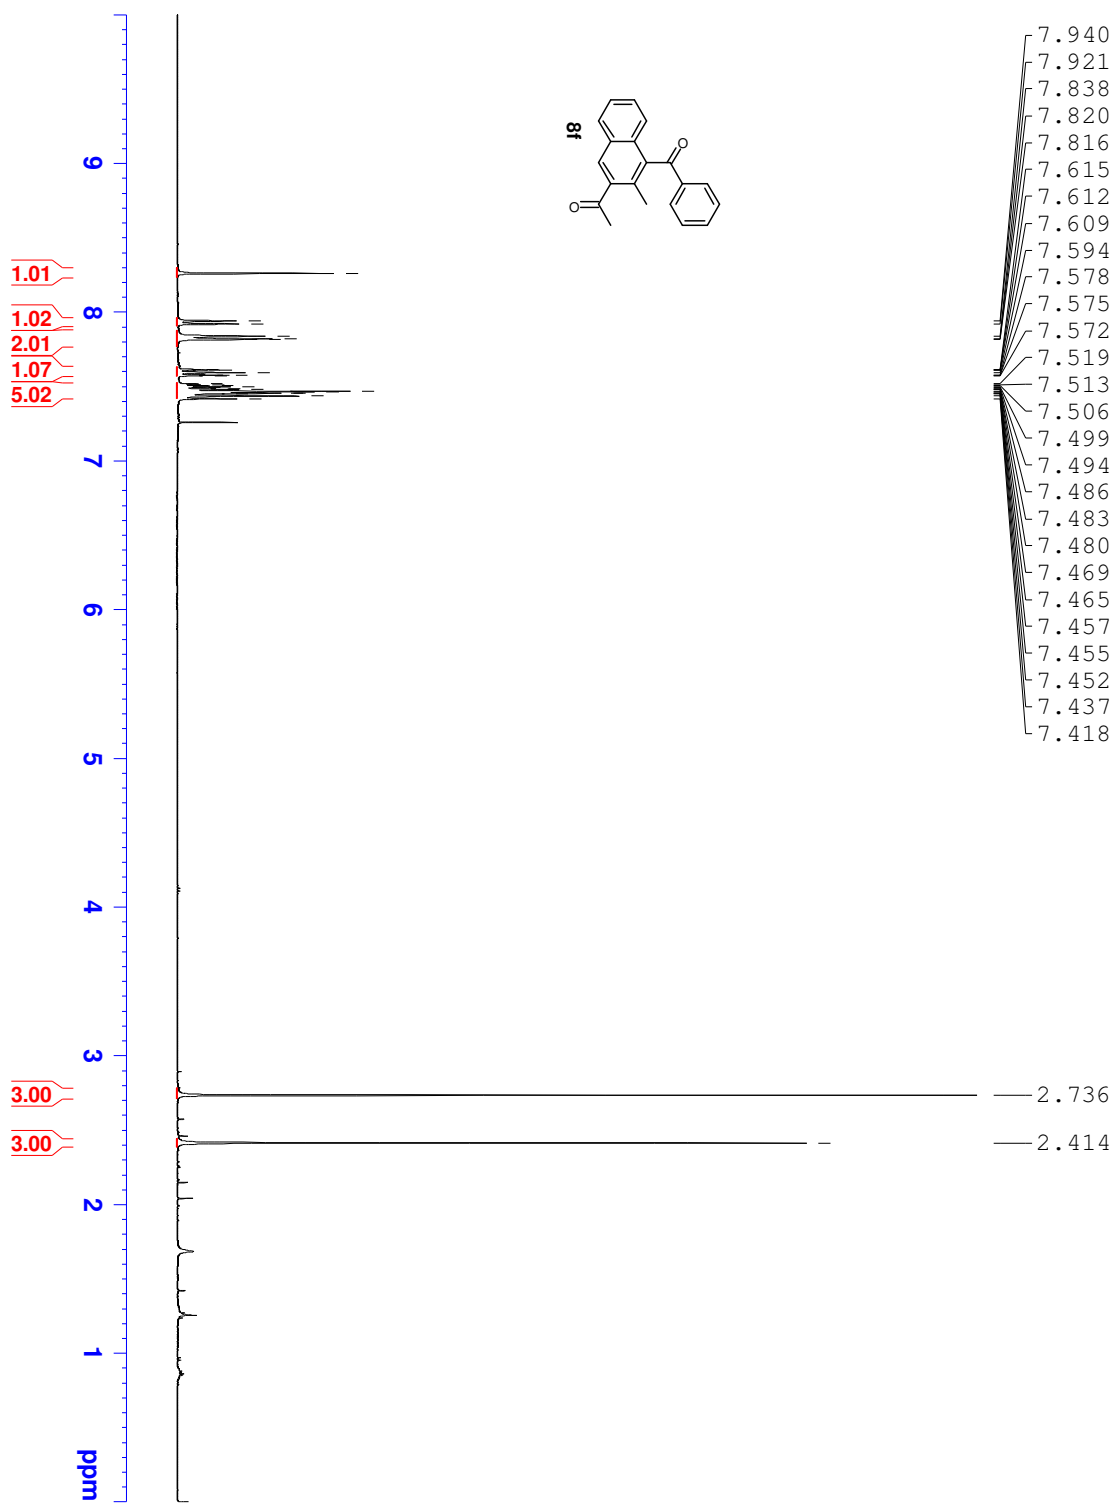

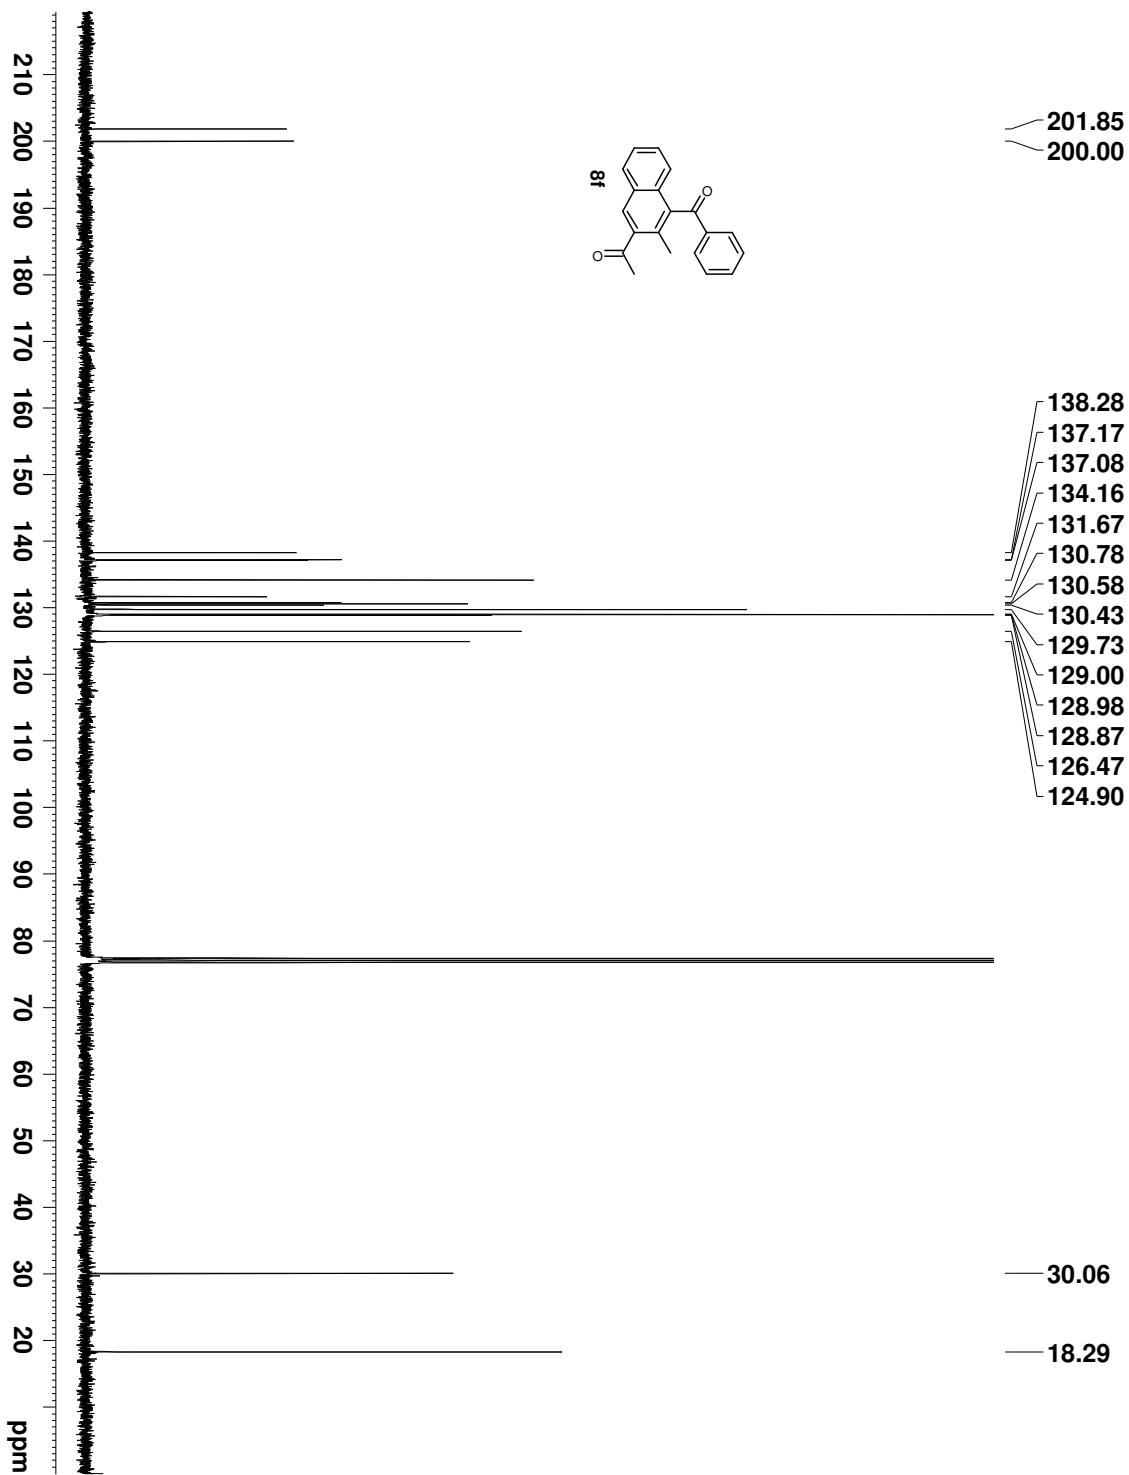

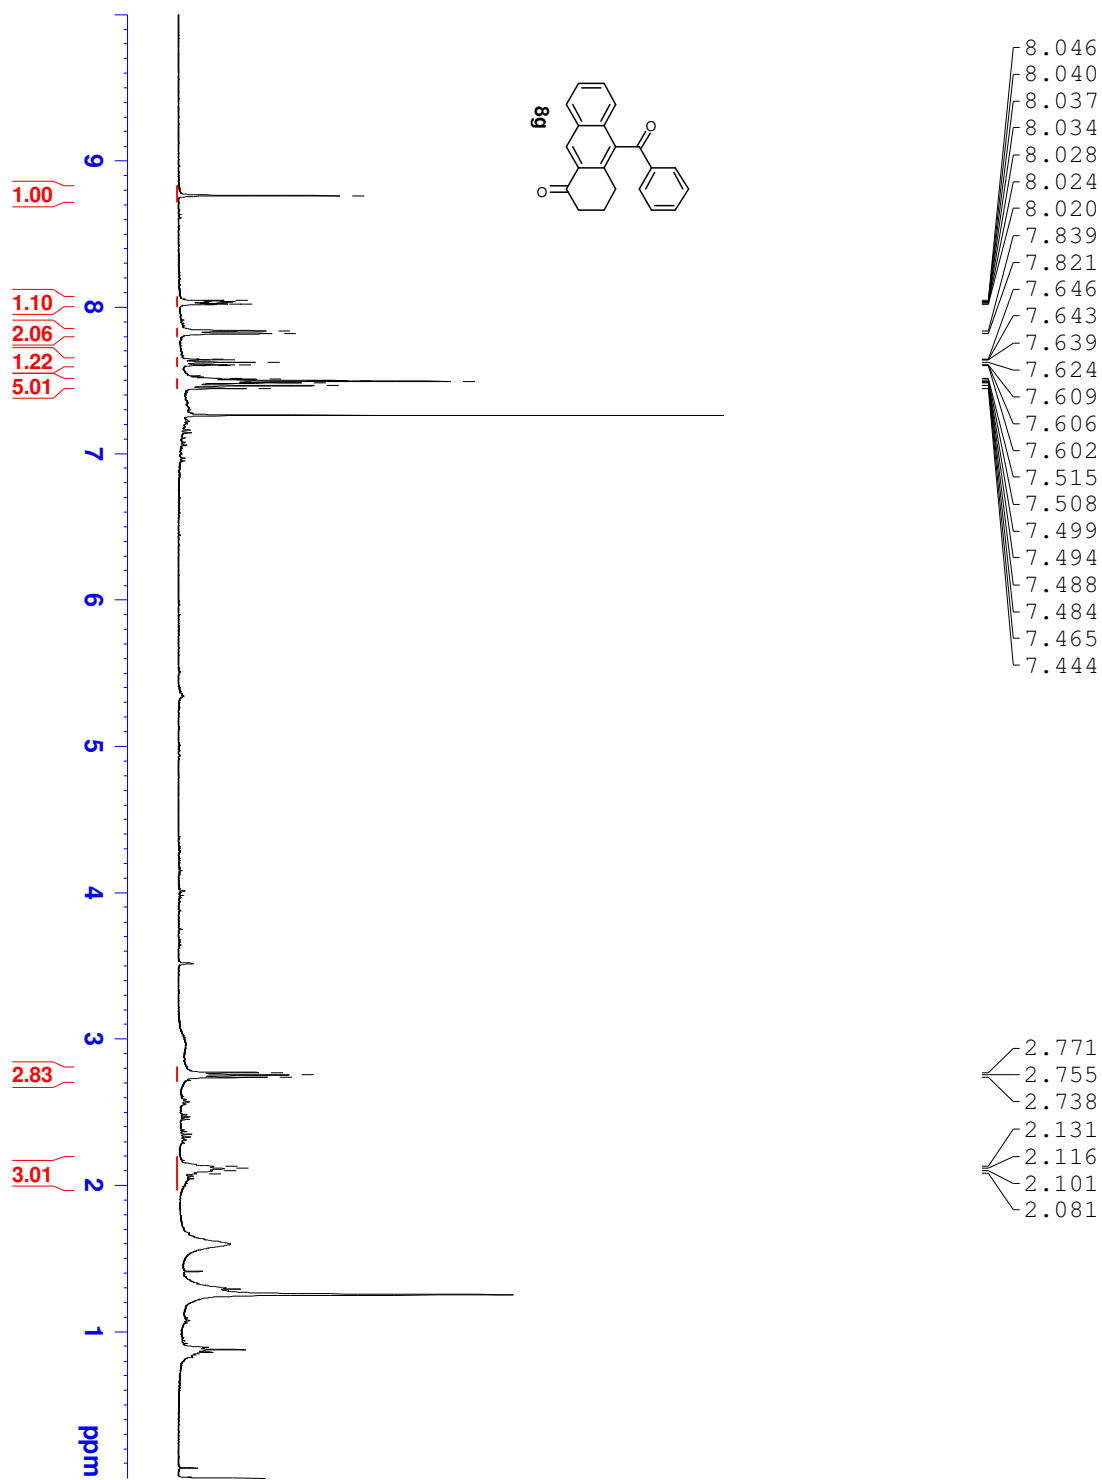

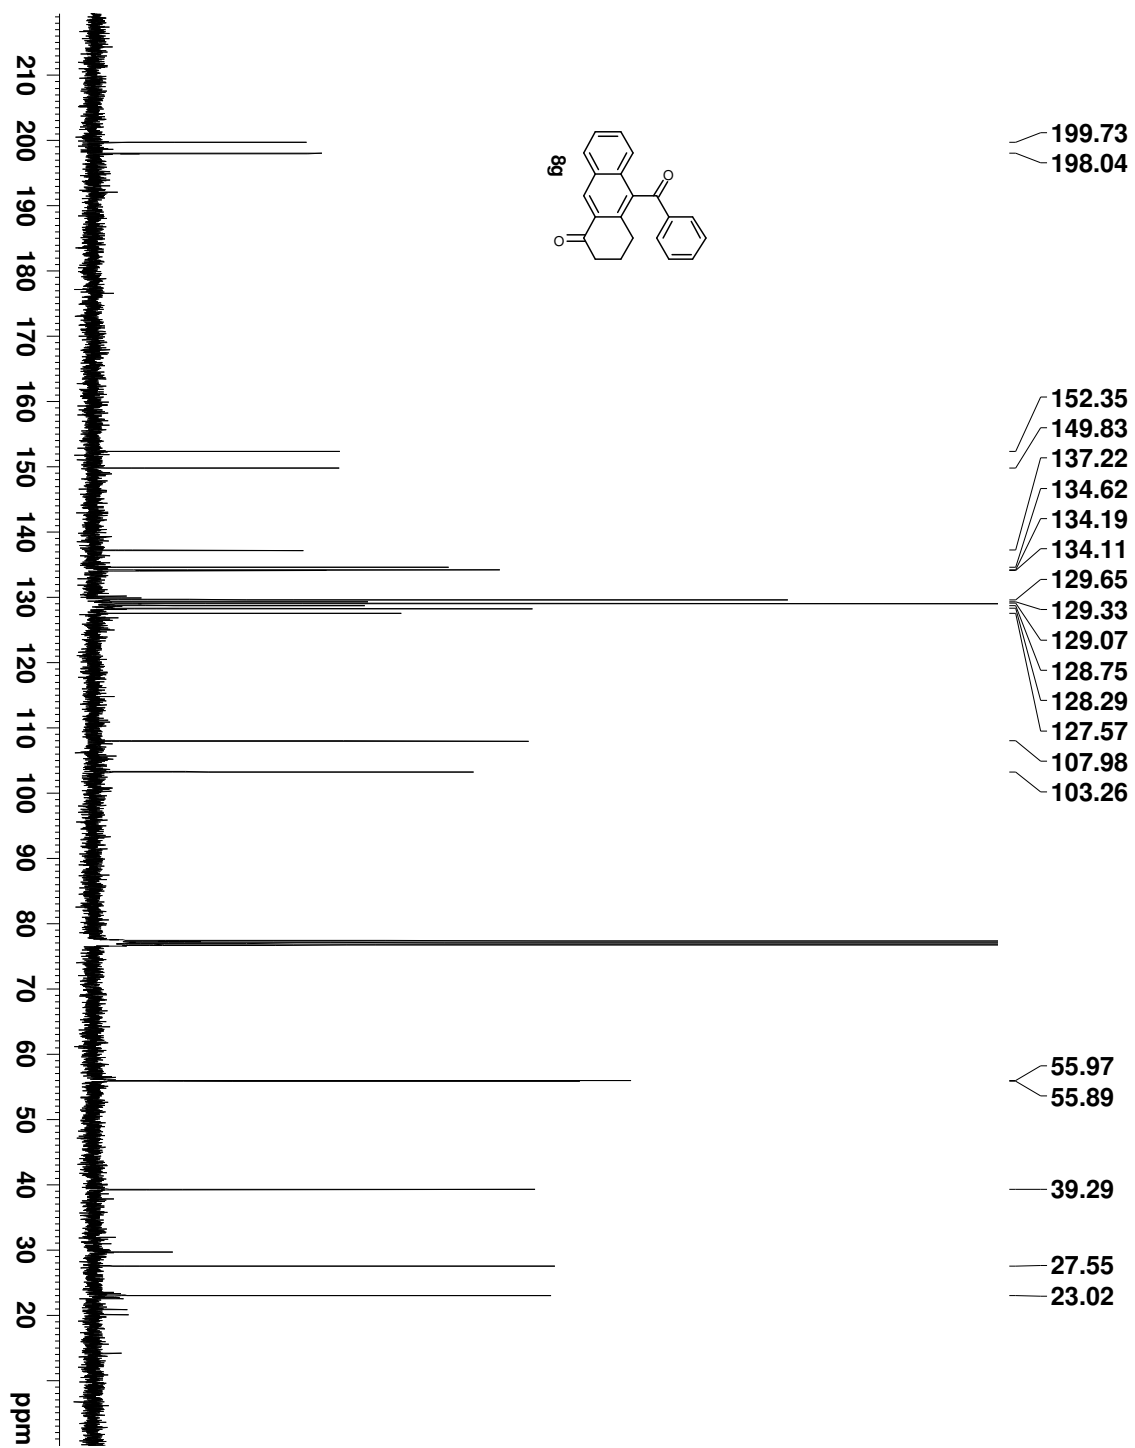

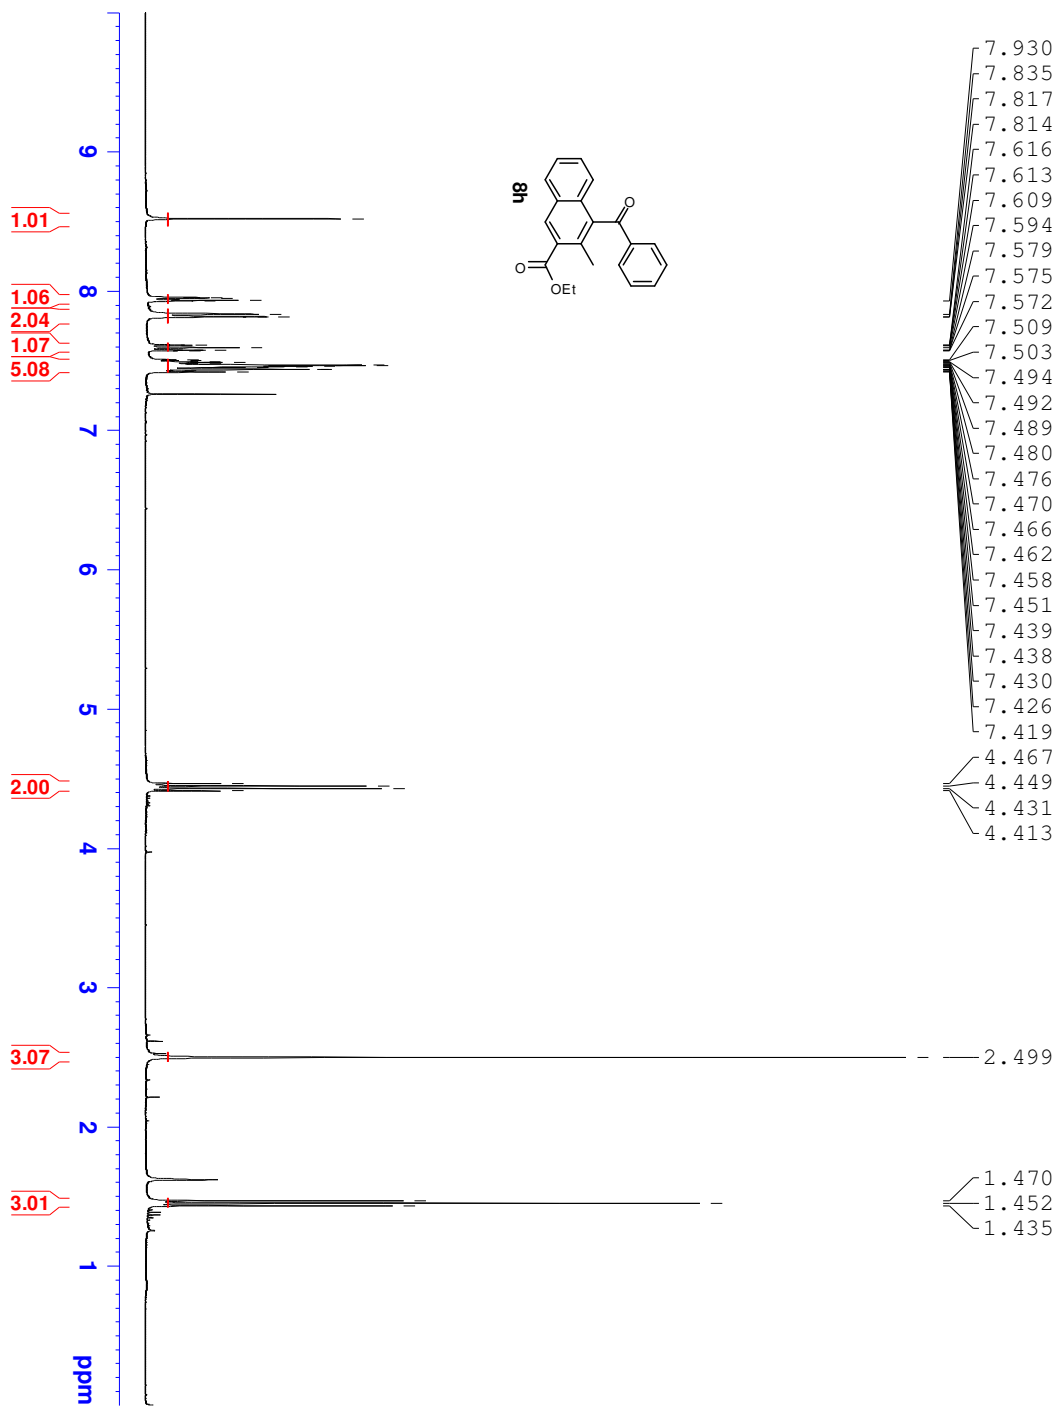



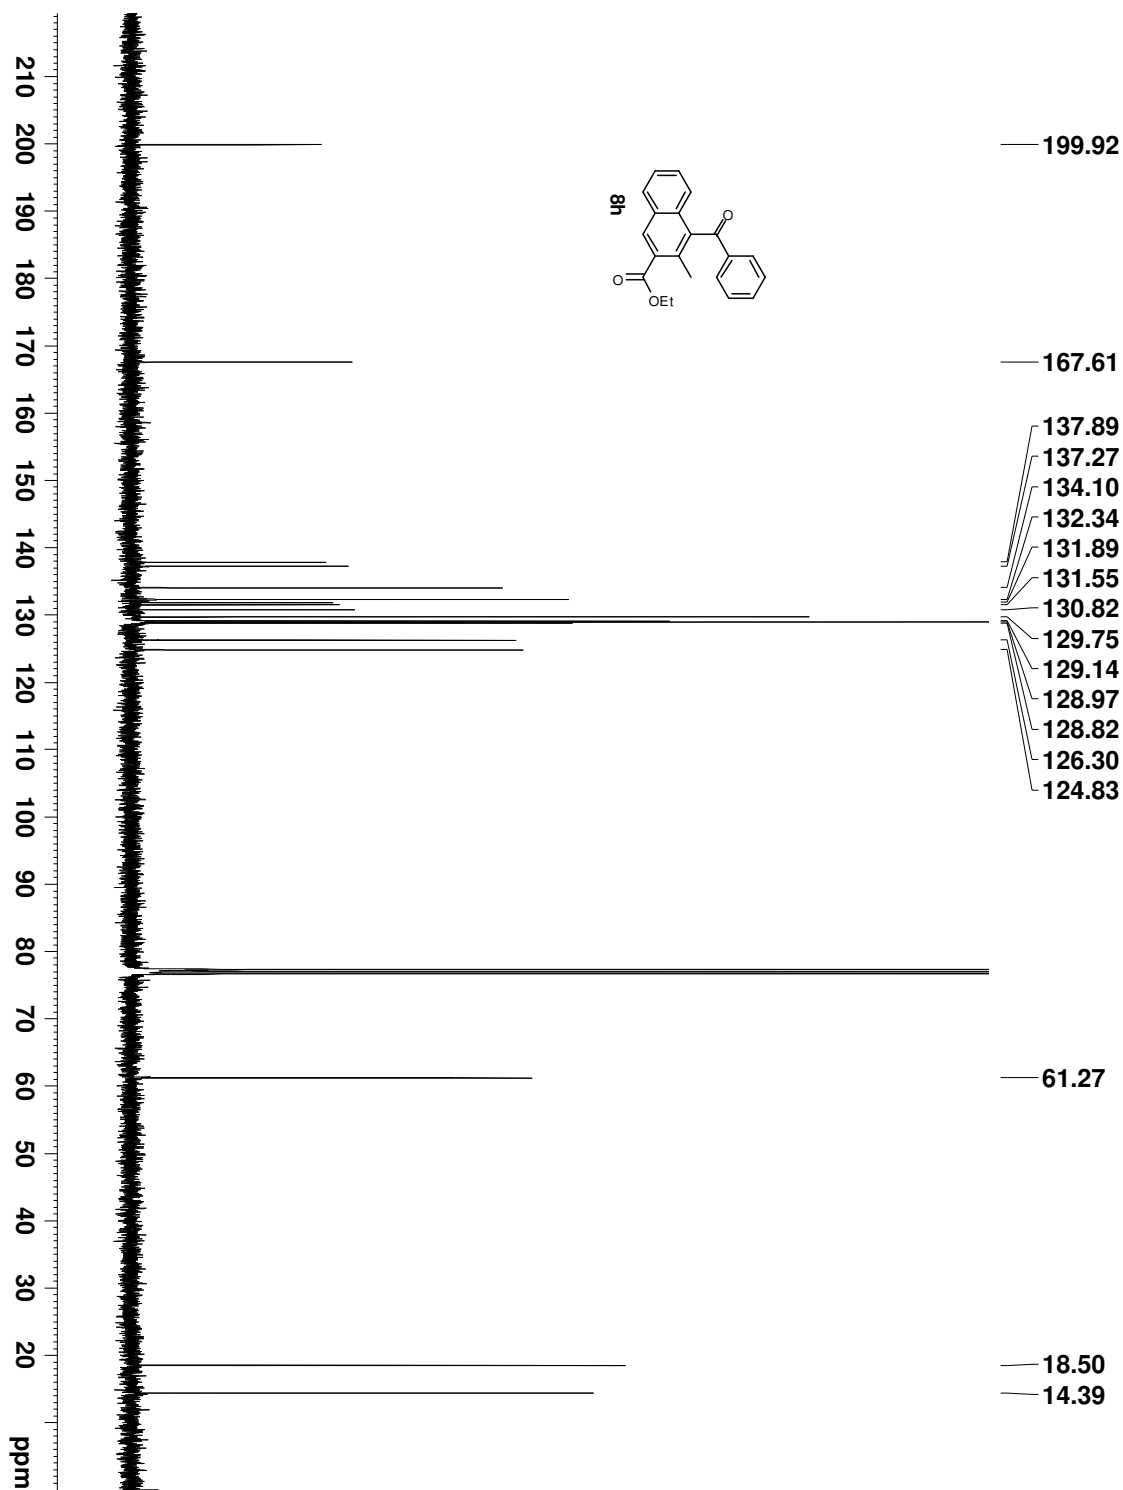

Supplement: c3ob41439f.pdf [file c3ob41439f.pdf]
